# Supplementary material for: Transcriptome and Metabolome Integration Provides New Insights Into the Regulatory Networks of Tibetan Pig Alveolar Type II Epithelial Cells in Response to Hypoxia
Source: Front Genet. 2022 Jan 21;13:812411. doi: 10.3389/fgene.2022.812411 (PMC8814526; doi:10.3389/fgene.2022.812411)
Supplement: Supplementary file 7 [file DataSheet7.xls]

## Sheet: Normoxic  and hypoxi
7.1 Integration analysis of KEGG annotation in DEGs for normoxic (TN and LN) and hypoxic (TL and LL) groups and DAMs.
KEGG_A_class	KEGG_B_class	Pathway	Gene_TN-vs-TL (546)	Gene_All (7351)	Gene_Pvalue	Gene_Qvalue	Metabolites Count (240)	Pathway ID	Genes	K_IDs	Metabolites	C_IDs
Environmental Information Processing	Signal transduction	MAPK signaling pathway	40	288	7.49911e-05	0.0101215	1	ko04010	ncbi_396810(KIT);ncbi_733590(MEF2C);ncbi_100270820(GNG12);ncbi_100513084(CSF1);ncbi_100513811(AKT3);ncbi_396648(HSP70.2);ncbi_396826(FAS);ncbi_397009(ANGPT1);ncbi_397157(VEGFA);ncbi_397377(CACNA2D1);ncbi_397491(IGF1);ncbi_397495(BDNF);ncbi_100154763(TAOK3);ncbi_396610(MAPK8);ncbi_100521141(ARRB1);ncbi_100525120(HGF);ncbi_100520687(PLA2G4A);ncbi_100626141(ELK4);ncbi_100621234(MAP3K2);ncbi_10062217…	K05091+K04454+K04347+K05453+K04456+K03283+K04390+K05465+K05448+K04858+K05459+K04355+K04429+K04440+K04439+K05460+K16342+K04376+K04420+K04429+K04412+K04373+K04425+K04424+K04404+K04358+K04386+K13376+K04870+K08052+K07831+K04462+K04450+K12326+K03099+K04406+K04850+K04856+K03099+K04465	Com_18786_neg	C00575
Organismal Systems	Circulatory system	Vascular smooth muscle contraction	21	116	0.000106122	0.0101215	4	ko04270	ncbi_654405(GNAQ);ncbi_733640(PRKG1);ncbi_733615(ACTA2);ncbi_100157760(MYL9);ncbi_397163(RAMP3);ncbi_397434(KCNMA1);ncbi_100520687(PLA2G4A);ncbi_100524227(CALD1);ncbi_397447(ROCK1);ncbi_100523324(ARHGEF12);ncbi_100516581(PLCB4);ncbi_100524288(MYLK2);ncbi_397445(ROCK2);ncbi_100152679(PLCB1);ncbi_100520667(ACTG2);ncbi_100514402(ADCY3);ncbi_100622999(ADCY8);ncbi_100153508(NPR1);ncbi_397190(PPP1R12A)…	K04634+K07376+K12313+K12755+K08449+K04936+K16342+K12327+K04514+K07532+K05858+K00907+K17388+K05858+K12315+K08043+K08048+K12323+K06270+K04959+K04850	Com_190_pos;Com_13965_pos;Com_18786_neg;Com_5_neg	C00212+C01312+C00575+C00219
Environmental Information Processing	Signal transduction	cGMP - PKG signaling pathway	26	162	0.000137241	0.0101215	4	ko04022	ncbi_606743(ADORA1);ncbi_641353(ADRA2B);ncbi_654405(GNAQ);ncbi_733590(MEF2C);ncbi_733640(PRKG1);ncbi_100157760(MYL9);ncbi_100513811(AKT3);ncbi_397434(KCNMA1);ncbi_397636(ATP2B1);ncbi_397651(VDAC3);ncbi_397447(ROCK1);ncbi_733706(ADRA2C);ncbi_100516581(PLCB4);ncbi_100524288(MYLK2);ncbi_397445(ROCK2);ncbi_100736562(CREB1);ncbi_100513441(ATF2);ncbi_100152679(PLCB1);ncbi_100520061(ATP2B3);ncbi_1005144…	K04265+K04139+K04634+K04454+K07376+K12755+K04456+K04936+K05850+K15041+K04514+K04140+K05858+K00907+K17388+K05870+K04450+K05858+K05850+K08043+K08048+K12323+K06270+K04959+K04850+K13762	Com_27274_pos;Com_190_pos;Com_6944_pos;Com_18786_neg	C00020+C00212+C00144+C00575
Environmental Information Processing	Signal transduction	HIF-1 signaling pathway	18	96	0.000206683	0.0121943	1	ko04066	ncbi_692156(ENO3);ncbi_494561(HK2);ncbi_100286871(PDK1);ncbi_100152344(HK1);ncbi_100513811(AKT3);ncbi_396945(SERPINE1);ncbi_397009(ANGPT1);ncbi_397062(TFRC);ncbi_397157(VEGFA);ncbi_397491(IGF1);ncbi_399522(IL6R);ncbi_100152368(EGLN3);ncbi_100127158(RPS6KB1);ncbi_100157750(ENO2);ncbi_100516289(PFKFB3);ncbi_100511937(LOC100511937);ncbi_100621789(PIK3CA);ncbi_102164419(SLC2A1)	K01689+K00844+K12077+K00844+K04456+K03982+K05465+K06503+K05448+K05459+K05055+K09592+K04688+K01689+K01103+K02649+K00922+K07299	Com_9531_neg	C00072
Organismal Systems	Endocrine system	Aldosterone synthesis and secretion	17	92	0.000369071	0.0165411	8	ko04925	ncbi_654405(GNAQ);ncbi_397636(ATP2B1);ncbi_100523181(PRKD3);ncbi_100516581(PLCB4);ncbi_100736562(CREB1);ncbi_100513441(ATF2);ncbi_100152679(PLCB1);ncbi_100520061(ATP2B3);ncbi_100514402(ADCY3);ncbi_100152456(KCNK9);ncbi_100622999(ADCY8);ncbi_100153508(NPR1);ncbi_100517279(ITPR2);ncbi_100518733(CACNA1C);ncbi_100154640(CACNA1I);ncbi_102165436(PRKD1);MSTRG.18732(NR4A1)	K04634+K05850+K06070+K05858+K05870+K04450+K05858+K05850+K08043+K04919+K08048+K12323+K04959+K04850+K04856+K06070+K04465	Com_27274_pos;Com_40620_pos;Com_24643_pos;Com_36804_pos;Com_18786_neg;Com_7286_neg;Com_4049_neg;Com_5_neg	C00020+C00187+C00003+C01953+C00575+C02140+C00003+C00219
Organismal Systems	Nervous system	Retrograde endocannabinoid signaling	23	145	0.000392501	0.0165411	4	ko04723	ncbi_654405(GNAQ);ncbi_100233193(MGLL);ncbi_100270820(GNG12);ncbi_100156288(NDUFA4L2);ncbi_397590(PTGS2);ncbi_396610(MAPK8);ncbi_100514772(SLC17A7);ncbi_100520312(NDUFA3);ncbi_100622617(GABRA2);ncbi_100516581(PLCB4);ncbi_100524280(GNB4);ncbi_100152679(PLCB1);ncbi_100514402(ADCY3);ncbi_100622999(ADCY8);ncbi_100517279(ITPR2);ncbi_100518733(CACNA1C);ncbi_100516976(GNAO1);ncbi_808501(ND1);ncbi_808502…	K04634+K01054+K04347+K03948+K11987+K04440+K12302+K03947+K05175+K05858+K04538+K05858+K08043+K08048+K04959+K04850+K04534+K03878+K03879+K03880+K03882+K03881+K03883	Com_308_neg;Com_18786_neg;Com_18846_neg;Com_5_neg	C00025+C00575+C00689+C00219
Organismal Systems	Nervous system	Cholinergic synapse	19	112	0.000528518	0.0194891	3	ko04725	ncbi_654405(GNAQ);ncbi_100270820(GNG12);ncbi_100513811(AKT3);ncbi_397293(KCNJ2);ncbi_100151989(CHRNA3);ncbi_100516491(CHRNB2);ncbi_100621099(ACHE);ncbi_100516581(PLCB4);ncbi_100511937(LOC100511937);ncbi_100621789(PIK3CA);ncbi_100524280(GNB4);ncbi_100736562(CREB1);ncbi_100152679(PLCB1);ncbi_110257402(KCNQ2);ncbi_100514402(ADCY3);ncbi_100622999(ADCY8);ncbi_100517279(ITPR2);ncbi_100518733(CACNA1C);n…	K04634+K04347+K04456+K04996+K04805+K04813+K01049+K05858+K02649+K00922+K04538+K05870+K05858+K04927+K08043+K08048+K04959+K04850+K04534	Com_233_pos;Com_6717_pos;Com_18786_neg	C00114+C01996+C00575
Organismal Systems	Endocrine system	Regulation of lipolysis in adipocyte	11	54	0.00174126	0.0395131	6	ko04923	ncbi_606743(ADORA1);ncbi_733640(PRKG1);ncbi_100233193(MGLL);ncbi_100513811(AKT3);ncbi_397590(PTGS2);ncbi_397541(PTGS1);ncbi_100511937(LOC100511937);ncbi_100621789(PIK3CA);ncbi_100514402(ADCY3);ncbi_100622999(ADCY8);ncbi_100153508(NPR1)	K04265+K07376+K01054+K04456+K11987+K00509+K02649+K00922+K08043+K08048+K12323	Com_27274_pos;Com_190_pos;Com_10082_pos;Com_18786_neg;Com_7286_neg;Com_5_neg	C00020+C00212+C00788+C00575+C02140+C00219
Metabolism	Carbohydrate metabolism	Starch and sucrose metabolism	8	33	0.0023171	0.0455697	4	ko00500	ncbi_494561(HK2);ncbi_574064(GYS1);ncbi_100152344(HK1);ncbi_397566(PGM1);ncbi_100522261(PGM2);ncbi_100156209(GBE1);ncbi_100623494(MGAM2);MSTRG.17599(AGL)	K00844+K00693+K00844+K01835+K15779+K00700+K12047+K01196	Com_1543_pos;Com_140_pos;Com_18846_neg;Com_62_neg	C00208+C00208+C00689+C00252
Organismal Systems	Endocrine system	Renin secretion	12	65	0.00264472	0.0474978	4	ko04924	ncbi_606743(ADORA1);ncbi_654405(GNAQ);ncbi_397293(KCNJ2);ncbi_397434(KCNMA1);ncbi_100516581(PLCB4);ncbi_100157073(AGT);ncbi_100736562(CREB1);ncbi_100152819(PDE1A);ncbi_100152679(PLCB1);ncbi_100153508(NPR1);ncbi_100517279(ITPR2);ncbi_100518733(CACNA1C)	K04265+K04634+K04996+K04936+K05858+K09821+K05870+K13755+K05858+K12323+K04959+K04850	Com_27274_pos;Com_190_pos;Com_10082_pos;Com_18786_neg	C00020+C00212+C00788+C00575
Organismal Systems	Endocrine system	Oxytocin signaling pathway	21	148	0.00291629	0.0477948	3	ko04921	ncbi_654405(GNAQ);ncbi_733590(MEF2C);ncbi_100145903(PRKAA1);ncbi_100157760(MYL9);ncbi_397293(KCNJ2);ncbi_397377(CACNA2D1);ncbi_397590(PTGS2);ncbi_100520687(PLA2G4A);ncbi_397447(ROCK1);ncbi_100516581(PLCB4);ncbi_100524288(MYLK2);ncbi_397445(ROCK2);ncbi_100525250(CACNG5);ncbi_100152679(PLCB1);ncbi_100514402(ADCY3);ncbi_100622999(ADCY8);ncbi_100153508(NPR1);ncbi_397190(PPP1R12A);ncbi_100517279(ITPR2…	K04634+K04454+K07198+K12755+K04996+K04858+K11987+K16342+K04514+K05858+K00907+K17388+K04870+K05858+K08043+K08048+K12323+K06270+K04959+K04850+K04534	Com_5511_neg;Com_18786_neg;Com_5_neg	C13050+C00575+C00219
Organismal Systems	Immune system	Platelet activation	18	120	0.00309092	0.0478137	3	ko04611	ncbi_654405(GNAQ);ncbi_733640(PRKG1);ncbi_100513811(AKT3);ncbi_397063(ITGB3);ncbi_397541(PTGS1);ncbi_100520687(PLA2G4A);ncbi_397447(ROCK1);ncbi_100523324(ARHGEF12);ncbi_100516581(PLCB4);ncbi_100524288(MYLK2);ncbi_397445(ROCK2);ncbi_100511937(LOC100511937);ncbi_100621789(PIK3CA);ncbi_100152679(PLCB1);ncbi_100514402(ADCY3);ncbi_100622999(ADCY8);ncbi_397190(PPP1R12A);ncbi_100517279(ITPR2)	K04634+K07376+K04456+K06493+K00509+K16342+K04514+K07532+K05858+K00907+K17388+K02649+K00922+K05858+K08043+K08048+K06270+K04959	Com_13965_pos;Com_18786_neg;Com_5_neg	C01312+C00575+C00219
Organismal Systems	Endocrine system	Estrogen signaling pathway	19	130	0.0032416	0.0478137	2	ko04915	ncbi_574068(NCOA1);ncbi_654405(GNAQ);ncbi_100135658(NCOA2);ncbi_100513811(AKT3);ncbi_396648(HSP70.2);ncbi_397191(HSP90B1);ncbi_100516581(PLCB4);ncbi_100511937(LOC100511937);ncbi_100511175(GABBR2);ncbi_100621789(PIK3CA);ncbi_100736562(CREB1);ncbi_100513441(ATF2);ncbi_100152679(PLCB1);ncbi_100520187(SOS1);ncbi_100514402(ADCY3);ncbi_100622999(ADCY8);ncbi_100517279(ITPR2);ncbi_100516976(GNAO1);ncbi_1…	K09101+K04634+K11255+K04456+K03283+K09487+K05858+K02649+K04615+K00922+K05870+K04450+K05858+K03099+K08043+K08048+K04959+K04534+K03099	Com_5124_pos;Com_18786_neg	C00951+C00575
Human Diseases	Cancers	Renal cell carcinoma	12	68	0.00390099	0.0500694	2	ko05211	ncbi_100037272(EPAS1);ncbi_100513811(AKT3);ncbi_397157(VEGFA);ncbi_100152368(EGLN3);ncbi_100525120(HGF);ncbi_100170851(PTPN11);ncbi_100511937(LOC100511937);ncbi_397084(TGFB2);ncbi_100621789(PIK3CA);ncbi_100520187(SOS1);ncbi_102164419(SLC2A1);ncbi_100156602(SOS2)	K09095+K04456+K05448+K09592+K05460+K07293+K02649+K13376+K00922+K03099+K07299+K03099	Com_1305_neg;Com_5238_neg	C00149+C00122
Cellular Processes	Cellular community - eukaryotes	Gap junction	14	86	0.00409413	0.0500694	3	ko04540	ncbi_654405(GNAQ);ncbi_733640(PRKG1);ncbi_100153507(TUBB2B);ncbi_397432(HTR2A);ncbi_100510930(LOC100510930);ncbi_100621234(MAP3K2);ncbi_100736584(TUBB4A);ncbi_100516581(PLCB4);ncbi_100152679(PLCB1);ncbi_100520187(SOS1);ncbi_100514402(ADCY3);ncbi_100622999(ADCY8);ncbi_100517279(ITPR2);ncbi_100156602(SOS2)	K04634+K07376+K07375+K04157+K07374+K04420+K07375+K05858+K05858+K03099+K08043+K08048+K04959+K03099	Com_22_pos;Com_308_neg;Com_18786_neg	C03758+C00025+C00575
Organismal Systems	Endocrine system	Thyroid hormone synthesis	12	71	0.00559769	0.0589756	2	ko04918	ncbi_654405(GNAQ);ncbi_397191(HSP90B1);ncbi_100519691(GPX8);ncbi_396625(GSR);ncbi_100516581(PLCB4);ncbi_100736562(CREB1);ncbi_100513441(ATF2);ncbi_100519689(LRP2);ncbi_100152679(PLCB1);ncbi_100514402(ADCY3);ncbi_100622999(ADCY8);ncbi_100517279(ITPR2)	K04634+K09487+K00432+K00383+K05858+K05870+K04450+K06233+K05858+K08043+K08048+K04959	Com_28093_pos;Com_18786_neg	C00051+C00575
Human Diseases	Cancers	Pathways in cancer	52	503	0.00829961	0.0736739	10	ko05200	ncbi_574068(NCOA1);ncbi_654405(GNAQ);ncbi_396810(KIT);ncbi_100037272(EPAS1);ncbi_100037294(IL6ST);ncbi_100270820(GNG12);ncbi_100286873(NQO1);ncbi_100517932(APC);ncbi_100513811(AKT3);ncbi_100153094(LOC100153094);ncbi_396826(FAS);ncbi_397157(VEGFA);ncbi_397191(HSP90B1);ncbi_396681(TXNRD1);ncbi_397491(IGF1);ncbi_397536(BCL2L1);ncbi_397590(PTGS2);ncbi_397614(IL4R);ncbi_397615(IL13RA1);ncbi_399522(IL6…	K09101+K04634+K05091+K09095+K05060+K04347+K00355+K02085+K04456+K00799+K04390+K05448+K09487+K22182+K05459+K04570+K11987+K05071+K05076+K05055+K09592+K04440+K11218+K15420+K05460+K04688+K05638+K06240+K04514+K01384+K00444+K09291+K16060+K07532+K05858+K17388+K04358+K02649+K13376+K00922+K04538+K04462+K05858+K21635+K08736+K03099+K08043+K08048+K00572+K03068+K07299+K03099	Com_33974_pos;Com_25418_pos;Com_40620_pos;Com_5124_pos;Com_8549_pos;Com_20746_pos;Com_1105_pos;Com_18786_neg;Com_1305_neg;Com_5238_neg	C00280+C00535+C00187+C00951+C00735+C00735+C00762+C00575+C00149+C00122
Organismal Systems	Sensory system	Inflammatory mediator regulation of TRP channels	14	97	0.0119161	0.092426	4	ko04750	ncbi_654405(GNAQ);ncbi_397432(HTR2A);ncbi_397491(IGF1);ncbi_100152934(TRPA1);ncbi_396610(MAPK8);ncbi_100520687(PLA2G4A);ncbi_100516581(PLCB4);ncbi_100626904(IL1R1);ncbi_100511937(LOC100511937);ncbi_100621789(PIK3CA);ncbi_100152679(PLCB1);ncbi_100514402(ADCY3);ncbi_100622999(ADCY8);ncbi_100517279(ITPR2)	K04634+K04157+K05459+K04984+K04440+K16342+K05858+K04386+K02649+K00922+K05858+K08043+K08048+K04959	Com_18786_neg;Com_2275_neg;Com_2258_neg;Com_5_neg	C00575+C05965+C02165+C00219
Organismal Systems	Aging	Longevity regulating pathway - multiple species	10	61	0.0135521	0.0963325	1	ko04213	ncbi_751859(SIRT1);ncbi_100145903(PRKAA1);ncbi_100513811(AKT3);ncbi_396648(HSP70.2);ncbi_397491(IGF1);ncbi_100127158(RPS6KB1);ncbi_100511937(LOC100511937);ncbi_100621789(PIK3CA);ncbi_100514402(ADCY3);ncbi_100622999(ADCY8)	K11411+K07198+K04456+K03283+K05459+K04688+K02649+K00922+K08043+K08048	Com_18786_neg	C00575
Organismal Systems	Endocrine system	GnRH signaling pathway	13	89	0.0137151	0.0963325	2	ko04912	ncbi_654405(GNAQ);ncbi_396610(MAPK8);ncbi_100520726(EGR1);ncbi_100520687(PLA2G4A);ncbi_100621234(MAP3K2);ncbi_100516581(PLCB4);ncbi_100152679(PLCB1);ncbi_100520187(SOS1);ncbi_100514402(ADCY3);ncbi_100622999(ADCY8);ncbi_100517279(ITPR2);ncbi_100518733(CACNA1C);ncbi_100156602(SOS2)	K04634+K04440+K09203+K16342+K04420+K05858+K05858+K03099+K08043+K08048+K04959+K04850+K03099	Com_18786_neg;Com_5_neg	C00575+C00219
Organismal Systems	Nervous system	Glutamatergic synapse	15	110	0.0155296	0.10654	2	ko04724	ncbi_654405(GNAQ);ncbi_100270820(GNG12);ncbi_100516047(SLC1A3);ncbi_100514772(SLC17A7);ncbi_100520687(PLA2G4A);ncbi_100627068(SLC1A2);ncbi_100516581(PLCB4);ncbi_100524280(GNB4);ncbi_100152679(PLCB1);ncbi_100514402(ADCY3);ncbi_100622999(ADCY8);ncbi_100622375(SHANK3);ncbi_100517279(ITPR2);ncbi_100518733(CACNA1C);ncbi_100516976(GNAO1)	K04634+K04347+K05614+K12302+K16342+K05613+K05858+K04538+K05858+K08043+K08048+K15009+K04959+K04850+K04534	Com_308_neg;Com_18786_neg	C00025+C00575
Human Diseases	Infectious diseases	Chagas disease (American trypanosomiasis)	14	103	0.0195146	0.122485	2	ko05142	ncbi_654405(GNAQ);ncbi_100048958(GNA14);ncbi_100513811(AKT3);ncbi_396826(FAS);ncbi_396945(SERPINE1);ncbi_397422(CCL2);ncbi_396610(MAPK8);ncbi_100516581(PLCB4);ncbi_100511937(LOC100511937);ncbi_397084(TGFB2);ncbi_100621789(PIK3CA);ncbi_100152679(PLCB1);ncbi_100516976(GNAO1);ncbi_100737053(PPP2R2C)	K04634+K04636+K04456+K04390+K03982+K14624+K04440+K05858+K02649+K13376+K00922+K05858+K04534+K04354	Com_18786_neg;Com_3253_neg	C00575+C00062
Human Diseases	Infectious diseases	HTLV-I infection	28	252	0.0200925	0.123485	1	ko05166	ncbi_100101922(ATM);ncbi_100302364(MSX1);ncbi_100153932(FDPS);ncbi_100517932(APC);ncbi_100513811(AKT3);ncbi_397536(BCL2L1);ncbi_397651(VDAC3);ncbi_100518649(JAK3);ncbi_100520726(EGR1);ncbi_100517185(CDC27);ncbi_100626141(ELK4);ncbi_100738612(ATF3);ncbi_100521912(WNT11);ncbi_100627056(WNT5A);ncbi_100037293(SLA-1);ncbi_100626904(IL1R1);ncbi_100511937(LOC100511937);ncbi_397084(TGFB2);ncbi_100621398(…	K04728+K09341+K00787+K02085+K04456+K04570+K15041+K11218+K09203+K03350+K04376+K09032+K01384+K00444+K06751+K04386+K02649+K13376+K07831+K06640+K00922+K06062+K05870+K04450+K08043+K08048+K00572+K07299	Com_18786_neg	C00575
Organismal Systems	Endocrine system	Glucagon signaling pathway	13	95	0.0227106	0.136727	5	ko04922	ncbi_654405(GNAQ);ncbi_100233197(PFKFB1);ncbi_751859(SIRT1);ncbi_100145903(PRKAA1);ncbi_574064(GYS1);ncbi_100512224(PPP4R3B);ncbi_100513811(AKT3);ncbi_100516581(PLCB4);ncbi_100736562(CREB1);ncbi_100513441(ATF2);ncbi_100152679(PLCB1);ncbi_100517279(ITPR2);ncbi_102164419(SLC2A1)	K04634+K19028+K11411+K07198+K00693+K17491+K04456+K05858+K05870+K04450+K05858+K04959+K07299	Com_489_neg;Com_18786_neg;Com_2068_neg;Com_1305_neg;Com_5238_neg	C00158+C00575+C00074+C00149+C00122
Organismal Systems	Nervous system	Dopaminergic synapse	16	126	0.023727	0.139989	5	ko04728	ncbi_654405(GNAQ);ncbi_100270820(GNG12);ncbi_100513811(AKT3);ncbi_396610(MAPK8);ncbi_100516581(PLCB4);ncbi_595132(KIF5B);ncbi_100524280(GNB4);ncbi_100158118(CALY);ncbi_100736562(CREB1);ncbi_100513441(ATF2);ncbi_100152679(PLCB1);ncbi_100517279(ITPR2);ncbi_100518733(CACNA1C);ncbi_100516976(GNAO1);ncbi_100737053(PPP2R2C);ncbi_100628097(CLOCK)	K04634+K04347+K04456+K04440+K05858+K10396+K04538+K15493+K05870+K04450+K05858+K04959+K04850+K04534+K04354+K02223	Com_22_pos;Com_2319_pos;Com_71_neg;Com_18786_neg;Com_9194_neg	C03758+C00355+C00082+C00575+C05582
Environmental Information Processing	Signal transduction	Rap1 signaling pathway	23	203	0.0271084	0.151185	1	ko04015	ncbi_654405(GNAQ);ncbi_396810(KIT);ncbi_100513084(CSF1);ncbi_100513811(AKT3);ncbi_397009(ANGPT1);ncbi_397063(ITGB3);ncbi_397157(VEGFA);ncbi_397491(IGF1);ncbi_100523181(PRKD3);ncbi_100525120(HGF);ncbi_100521255(RAPGEF6);ncbi_100516581(PLCB4);ncbi_397281(FGF7);ncbi_100511937(LOC100511937);ncbi_100621398(MRAS);ncbi_100621789(PIK3CA);ncbi_100152679(PLCB1);ncbi_100520706(DOCK4);ncbi_100514402(ADCY3);n…	K04634+K05091+K05453+K04456+K05465+K06493+K05448+K05459+K06070+K05460+K08020+K05858+K04358+K02649+K07831+K00922+K05858+K17697+K08043+K08048+K04534+K06070+K17705	Com_18786_neg	C00575
Human Diseases	Endocrine and metabolic diseases	Insulin resistance	14	108	0.0282611	0.151185	2	ko04931	ncbi_100145903(PRKAA1);ncbi_574064(GYS1);ncbi_100513811(AKT3);ncbi_396610(MAPK8);ncbi_100518539(GFPT2);ncbi_100127158(RPS6KB1);ncbi_641349(PPP1R3C);ncbi_100515931(PPP1R3B);ncbi_100522174(RPS6KA3);ncbi_100170851(PTPN11);ncbi_100511937(LOC100511937);ncbi_100621789(PIK3CA);ncbi_100736562(CREB1);ncbi_102164419(SLC2A1)	K07198+K00693+K04456+K04440+K00820+K04688+K07189+K07189+K04373+K07293+K02649+K00922+K05870+K07299	Com_1010_pos;Com_11499_neg	C02571+C02571
Organismal Systems	Endocrine system	Progesterone-mediated oocyte maturation	12	88	0.028635	0.151185	1	ko04914	ncbi_100415776(ANAPC13);ncbi_100513811(AKT3);ncbi_397491(IGF1);ncbi_396610(MAPK8);ncbi_100517185(CDC27);ncbi_100521758(CPEB4);ncbi_100152117(CPEB3);ncbi_100522174(RPS6KA3);ncbi_100511937(LOC100511937);ncbi_100621789(PIK3CA);ncbi_100514402(ADCY3);ncbi_100622999(ADCY8)	K12456+K04456+K05459+K04440+K03350+K02602+K02602+K04373+K02649+K00922+K08043+K08048	Com_18786_neg	C00575
Cellular Processes	Cell motility	Regulation of actin cytoskeleton	23	205	0.0299614	0.155063	1	ko04810	ncbi_494457(RDX);ncbi_497233(CFL2);ncbi_100037284(ITGB8);ncbi_100270820(GNG12);ncbi_100517932(APC);ncbi_100157760(MYL9);ncbi_397063(ITGB3);ncbi_100158033(NCKAP1);ncbi_397447(ROCK1);ncbi_100523324(ARHGEF12);ncbi_100521692(PIKFYVE);ncbi_100524288(MYLK2);ncbi_397445(ROCK2);ncbi_397281(FGF7);ncbi_100511937(LOC100511937);ncbi_100521988(ITGB4);ncbi_100621398(MRAS);ncbi_100621789(PIK3CA);ncbi_100155257(…	K05762+K05765+K06591+K04347+K02085+K12755+K06493+K05750+K04514+K07532+K00921+K00907+K17388+K04358+K02649+K06525+K07831+K00922+K05741+K03099+K06270+K16848+K03099	Com_6717_pos	C01996
Organismal Systems	Aging	Longevity regulating pathway - mammal	12	89	0.0309602	0.15747	5	ko04211	ncbi_751859(SIRT1);ncbi_100145903(PRKAA1);ncbi_100513811(AKT3);ncbi_397491(IGF1);ncbi_100526065(SESN3);ncbi_100127158(RPS6KB1);ncbi_100511937(LOC100511937);ncbi_100621789(PIK3CA);ncbi_100736562(CREB1);ncbi_100513441(ATF2);ncbi_100514402(ADCY3);ncbi_100622999(ADCY8)	K11411+K07198+K04456+K05459+K10141+K04688+K02649+K00922+K05870+K04450+K08043+K08048	Com_27274_pos;Com_24643_pos;Com_18786_neg;Com_4049_neg;Com_1844_neg	C00020+C00003+C00575+C00003+C07909
Metabolism	Carbohydrate metabolism	Glycolysis / Gluconeogenesis	9	62	0.0382122	0.191061	2	ko00010	ncbi_692156(ENO3);ncbi_494561(HK2);ncbi_100152344(HK1);ncbi_397566(PGM1);ncbi_397129(DLD);ncbi_100152243(MINPP1);ncbi_100522261(PGM2);ncbi_100157750(ENO2);ncbi_100512795(LOC100512795)	K01689+K00844+K00844+K01835+K00382+K03103+K15779+K01689+K13951	Com_5747_neg;Com_2068_neg	C00111+C00074
Organismal Systems	Endocrine system	Insulin signaling pathway	16	135	0.0415841	0.204112	1	ko04910	ncbi_100037966(SOCS2);ncbi_494561(HK2);ncbi_100302366(SOCS4);ncbi_100145903(PRKAA1);ncbi_574064(GYS1);ncbi_100152344(HK1);ncbi_100513811(AKT3);ncbi_396610(MAPK8);ncbi_100127158(RPS6KB1);ncbi_100519708(SH2B2);ncbi_641349(PPP1R3C);ncbi_100515931(PPP1R3B);ncbi_100511937(LOC100511937);ncbi_100621789(PIK3CA);ncbi_100520187(SOS1);ncbi_100156602(SOS2)	K04695+K00844+K04697+K07198+K00693+K00844+K04456+K04440+K04688+K07193+K07189+K07189+K02649+K00922+K03099+K03099	Com_18786_neg	C00575
Organismal Systems	Endocrine system	Insulin secretion	11	83	0.0422061	0.204112	2	ko04911	ncbi_654405(GNAQ);ncbi_397434(KCNMA1);ncbi_100158240(KCNJ11);ncbi_100516581(PLCB4);ncbi_100736562(CREB1);ncbi_100513441(ATF2);ncbi_100152679(PLCB1);ncbi_100514402(ADCY3);ncbi_100622999(ADCY8);ncbi_100518733(CACNA1C);ncbi_102164419(SLC2A1)	K04634+K04936+K05004+K05858+K05870+K04450+K05858+K08043+K08048+K04850+K07299	Com_6717_pos;Com_18786_neg	C01996+C00575
Organismal Systems	Environmental adaptation	Circadian entrainment	12	94	0.044646	0.212429	3	ko04713	ncbi_654405(GNAQ);ncbi_733640(PRKG1);ncbi_100270820(GNG12);ncbi_100516581(PLCB4);ncbi_100524280(GNB4);ncbi_100736562(CREB1);ncbi_100152679(PLCB1);ncbi_100514402(ADCY3);ncbi_100622999(ADCY8);ncbi_100518733(CACNA1C);ncbi_100154640(CACNA1I);ncbi_100516976(GNAO1)	K04634+K07376+K04347+K05858+K04538+K05870+K05858+K08043+K08048+K04850+K04856+K04534	Com_12527_pos;Com_308_neg;Com_18786_neg	C01598+C00025+C00575
Environmental Information Processing	Signal transduction	Ras signaling pathway	24	226	0.0470876	0.21686	1	ko04014	ncbi_396810(KIT);ncbi_100270820(GNG12);ncbi_100513084(CSF1);ncbi_100513811(AKT3);ncbi_397009(ANGPT1);ncbi_397157(VEGFA);ncbi_397491(IGF1);ncbi_397495(BDNF);ncbi_397536(BCL2L1);ncbi_396610(MAPK8);ncbi_100525120(HGF);ncbi_100520687(PLA2G4A);ncbi_100511282(KSR1);ncbi_100170851(PTPN11);ncbi_397281(FGF7);ncbi_100511937(LOC100511937);ncbi_100526136(NF1);ncbi_100621398(MRAS);ncbi_100621789(PIK3CA);ncbi_…	K05091+K04347+K05453+K04456+K05465+K05448+K05459+K04355+K04570+K04440+K05460+K16342+K14958+K07293+K04358+K02649+K08052+K07831+K00922+K04538+K12326+K07360+K03099+K03099	Com_18786_neg	C00575
Metabolism	Biosynthesis of other secondary metabolites	Neomycin, kanamycin and gentamicin biosynthesis	2	5	0.0473644	0.21686	1	ko00524	ncbi_494561(HK2);ncbi_100152344(HK1)	K00844+K00844	Com_308_neg	C00025
Environmental Information Processing	Signal transduction	Sphingolipid signaling pathway	14	116	0.0477827	0.21686	1	ko04071	ncbi_606743(ADORA1);ncbi_654405(GNAQ);ncbi_100513811(AKT3);ncbi_396610(MAPK8);ncbi_397447(ROCK1);ncbi_100519210(SPHK1);ncbi_100516581(PLCB4);ncbi_397445(ROCK2);ncbi_100511937(LOC100511937);ncbi_100621789(PIK3CA);ncbi_100524832(SGPP2);ncbi_100126279(CERS6);ncbi_100152679(PLCB1);ncbi_100737053(PPP2R2C)	K04265+K04634+K04456+K04440+K04514+K04718+K05858+K17388+K02649+K00922+K04717+K04710+K05858+K04354	Com_190_pos	C00212
Organismal Systems	Digestive system	Salivary secretion	10	75	0.04954	0.221429	3	ko04970	ncbi_654405(GNAQ);ncbi_733640(PRKG1);ncbi_397434(KCNMA1);ncbi_397636(ATP2B1);ncbi_100516581(PLCB4);ncbi_100152679(PLCB1);ncbi_100520061(ATP2B3);ncbi_100514402(ADCY3);ncbi_100622999(ADCY8);ncbi_100517279(ITPR2)	K04634+K07376+K04936+K05850+K05858+K05858+K05850+K08043+K08048+K04959	Com_6717_pos;Com_5511_neg;Com_18786_neg	C01996+C13050+C00575
Organismal Systems	Immune system	Chemokine signaling pathway	19	172	0.0519795	0.228865	1	ko04062	ncbi_100134857(NCF1);ncbi_100270820(GNG12);ncbi_100513811(AKT3);ncbi_396735(CXCL16);ncbi_396900(AMCF-II);ncbi_397422(CCL2);ncbi_100518649(JAK3);ncbi_100521141(ARRB1);ncbi_397447(ROCK1);ncbi_100516581(PLCB4);ncbi_397445(ROCK2);ncbi_100511937(LOC100511937);ncbi_100621789(PIK3CA);ncbi_100524280(GNB4);ncbi_100152679(PLCB1);ncbi_100520187(SOS1);ncbi_100514402(ADCY3);ncbi_100622999(ADCY8);ncbi_10015660…	K08011+K04347+K04456+K10035+K05506+K14624+K11218+K04439+K04514+K05858+K17388+K02649+K00922+K04538+K05858+K03099+K08043+K08048+K03099	Com_18786_neg	C00575
Environmental Information Processing	Signal transduction	cAMP signaling pathway	21	195	0.0535002	0.232096	7	ko04024	ncbi_606743(ADORA1);ncbi_397004(SSTR1);ncbi_100157760(MYL9);ncbi_100513811(AKT3);ncbi_397495(BDNF);ncbi_397636(ATP2B1);ncbi_396610(MAPK8);ncbi_100623476(HTR6);ncbi_397447(ROCK1);ncbi_397445(ROCK2);ncbi_100511937(LOC100511937);ncbi_100511175(GABBR2);ncbi_100621789(PIK3CA);ncbi_100736562(CREB1);ncbi_100520061(ATP2B3);ncbi_100037970(PDE4C);ncbi_100514402(ADCY3);ncbi_100622999(ADCY8);ncbi_100153508(N…	K04265+K04217+K12755+K04456+K04355+K05850+K04440+K04162+K04514+K17388+K02649+K04615+K00922+K05870+K05850+K13293+K08043+K08048+K12323+K06270+K04850	Com_6717_pos;Com_27274_pos;Com_190_pos;Com_22_pos;Com_10082_pos;Com_13965_pos;Com_18786_neg	C01996+C00020+C00212+C03758+C00788+C01312+C00575
Environmental Information Processing	Signal transduction	Phosphatidylinositol signaling system	12	97	0.0546166	0.233506	3	ko04070	ncbi_503700(PIK3C3);ncbi_100512551(PIK3C2B);ncbi_100144587(INPP5F);ncbi_100521692(PIKFYVE);ncbi_100516581(PLCB4);ncbi_100625306(PPIP5K2);ncbi_100511937(LOC100511937);ncbi_100157742(DGKH);ncbi_100621789(PIK3CA);ncbi_100623323(IPMK);ncbi_100152679(PLCB1);ncbi_100517279(ITPR2)	K00914+K00923+K21798+K00921+K05858+K13024+K02649+K00901+K00922+K00915+K05858+K04959	Com_21121_pos;Com_15334_neg;Com_992_neg	C01204+C01220+C00137
Environmental Information Processing	Signal transduction	PI3K-Akt signaling pathway	33	337	0.0602194	0.253782	1	ko04151	ncbi_396810(KIT);ncbi_100037284(ITGB8);ncbi_100270820(GNG12);ncbi_100145903(PRKAA1);ncbi_574064(GYS1);ncbi_100513084(CSF1);ncbi_100513811(AKT3);ncbi_397009(ANGPT1);ncbi_397063(ITGB3);ncbi_397157(VEGFA);ncbi_397191(HSP90B1);ncbi_397491(IGF1);ncbi_397495(BDNF);ncbi_397536(BCL2L1);ncbi_397614(IL4R);ncbi_399522(IL6R);ncbi_100518649(JAK3);ncbi_396554(COMP);ncbi_100525120(HGF);ncbi_100127158(RPS6KB1);n…	K05091+K06591+K04347+K07198+K00693+K05453+K04456+K05465+K06493+K05448+K09487+K05459+K04355+K04570+K05071+K05055+K11218+K04659+K05460+K04688+K06240+K04358+K02649+K06525+K00922+K04538+K05870+K04450+K03099+K19719+K04354+K03099+K04465	Com_27274_pos	C00020
Metabolism	Amino acid metabolism	Lysine degradation	8	58	0.0632357	0.254816	4	ko00310	ncbi_100152303(ACAT2);ncbi_100521358(KMT5B);ncbi_100157885(SETDB2);ncbi_100626704(SETD7);ncbi_100628131(KMT2E);ncbi_100520868(NSD3);ncbi_100155920(ASH1L);ncbi_100623101(SETD2)	K00626+K11429+K18494+K11431+K09189+K11425+K06101+K11423	Com_8813_pos;Com_10028_pos;Com_11095_neg;Com_6565_neg	C02727+C00047+C00449+C00489
Organismal Systems	Nervous system	Long-term depression	8	58	0.0632357	0.254816	2	ko04730	ncbi_654405(GNAQ);ncbi_733640(PRKG1);ncbi_397491(IGF1);ncbi_100520687(PLA2G4A);ncbi_100516581(PLCB4);ncbi_100152679(PLCB1);ncbi_100517279(ITPR2);ncbi_100516976(GNAO1)	K04634+K07376+K05459+K16342+K05858+K05858+K04959+K04534	Com_308_neg;Com_5_neg	C00025+C00219
Environmental Information Processing	Signal transduction	AMPK signaling pathway	14	121	0.06392	0.254816	4	ko04152	ncbi_100233197(PFKFB1);ncbi_751859(SIRT1);ncbi_100145903(PRKAA1);ncbi_574064(GYS1);ncbi_100513811(AKT3);ncbi_396670(SCD);ncbi_397491(IGF1);ncbi_100127158(RPS6KB1);ncbi_100516289(PFKFB3);ncbi_100511937(LOC100511937);ncbi_100621789(PIK3CA);ncbi_100736562(CREB1);ncbi_100620726(CAB39);ncbi_100737053(PPP2R2C)	K19028+K11411+K07198+K00693+K04456+K00507+K05459+K04688+K01103+K02649+K00922+K05870+K08272+K04354	Com_27274_pos;Com_24643_pos;Com_4049_neg;Com_8323_neg	C00020+C00003+C00003+C04677
Organismal Systems	Nervous system	Serotonergic synapse	13	111	0.0670141	0.256318	14	ko04726	ncbi_654405(GNAQ);ncbi_100270820(GNG12);ncbi_397432(HTR2A);ncbi_397590(PTGS2);ncbi_397541(PTGS1);ncbi_100520687(PLA2G4A);ncbi_100623476(HTR6);ncbi_100516581(PLCB4);ncbi_100524280(GNB4);ncbi_100152679(PLCB1);ncbi_100517279(ITPR2);ncbi_100518733(CACNA1C);ncbi_100516976(GNAO1)	K04634+K04347+K04157+K11987+K00509+K16342+K04162+K05858+K04538+K05858+K04959+K04850+K04534	Com_9468_pos;Com_2176_pos;Com_36850_pos;Com_7196_pos;Com_1426_pos;Com_13899_pos;Com_18786_neg;Com_5515_neg;Com_2275_neg;Com_2258_neg;Com_11596_neg;Com_1951_neg;Com_4508_neg;Com_5_neg	C05957+C05954+C05635+C02166+C00643+C05635+C00575+C00078+C05965+C02165+C05953+C05356+C00696+C00219
Organismal Systems	Environmental adaptation	Circadian rhythm	5	30	0.0675577	0.256318	1	ko04710	ncbi_100145903(PRKAA1);ncbi_100514873(BHLHE40);ncbi_100626912(BHLHE41);ncbi_100736562(CREB1);ncbi_100628097(CLOCK)	K07198+K03729+K03730+K05870+K02223	Com_18786_neg	C00575
Metabolism	Carbohydrate metabolism	Amino sugar and nucleotide sugar metabolism	7	49	0.0681871	0.256318	4	ko00520	ncbi_494561(HK2);ncbi_100152344(HK1);ncbi_397566(PGM1);ncbi_100156649(UAP1);ncbi_100518539(GFPT2);ncbi_100522261(PGM2);ncbi_100516092(GNPDA2)	K00844+K00844+K01835+K00972+K00820+K15779+K02564	Com_38009_pos;Com_1597_pos;Com_4817_neg;Com_6759_neg	C00329+C00270+C00167+C00259
Human Diseases	Substance dependence	Morphine addiction	11	90	0.0686282	0.256318	4	ko05032	ncbi_606743(ADORA1);ncbi_100270820(GNG12);ncbi_100521141(ARRB1);ncbi_100622617(GABRA2);ncbi_100511175(GABBR2);ncbi_100524280(GNB4);ncbi_100152819(PDE1A);ncbi_100037970(PDE4C);ncbi_100514402(ADCY3);ncbi_100622999(ADCY8);ncbi_100516976(GNAO1)	K04265+K04347+K04439+K05175+K04615+K04538+K13755+K13293+K08043+K08048+K04534	Com_27274_pos;Com_190_pos;Com_22_pos;Com_18786_neg	C00020+C00212+C03758+C00575
Human Diseases	Cancers	Central carbon metabolism in cancer	8	59	0.0686412	0.256318	12	ko05230	ncbi_396810(KIT);ncbi_494561(HK2);ncbi_100286871(PDK1);ncbi_100152344(HK1);ncbi_100513811(AKT3);ncbi_100511937(LOC100511937);ncbi_100621789(PIK3CA);ncbi_102164419(SLC2A1)	K05091+K00844+K12077+K00844+K04456+K02649+K00922+K07299	Com_17_pos;Com_225_pos;Com_489_neg;Com_754_neg;Com_308_neg;Com_71_neg;Com_2837_neg;Com_3253_neg;Com_2068_neg;Com_5515_neg;Com_1305_neg;Com_5238_neg	C00079+C00073+C00158+C00135+C00025+C00082+C00049+C00062+C00074+C00078+C00149+C00122
Organismal Systems	Endocrine system	Thyroid hormone signaling pathway	13	112	0.0709414	0.258367	1	ko04919	ncbi_414379(DIO2);ncbi_574068(NCOA1);ncbi_100135658(NCOA2);ncbi_100513811(AKT3);ncbi_397063(ITGB3);ncbi_396776(THRB);ncbi_100515423(MED14);ncbi_100516581(PLCB4);ncbi_100511937(LOC100511937);ncbi_100621789(PIK3CA);ncbi_100626923(KAT2B);ncbi_100152679(PLCB1);ncbi_102164419(SLC2A1)	K17904+K09101+K11255+K04456+K06493+K08362+K15156+K05858+K02649+K00922+K06062+K05858+K07299	Com_18786_neg	C00575
Organismal Systems	Endocrine system	Prolactin signaling pathway	9	70	0.073023	0.259859	6	ko04917	ncbi_100037966(SOCS2);ncbi_100302366(SOCS4);ncbi_100302367(SOCS5);ncbi_100513811(AKT3);ncbi_396610(MAPK8);ncbi_100511937(LOC100511937);ncbi_100621789(PIK3CA);ncbi_100520187(SOS1);ncbi_100156602(SOS2)	K04695+K04697+K04698+K04456+K04440+K02649+K00922+K03099+K03099	Com_33974_pos;Com_22_pos;Com_5124_pos;Com_43797_pos;Com_2319_pos;Com_71_neg	C00280+C03758+C00951+C00468+C00355+C00082
Metabolism	Carbohydrate metabolism	Galactose metabolism	5	31	0.0758629	0.260243	4	ko00052	ncbi_494561(HK2);ncbi_100152344(HK1);ncbi_397566(PGM1);ncbi_100522261(PGM2);ncbi_100623494(MGAM2)	K00844+K00844+K01835+K15779+K12047	Com_617_pos;Com_992_neg;Com_5747_neg;Com_3294_neg	C00492+C00137+C00111+C02262
Human Diseases	Infectious diseases	Amoebiasis	11	92	0.0777799	0.260243	3	ko05146	ncbi_654405(GNAQ);ncbi_100048958(GNA14);ncbi_100126851(SERPINB9);ncbi_397115(ARG1);ncbi_100511642(LAMA3);ncbi_100516581(PLCB4);ncbi_100626904(IL1R1);ncbi_100511937(LOC100511937);ncbi_397084(TGFB2);ncbi_100621789(PIK3CA);ncbi_100152679(PLCB1)	K04634+K04636+K13963+K01476+K06240+K05858+K04386+K02649+K13376+K00922+K05858	Com_18786_neg;Com_3253_neg;Com_5_neg	C00575+C00062+C00219
Metabolism	Carbohydrate metabolism	Inositol phosphate metabolism	9	71	0.0784172	0.260243	4	ko00562	ncbi_503700(PIK3C3);ncbi_100152243(MINPP1);ncbi_100512551(PIK3C2B);ncbi_100144587(INPP5F);ncbi_100521692(PIKFYVE);ncbi_100516581(PLCB4);ncbi_100621789(PIK3CA);ncbi_100623323(IPMK);ncbi_100152679(PLCB1)	K00914+K03103+K00923+K21798+K00921+K05858+K00922+K00915+K05858	Com_21121_pos;Com_15334_neg;Com_992_neg;Com_5747_neg	C01204+C01220+C00137+C00111
Organismal Systems	Digestive system	Carbohydrate digestion and absorption	6	41	0.0800819	0.260243	3	ko04973	ncbi_494561(HK2);ncbi_100152344(HK1);ncbi_100513811(AKT3);ncbi_100511937(LOC100511937);ncbi_100621789(PIK3CA);ncbi_100623494(MGAM2)	K00844+K00844+K04456+K02649+K00922+K12047	Com_1543_pos;Com_140_pos;Com_98_neg	C00208+C00208+C01835
Metabolism	Xenobiotics biodegradation and metabolism	Drug metabolism - other enzymes	8	61	0.0802784	0.260243	4	ko00983	ncbi_100515954(CDA);ncbi_100152603(UGT1A6);ncbi_100153094(LOC100153094);ncbi_397478(CES1);ncbi_100157205(RRM2B);ncbi_100512255(GMPS);ncbi_100625277(UPP1);MSTRG.59844(Ces1d)	K01489+K00699+K00799+K01044+K10808+K01951+K00757+K01044	Com_27527_pos;Com_24643_pos;Com_4049_neg;Com_6221_neg	C07054+C00003+C00003+C16641
Human Diseases	Cardiovascular diseases	Dilated cardiomyopathy (DCM)	10	83	0.0863768	0.276969	1	ko05414	ncbi_100037284(ITGB8);ncbi_397063(ITGB3);ncbi_397377(CACNA2D1);ncbi_397491(IGF1);ncbi_397084(TGFB2);ncbi_100521988(ITGB4);ncbi_100525250(CACNG5);ncbi_100514402(ADCY3);ncbi_100622999(ADCY8);ncbi_100518733(CACNA1C)	K06591+K06493+K04858+K05459+K13376+K06525+K04870+K08043+K08048+K04850	Com_18786_neg	C00575
Environmental Information Processing	Signal transduction	FoxO signaling pathway	14	130	0.10136	0.302033	2	ko04068	ncbi_100101922(ATM);ncbi_751859(SIRT1);ncbi_100145903(PRKAA1);ncbi_100513811(AKT3);ncbi_397491(IGF1);ncbi_396610(MAPK8);ncbi_100523979(CCNG2);ncbi_100624868(BNIP3);ncbi_100626704(SETD7);ncbi_100511937(LOC100511937);ncbi_397084(TGFB2);ncbi_100621789(PIK3CA);ncbi_100520187(SOS1);ncbi_100156602(SOS2)	K04728+K11411+K07198+K04456+K05459+K04440+K10146+K15464+K11431+K02649+K13376+K00922+K03099+K03099	Com_27274_pos;Com_308_neg	C00020+C00025
Environmental Information Processing	Signal transduction	VEGF signaling pathway	7	55	0.110798	0.320447	1	ko04370	ncbi_100513811(AKT3);ncbi_397157(VEGFA);ncbi_397590(PTGS2);ncbi_100520687(PLA2G4A);ncbi_100519210(SPHK1);ncbi_100511937(LOC100511937);ncbi_100621789(PIK3CA)	K04456+K05448+K11987+K16342+K04718+K02649+K00922	Com_13965_pos	C01312
Environmental Information Processing	Signal transduction	Phospholipase D signaling pathway	15	144	0.114012	0.323399	2	ko04072	ncbi_396810(KIT);ncbi_100513811(AKT3);ncbi_100520687(PLA2G4A);ncbi_100519210(SPHK1);ncbi_100516581(PLCB4);ncbi_100170851(PTPN11);ncbi_100511937(LOC100511937);ncbi_100157742(DGKH);ncbi_100621398(MRAS);ncbi_100621789(PIK3CA);ncbi_100152679(PLCB1);ncbi_100520187(SOS1);ncbi_100514402(ADCY3);ncbi_100622999(ADCY8);ncbi_100156602(SOS2)	K05091+K04456+K16342+K04718+K05858+K07293+K02649+K00901+K07831+K00922+K05858+K03099+K08043+K08048+K03099	Com_308_neg;Com_18786_neg	C00025+C00575
Organismal Systems	Endocrine system	Melanogenesis	11	99	0.115587	0.324745	2	ko04916	ncbi_654405(GNAQ);ncbi_396810(KIT);ncbi_100521912(WNT11);ncbi_100627056(WNT5A);ncbi_100516581(PLCB4);ncbi_100736562(CREB1);ncbi_100152679(PLCB1);ncbi_100514402(ADCY3);ncbi_100622999(ADCY8);ncbi_100626947(WNT7B);ncbi_100516976(GNAO1)	K04634+K05091+K01384+K00444+K05858+K05870+K05858+K08043+K08048+K00572+K04534	Com_71_neg;Com_18786_neg	C00082+C00575
Cellular Processes	Cell growth and death	Oocyte meiosis	12	112	0.126178	0.347873	1	ko04114	ncbi_100415776(ANAPC13);ncbi_397491(IGF1);ncbi_100156642(SLK);ncbi_100517185(CDC27);ncbi_100521758(CPEB4);ncbi_100151864(SMC3);ncbi_100152117(CPEB3);ncbi_100522174(RPS6KA3);ncbi_100515304(STAG3);ncbi_100514402(ADCY3);ncbi_100622999(ADCY8);ncbi_100517279(ITPR2)	K12456+K05459+K08836+K03350+K02602+K06669+K02602+K04373+K13055+K08043+K08048+K04959	Com_18786_neg	C00575
Organismal Systems	Endocrine system	Ovarian Steroidogenesis	6	47	0.132697	0.361118	9	ko04913	ncbi_733634(AKR1C1);ncbi_397491(IGF1);ncbi_397590(PTGS2);ncbi_100520687(PLA2G4A);ncbi_100514402(ADCY3);ncbi_100622999(ADCY8)	K04119+K05459+K11987+K16342+K08043+K08048	Com_33974_pos;Com_25418_pos;Com_40620_pos;Com_5124_pos;Com_43797_pos;Com_36804_pos;Com_18786_neg;Com_1951_neg;Com_5_neg	C00280+C00535+C00187+C00951+C00468+C01953+C00575+C05356+C00219
Environmental Information Processing	Signal transduction	Calcium signaling pathway	18	183	0.133612	0.361118	2	ko04020	ncbi_654405(GNAQ);ncbi_100048958(GNA14);ncbi_397432(HTR2A);ncbi_397636(ATP2B1);ncbi_397651(VDAC3);ncbi_497623(P2RX7);ncbi_100623476(HTR6);ncbi_100519210(SPHK1);ncbi_100516581(PLCB4);ncbi_100524288(MYLK2);ncbi_100152819(PDE1A);ncbi_100152679(PLCB1);ncbi_100520061(ATP2B3);ncbi_100514402(ADCY3);ncbi_100622999(ADCY8);ncbi_100517279(ITPR2);ncbi_100518733(CACNA1C);ncbi_100154640(CACNA1I)	K04634+K04636+K04157+K05850+K15041+K05220+K04162+K04718+K05858+K00907+K13755+K05858+K05850+K08043+K08048+K04959+K04850+K04856	Com_5511_neg;Com_18786_neg	C13050+C00575
Environmental Information Processing	Signal transduction	mTOR signaling pathway	15	148	0.134654	0.361118	1	ko04150	ncbi_100145903(PRKAA1);ncbi_100513811(AKT3);ncbi_397491(IGF1);ncbi_100127158(RPS6KB1);ncbi_100521912(WNT11);ncbi_100627056(WNT5A);ncbi_100522174(RPS6KA3);ncbi_100511937(LOC100511937);ncbi_100621789(PIK3CA);ncbi_100153677(CLIP1);ncbi_100620726(CAB39);ncbi_100520187(SOS1);ncbi_100626947(WNT7B);ncbi_100515777(LRP6);ncbi_100156602(SOS2)	K07198+K04456+K05459+K04688+K01384+K00444+K04373+K02649+K00922+K10421+K08272+K03099+K00572+K03068+K03099	Com_27274_pos	C00020
Organismal Systems	Circulatory system	Adrenergic signaling in cardiomyocytes	14	137	0.138144	0.367141	2	ko04261	ncbi_654405(GNAQ);ncbi_100513811(AKT3);ncbi_397377(CACNA2D1);ncbi_397636(ATP2B1);ncbi_100516581(PLCB4);ncbi_100525250(CACNG5);ncbi_100736562(CREB1);ncbi_100513441(ATF2);ncbi_100152679(PLCB1);ncbi_100520061(ATP2B3);ncbi_100514402(ADCY3);ncbi_100622999(ADCY8);ncbi_100518733(CACNA1C);ncbi_100737053(PPP2R2C)	K04634+K04456+K04858+K05850+K05858+K04870+K05870+K04450+K05858+K05850+K08043+K08048+K04850+K04354	Com_10082_pos;Com_18786_neg	C00788+C00575
Organismal Systems	Digestive system	Gastric acid secretion	8	72	0.163429	0.426652	2	ko04971	ncbi_654405(GNAQ);ncbi_397293(KCNJ2);ncbi_100516581(PLCB4);ncbi_100524288(MYLK2);ncbi_100152679(PLCB1);ncbi_100514402(ADCY3);ncbi_100622999(ADCY8);ncbi_100517279(ITPR2)	K04634+K04996+K05858+K00907+K05858+K08043+K08048+K04959	Com_6717_pos;Com_18786_neg	C01996+C00575
Human Diseases	Neurodegenerative diseases	Parkinson disease	14	142	0.168397	0.431736	6	ko05012	ncbi_780403(LRRK2);ncbi_100156288(NDUFA4L2);ncbi_397651(VDAC3);ncbi_100520312(NDUFA3);ncbi_110257420(LOC110257420);ncbi_808501(ND1);ncbi_808502(ND2);ncbi_808504(COX2);ncbi_808505(ATP8);ncbi_808506(ATP6);ncbi_808508(ND3);ncbi_808509(ND4L);ncbi_808510(ND4);ncbi_808511(ND5)	K08844+K03948+K15041+K03947+K02263+K03878+K03879+K02261+K02125+K02126+K03880+K03882+K03881+K03883	Com_27274_pos;Com_190_pos;Com_22_pos;Com_2319_pos;Com_71_neg;Com_18786_neg	C00020+C00212+C03758+C00355+C00082+C00575
Organismal Systems	Nervous system	GABAergic synapse	9	84	0.169522	0.431736	2	ko04727	ncbi_100270820(GNG12);ncbi_100622617(GABRA2);ncbi_100511477(TRAK2);ncbi_100511175(GABBR2);ncbi_100524280(GNB4);ncbi_100514402(ADCY3);ncbi_100622999(ADCY8);ncbi_100518733(CACNA1C);ncbi_100516976(GNAO1)	K04347+K05175+K15374+K04615+K04538+K08043+K08048+K04850+K04534	Com_308_neg;Com_18786_neg	C00025+C00575
Metabolism	Metabolism of other amino acids	Glutathione metabolism	6	51	0.174942	0.437356	7	ko00480	ncbi_100153094(LOC100153094);ncbi_100157205(RRM2B);ncbi_100519691(GPX8);ncbi_100522018(GCLC);ncbi_396625(GSR);ncbi_100153052(SMS)	K00799+K10808+K00432+K11204+K00383+K00802	Com_136_pos;Com_92_pos;Com_28093_pos;Com_56_pos;Com_308_neg;Com_24128_neg;Com_9531_neg	C00750+C00315+C00051+C01879+C00025+C03740+C00072
Organismal Systems	Immune system	Fc epsilon RI signaling pathway	7	64	0.195112	0.458004	5	ko04664	ncbi_100513811(AKT3);ncbi_396610(MAPK8);ncbi_100520687(PLA2G4A);ncbi_100511937(LOC100511937);ncbi_100621789(PIK3CA);ncbi_100520187(SOS1);ncbi_100156602(SOS2)	K04456+K04440+K16342+K02649+K00922+K03099+K03099	Com_7312_pos;Com_7196_pos;Com_13476_pos;Com_4508_neg;Com_5_neg	C05951+C02166+C05952+C00696+C00219
Organismal Systems	Nervous system	Long-term potentiation	7	64	0.195112	0.458004	2	ko04720	ncbi_654405(GNAQ);ncbi_100516581(PLCB4);ncbi_100522174(RPS6KA3);ncbi_100152679(PLCB1);ncbi_100622999(ADCY8);ncbi_100517279(ITPR2);ncbi_100518733(CACNA1C)	K04634+K05858+K04373+K05858+K08048+K04959+K04850	Com_308_neg;Com_18786_neg	C00025+C00575
Metabolism	Metabolism of terpenoids and polyketides	Terpenoid backbone biosynthesis	3	21	0.201522	0.461304	2	ko00900	ncbi_100153932(FDPS);ncbi_100152303(ACAT2);ncbi_100739526(GGPS1)	K00787+K00626+K00804	Com_2224_neg;Com_14600_neg	C00353+C00418
Metabolism	Carbohydrate metabolism	Fructose and mannose metabolism	4	32	0.210905	0.474939	2	ko00051	ncbi_494561(HK2);ncbi_100233197(PFKFB1);ncbi_100152344(HK1);ncbi_100516289(PFKFB3)	K00844+K19028+K00844+K01103	Com_5747_neg;Com_999_neg	C00111+C00392
Organismal Systems	Digestive system	Pancreatic secretion	9	89	0.213915	0.478067	3	ko04972	ncbi_654405(GNAQ);ncbi_397434(KCNMA1);ncbi_397636(ATP2B1);ncbi_100516581(PLCB4);ncbi_100152679(PLCB1);ncbi_100520061(ATP2B3);ncbi_100514402(ADCY3);ncbi_100622999(ADCY8);ncbi_100517279(ITPR2)	K04634+K04936+K05850+K05858+K05858+K05850+K08043+K08048+K04959	Com_6717_pos;Com_5511_neg;Com_18786_neg	C01996+C13050+C00575
Human Diseases	Infectious diseases	African trypanosomiasis	4	33	0.227024	0.503551	3	ko05143	ncbi_654405(GNAQ);ncbi_396826(FAS);ncbi_100516581(PLCB4);ncbi_100152679(PLCB1)	K04634+K04390+K05858+K05858	Com_4186_neg;Com_5515_neg;Com_4508_neg	C00328+C00078+C00696
Metabolism	Metabolism of cofactors and vitamins	Retinol metabolism	6	57	0.246783	0.525019	1	ko00830	ncbi_100152603(UGT1A6);ncbi_403104(CYP2B22);ncbi_100519223(DHRS9);ncbi_100517137(ALDH1A1);ncbi_106510546(LOC106510546);ncbi_100512795(LOC100512795)	K00699+K07412+K11149+K07249+K07420+K13951	Com_24341_neg	C16677
Human Diseases	Cancers	Prostate cancer	9	93	0.252377	0.531795	6	ko05215	ncbi_396769(MMP3);ncbi_100513811(AKT3);ncbi_397191(HSP90B1);ncbi_397491(IGF1);ncbi_100511937(LOC100511937);ncbi_100621789(PIK3CA);ncbi_100736562(CREB1);ncbi_100520187(SOS1);ncbi_100156602(SOS2)	K01394+K04456+K09487+K05459+K02649+K00922+K05870+K03099+K03099	Com_33974_pos;Com_25418_pos;Com_5124_pos;Com_8549_pos;Com_20746_pos;Com_1105_pos	C00280+C00535+C00951+C00735+C00735+C00762
Metabolism	Lipid metabolism	Biosynthesis of unsaturated fatty acids	3	24	0.26216	0.544629	11	ko01040	ncbi_444995(FADS1);ncbi_444997(FADS2);ncbi_396670(SCD)	K10224+K10226+K00507	Com_869_pos;Com_77_pos;Com_353_neg;Com_11_neg;Com_8_neg;Com_46_neg;Com_588_neg;Com_810_neg;Com_331_neg;Com_5_neg;Com_19_neg	C06428+C16513+C08323+C16527+C06429+C06428+C16533+C08281+C08316+C00219+C03242
Metabolism	Energy metabolism	Oxidative phosphorylation	12	132	0.274595	0.562539	3	ko00190	ncbi_100156288(NDUFA4L2);ncbi_100520312(NDUFA3);ncbi_110257420(LOC110257420);ncbi_808501(ND1);ncbi_808502(ND2);ncbi_808504(COX2);ncbi_808505(ATP8);ncbi_808506(ATP6);ncbi_808508(ND3);ncbi_808509(ND4L);ncbi_808510(ND4);ncbi_808511(ND5)	K03948+K03947+K02263+K03878+K03879+K02261+K02125+K02126+K03880+K03882+K03881+K03883	Com_24643_pos;Com_4049_neg;Com_5238_neg	C00003+C00003+C00122
Human Diseases	Cancers	Choline metabolism in cancer	9	96	0.282611	0.57103	2	ko05231	ncbi_100513811(AKT3);ncbi_396610(MAPK8);ncbi_100520687(PLA2G4A);ncbi_100127158(RPS6KB1);ncbi_100511937(LOC100511937);ncbi_100157742(DGKH);ncbi_100621789(PIK3CA);ncbi_100520187(SOS1);ncbi_100156602(SOS2)	K04456+K04440+K16342+K04688+K02649+K00901+K00922+K03099+K03099	Com_233_pos;Com_634_pos	C00114+C00670
Human Diseases	Substance dependence	Alcoholism	13	147	0.296432	0.59086	6	ko05034	ncbi_100270820(GNG12);ncbi_100154511(HIST1H3E);ncbi_397495(BDNF);ncbi_100522201(LOC100522201);ncbi_100524280(GNB4);ncbi_100736562(CREB1);ncbi_100513441(ATF2);ncbi_100621538(LOC100621538);ncbi_100520187(SOS1);ncbi_102161782(LOC102161782);ncbi_110255273(LOC110255273);ncbi_100516976(GNAO1);ncbi_100156602(SOS2)	K04347+K11253+K04355+K11251+K04538+K05870+K04450+K11251+K03099+K11253+K11252+K04534+K03099	Com_190_pos;Com_22_pos;Com_2319_pos;Com_308_neg;Com_71_neg;Com_18786_neg	C00212+C03758+C00355+C00025+C00082+C00575
Human Diseases	Cancers	Chemical carcinogenesis	6	61	0.298682	0.591351	2	ko05204	ncbi_100152603(UGT1A6);ncbi_100153094(LOC100153094);ncbi_396640(SULT1A3);ncbi_397590(PTGS2);ncbi_403104(CYP2B22);ncbi_100512795(LOC100512795)	K00699+K00799+K01014+K11987+K07412+K13951	Com_10405_pos;Com_11582_pos	C06800+C16453
Metabolism	Lipid metabolism	Arachidonic acid metabolism	6	62	0.311987	0.602365	14	ko00590	ncbi_733634(AKR1C1);ncbi_397590(PTGS2);ncbi_403104(CYP2B22);ncbi_397541(PTGS1);ncbi_100520687(PLA2G4A);ncbi_100519691(GPX8)	K04119+K11987+K07412+K00509+K16342+K00432	Com_14472_pos;Com_9468_pos;Com_2176_pos;Com_13965_pos;Com_1863_pos;Com_7312_pos;Com_7196_pos;Com_13476_pos;Com_2275_neg;Com_2258_neg;Com_11596_neg;Com_1951_neg;Com_4508_neg;Com_5_neg	C14732+C05957+C05954+C01312+C05950+C05951+C02166+C05952+C05965+C02165+C05953+C05356+C00696+C00219
Metabolism	Energy metabolism	Nitrogen metabolism	2	16	0.335756	0.63902	1	ko00910	ncbi_100152792(CA9);ncbi_100152749(CA12)	K01672+K01672	Com_308_neg	C00025
Organismal Systems	Sensory system	Taste transduction	6	67	0.379577	0.691205	11	ko04742	ncbi_100515171(LOC100515171);ncbi_100622617(GABRA2);ncbi_100511175(GABBR2);ncbi_100152819(PDE1A);ncbi_100622999(ADCY8);ncbi_100518733(CACNA1C)	K04834+K05175+K04615+K13755+K08048+K04850	Com_6717_pos;Com_27274_pos;Com_1543_pos;Com_140_pos;Com_31514_pos;Com_6944_pos;Com_489_neg;Com_308_neg;Com_28_neg;Com_18786_neg;Com_1305_neg	C01996+C00020+C00208+C00208+C06526+C00144+C00158+C00025+C02265+C00575+C00149
Metabolism	Nucleotide metabolism	Purine metabolism	14	171	0.392285	0.709963	18	ko00230	ncbi_100642182(PNPT1);ncbi_397566(PGM1);ncbi_100157205(RRM2B);ncbi_100154612(NT5C2);ncbi_100519356(POLR3G);ncbi_100522261(PGM2);ncbi_100519388(ADPRM);ncbi_100512255(GMPS);ncbi_100152819(PDE1A);ncbi_100037970(PDE4C);ncbi_100514402(ADCY3);ncbi_100622999(ADCY8);ncbi_100153508(NPR1);ncbi_397616(PDE5A)	K00962+K01835+K10808+K01081+K03024+K15779+K01517+K01951+K13755+K13293+K08043+K08048+K12323+K13762	Com_170_pos;Com_27274_pos;Com_62_pos;Com_190_pos;Com_153_pos;Com_5664_pos;Com_13518_pos;Com_6464_pos;Com_6944_pos;Com_10338_neg;Com_3197_neg;Com_559_neg;Com_79_neg;Com_18786_neg;Com_20606_neg;Com_850_neg;Com_8887_neg;Com_8323_neg	C00294+C00020+C00262+C00212+C00147+C00385+C05512+C00559+C00144+C05512+C00366+C00242+C00387+C00575+C00301+C00385+C01762+C04677
Organismal Systems	Excretory system	Vasopressin-regulated water reabsorption	4	43	0.397786	0.71553	1	ko04962	ncbi_100154566(DYNC1I2);ncbi_100736562(CREB1);ncbi_110259957(ARHGDIG);ncbi_100514402(ADCY3)	K10415+K05870+K12462+K08043	Com_18786_neg	C00575
Metabolism	Carbohydrate metabolism	Propanoate metabolism	3	31	0.407805	0.721974	2	ko00640	ncbi_397129(DLD);ncbi_100152303(ACAT2);ncbi_100156530(DBT)	K00382+K00626+K09699	Com_5747_neg;Com_2034_neg	C00111+C02170
Organismal Systems	Immune system	Fc gamma R-mediated phagocytosis	7	82	0.408754	0.721974	1	ko04666	ncbi_497233(CFL2);ncbi_100134857(NCF1);ncbi_100513811(AKT3);ncbi_100127158(RPS6KB1);ncbi_100519210(SPHK1);ncbi_100511937(LOC100511937);ncbi_100621789(PIK3CA)	K05765+K08011+K04456+K04688+K04718+K02649+K00922	Com_5_neg	C00219
Environmental Information Processing	Signal transduction	Hedgehog signaling pathway	4	44	0.414979	0.721974	1	ko04340	ncbi_100525739(KIF3A);ncbi_100521141(ARRB1);ncbi_100511787(CUL3);ncbi_100519689(LRP2)	K10394+K04439+K03869+K06233	Com_18786_neg	C00575
Metabolism	Lipid metabolism	Steroid biosynthesis	2	19	0.417622	0.721974	1	ko00100	ncbi_100113409(SQLE);ncbi_100628197(DHCR24)	K00511+K09828	Com_40620_pos	C00187
Metabolism	Metabolism of cofactors and vitamins	Pantothenate and CoA biosynthesis	2	19	0.417622	0.721974	4	ko00770	ncbi_100525064(AASDHPPT);ncbi_100512746(PANK3)	K06133+K09680	Com_156_pos;Com_1934_pos;Com_2837_neg;Com_1838_neg	C00864+C00141+C00049+C00106
Organismal Systems	Immune system	Leukocyte transendothelial migration	9	110	0.432181	0.730984	1	ko04670	ncbi_100134857(NCF1);ncbi_100271931(THY1);ncbi_100157760(MYL9);ncbi_397447(ROCK1);ncbi_100520849(ARHGAP5);ncbi_397445(ROCK2);ncbi_100170851(PTPN11);ncbi_100511937(LOC100511937);ncbi_100621789(PIK3CA)	K08011+K06514+K12755+K04514+K13709+K17388+K07293+K02649+K00922	Com_18786_neg	C00575
Metabolism	Metabolism of cofactors and vitamins	Riboflavin metabolism	1	8	0.460836	0.76806	3	ko00740	ncbi_100625219(BLVRB)	K05901	Com_711_neg;Com_2951_neg;Com_7240_neg	C00199+C00255+C00016
Metabolism	Amino acid metabolism	Arginine and proline metabolism	4	48	0.482383	0.786204	12	ko00330	ncbi_100037299(P4HA1);ncbi_397115(ARG1);ncbi_100155925(AMD1);ncbi_100153052(SMS)	K00472+K01476+K01611+K00802	Com_1009_pos;Com_136_pos;Com_196_pos;Com_92_pos;Com_17389_pos;Com_22196_pos;Com_27076_pos;Com_37822_pos;Com_1036_neg;Com_308_neg;Com_3253_neg;Com_1760_neg	C00791+C00750+C00300+C00315+C01157+C04137+C01035+C00019+C02305+C00025+C00062+C02946
Metabolism	Lipid metabolism	alpha-Linolenic acid metabolism	2	22	0.494082	0.796471	1	ko00592	ncbi_444997(FADS2);ncbi_100520687(PLA2G4A)	K10226+K16342	Com_20425_pos	C11512
Metabolism	Xenobiotics biodegradation and metabolism	Metabolism of xenobiotics by cytochrome P450	4	49	0.498771	0.798775	3	ko00980	ncbi_100152603(UGT1A6);ncbi_100153094(LOC100153094);ncbi_106510546(LOC106510546);ncbi_100512795(LOC100512795)	K00699+K00799+K07420+K13951	Com_10405_pos;Com_11582_pos;Com_5527_neg	C06800+C16453+C11713
Metabolism	Amino acid metabolism	Valine, leucine and isoleucine degradation	4	50	0.514933	0.814394	2	ko00280	ncbi_397129(DLD);ncbi_100154810(ACADSB);ncbi_100152303(ACAT2);ncbi_100156530(DBT)	K00382+K09478+K00626+K09699	Com_1934_pos;Com_2034_neg	C00141+C02170
Metabolism	Carbohydrate metabolism	Pyruvate metabolism	3	37	0.525528	0.815951	4	ko00620	ncbi_397129(DLD);ncbi_100152303(ACAT2);ncbi_100624780(HAGH)	K00382+K00626+K01069	Com_2463_pos;Com_2068_neg;Com_1305_neg;Com_5238_neg	C02504+C00074+C00149+C00122
Organismal Systems	Excretory system	Aldosterone-regulated sodium reabsorption	3	37	0.525528	0.815951	4	ko04960	ncbi_397491(IGF1);ncbi_100511937(LOC100511937);ncbi_100621789(PIK3CA)	K05459+K02649+K00922	Com_8549_pos;Com_20746_pos;Com_1105_pos;Com_18786_neg	C00735+C00735+C00762+C00575
Human Diseases	Substance dependence	Nicotine addiction	3	38	0.543895	0.835672	2	ko05033	ncbi_100516491(CHRNB2);ncbi_100514772(SLC17A7);ncbi_100622617(GABRA2)	K04813+K12302+K05175	Com_6717_pos;Com_308_neg	C01996+C00025
Organismal Systems	Digestive system	Mineral absorption	3	39	0.561844	0.856777	4	ko04978	ncbi_397417(MT1A);ncbi_100169932(TRPM7);ncbi_100623287(STEAP2)	K14739+K04982+K14738	Com_4291_pos;Com_17_pos;Com_225_pos;Com_5515_neg	C00188+C00079+C00073+C00078
Metabolism	Metabolism of cofactors and vitamins	Ubiquinone and other terpenoid-quinone biosynthesis	1	11	0.5724	0.865938	6	ko00130	ncbi_100286873(NQO1)	K00355	Com_13721_pos;Com_288_neg;Com_71_neg;Com_4434_neg;Com_9718_neg;Com_2224_neg	C00544+C00423+C00082+C01179+C02483+C00353
Metabolism	Nucleotide metabolism	Pyrimidine metabolism	7	96	0.577003	0.868449	11	ko00240	ncbi_100515954(CDA);ncbi_100642182(PNPT1);ncbi_100157205(RRM2B);ncbi_100154612(NT5C2);ncbi_100519356(POLR3G);ncbi_100621901(DCTPP1);ncbi_100625277(UPP1)	K01489+K00962+K10808+K01081+K03024+K16904+K00757	Com_2489_pos;Com_2801_pos;Com_1279_pos;Com_1170_neg;Com_53_neg;Com_2034_neg;Com_8134_neg;Com_19942_neg;Com_25688_neg;Com_1838_neg;Com_884_neg	C00475+C00380+C00105+C00214+C00299+C02170+C00112+C01346+C00364+C00106+C00055
Metabolism	Lipid metabolism	Fatty acid degradation	3	41	0.596423	0.887605	1	ko00071	ncbi_100154810(ACADSB);ncbi_100152303(ACAT2);ncbi_100512795(LOC100512795)	K09478+K00626+K13951	Com_6565_neg	C00489
Organismal Systems	Excretory system	Endocrine and other factor-regulated calcium reabsorption	3	42	0.613032	0.887605	2	ko04961	ncbi_654405(GNAQ);ncbi_100516581(PLCB4);ncbi_100152679(PLCB1)	K04634+K05858+K05858	Com_5124_pos;Com_18786_neg	C00951+C00575
Metabolism	Carbohydrate metabolism	Pentose phosphate pathway	2	28	0.62648	0.88807	2	ko00030	ncbi_397566(PGM1);ncbi_100522261(PGM2)	K01835+K15779	Com_711_neg;Com_2688_neg	C00199+C05382
Metabolism	Metabolism of cofactors and vitamins	Nicotinate and nicotinamide metabolism	2	29	0.64574	0.901745	8	ko00760	ncbi_100154612(NT5C2);ncbi_100512459(NUDT12)	K01081+K03426	Com_226_pos;Com_24643_pos;Com_22983_pos;Com_826_pos;Com_5747_neg;Com_2837_neg;Com_4049_neg;Com_5238_neg	C00153+C00003+C00455+C00455+C00111+C00049+C00003+C00122
Metabolism	Amino acid metabolism	Cysteine and methionine metabolism	3	45	0.660047	0.911352	8	ko00270	ncbi_100155925(AMD1);ncbi_100522018(GCLC);ncbi_100153052(SMS)	K01611+K11204+K00802	Com_225_pos;Com_1002_pos;Com_4549_pos;Com_28093_pos;Com_27705_pos;Com_37822_pos;Com_2837_neg;Com_6126_neg	C00073+C00170+C00606+C00051+C01817+C00019+C00049+C01005
Metabolism	Global and overview maps	Metabolic pathways	90	1254	0.663309	0.911352	158	ko01100	ncbi_503700(PIK3C3);ncbi_692156(ENO3);ncbi_733634(AKR1C1);ncbi_100037299(P4HA1);ncbi_100113409(SQLE);ncbi_494561(HK2);ncbi_100233193(MGLL);ncbi_100153932(FDPS);ncbi_574064(GYS1);ncbi_100156288(NDUFA4L2);ncbi_100157572(GALNT15);ncbi_100155736(LIPG);ncbi_100152344(HK1);ncbi_100628197(DHCR24);ncbi_100515954(CDA);ncbi_397566(PGM1);ncbi_100152603(UGT1A6);ncbi_397115(ARG1);ncbi_397129(DLD);ncbi_397478(…	K00914+K01689+K04119+K00472+K00511+K00844+K01054+K00787+K00693+K03948+K00710+K22284+K00844+K09828+K01489+K01835+K00699+K01476+K00382+K01044+K11987+K07412+K10808+K00509+K09478+K01230+K03103+K00626+K00972+K01081+K01611+K00820+K03024+K03947+K15779+K02564+K16342+K11149+K09680+K09653+K16904+K05901+K00923+K09699+K06240+K11204+K00804+K01689+K04718+K00710+K21798+K01951+K15374+K07819+K00921+K05858+K00737+…	Com_4291_pos;Com_33974_pos;Com_170_pos;Com_1009_pos;Com_2489_pos;Com_17_pos;Com_25418_pos;Com_233_pos;Com_226_pos;Com_2801_pos;Com_136_pos;Com_196_pos;Com_225_pos;Com_169_pos;Com_3922_pos;Com_27274_pos;Com_156_pos;Com_62_pos;Com_99_pos;Com_1937_pos;Com_13748_pos;Com_190_pos;Com_1002_pos;Com_153_pos;Com_16856_pos;Com_22_pos;Com_5664_pos;Com_40620_pos;Com_19473_pos;Com_14326_pos;Com_6710_pos;Com_15…	C00188+C00280+C00294+C00791+C00475+C00079+C00535+C00114+C00153+C00380+C00750+C00300+C00073+C00314+C01717+C00020+C00864+C00262+C00954+C00378+C00437+C00212+C00170+C00147+C05122+C03758+C00385+C00187+C05579+C00624+C07215+C00208+C00315+C02046+C01157+C00141+C05957+C00208+C02504+C16356+C00329+C00951+C05954+C05512+C03406+C05589+C05635+C01598+C04294+C00468+C00993+C00606+C00003+C00051+C01953+C00559+C02480+…
Metabolism	Carbohydrate metabolism	Glyoxylate and dicarboxylate metabolism	2	30	0.664206	0.911352	5	ko00630	ncbi_397129(DLD);ncbi_100152303(ACAT2)	K00382+K00626	Com_489_neg;Com_308_neg;Com_6714_neg;Com_11743_neg;Com_1305_neg	C00158+C00025+C01182+C00417+C00149
Metabolism	Xenobiotics biodegradation and metabolism	Drug metabolism - cytochrome P450	3	47	0.68902	0.923913	1	ko00982	ncbi_100152603(UGT1A6);ncbi_100153094(LOC100153094);ncbi_100512795(LOC100512795)	K00699+K00799+K13951	Com_12270_pos	C16560
Human Diseases	Substance dependence	Cocaine addiction	3	47	0.68902	0.923913	5	ko05030	ncbi_397495(BDNF);ncbi_100736562(CREB1);ncbi_100513441(ATF2)	K04355+K05870+K04450	Com_22_pos;Com_2319_pos;Com_308_neg;Com_71_neg;Com_18786_neg	C03758+C00355+C00025+C00082+C00575
Human Diseases	Cancers	Basal cell carcinoma	4	63	0.698462	0.926535	1	ko05217	ncbi_100517932(APC);ncbi_100521912(WNT11);ncbi_100627056(WNT5A);ncbi_100626947(WNT7B)	K02085+K01384+K00444+K00572	Com_40620_pos	C00187
Human Diseases	Substance dependence	Amphetamine addiction	4	64	0.710281	0.926535	5	ko05031	ncbi_751859(SIRT1);ncbi_100736562(CREB1);ncbi_100513441(ATF2);ncbi_100518733(CACNA1C)	K11411+K05870+K04450+K04850	Com_22_pos;Com_2319_pos;Com_308_neg;Com_71_neg;Com_18786_neg	C03758+C00355+C00025+C00082+C00575
Metabolism	Metabolism of cofactors and vitamins	Porphyrin and chlorophyll metabolism	2	33	0.714965	0.926535	4	ko00860	ncbi_100152603(UGT1A6);ncbi_100625219(BLVRB)	K00699+K05901	Com_4291_pos;Com_2085_pos;Com_308_neg;Com_14443_neg	C00188+C00931+C00025+C00486
Metabolism	Lipid metabolism	Steroid hormone biosynthesis	3	49	0.716102	0.926535	13	ko00140	ncbi_733634(AKR1C1);ncbi_100152603(UGT1A6);ncbi_403104(CYP2B22)	K04119+K00699+K07412	Com_33974_pos;Com_25418_pos;Com_40620_pos;Com_28650_pos;Com_5124_pos;Com_43797_pos;Com_36804_pos;Com_8549_pos;Com_20746_pos;Com_10212_pos;Com_19053_pos;Com_1105_pos;Com_7286_neg	C00280+C00535+C00187+C00523+C00951+C00468+C01953+C00735+C00735+C05285+C05141+C00762+C02140
Metabolism	Lipid metabolism	Primary bile acid biosynthesis	1	17	0.731129	0.931916	5	ko00120	ncbi_100157868(CH25H)	K10223	Com_16856_pos;Com_40620_pos;Com_20674_neg;Com_4463_neg;Com_3874_neg	C05122+C00187+C05466+C01921+C05465
Human Diseases	Infectious diseases	Leishmaniasis	4	66	0.732897	0.931916	1	ko05140	ncbi_100134857(NCF1);ncbi_397590(PTGS2);ncbi_100156182(TAB2);ncbi_397084(TGFB2)	K08011+K11987+K04404+K13376	Com_5_neg	C00219
Metabolism	Carbohydrate metabolism	Ascorbate and aldarate metabolism	1	18	0.751146	0.946958	4	ko00053	ncbi_100152603(UGT1A6)	K00699	Com_4817_neg;Com_992_neg;Com_6759_neg;Com_9531_neg	C00167+C00137+C00259+C00072
Metabolism	Amino acid metabolism	Alanine, aspartate and glutamate metabolism	2	36	0.759127	0.947883	5	ko00250	ncbi_100518539(GFPT2);ncbi_100522878(RIMKLA)	K00820+K18311	Com_38082_pos;Com_489_neg;Com_308_neg;Com_2837_neg;Com_5238_neg	C03406+C00158+C00025+C00049+C00122
Human Diseases	Neurodegenerative diseases	Huntington disease	12	190	0.762566	0.947883	1	ko05016	ncbi_654405(GNAQ);ncbi_100156288(NDUFA4L2);ncbi_397495(BDNF);ncbi_397651(VDAC3);ncbi_100520312(NDUFA3);ncbi_100516581(PLCB4);ncbi_100736562(CREB1);ncbi_100152679(PLCB1);ncbi_110257420(LOC110257420);ncbi_808504(COX2);ncbi_808505(ATP8);ncbi_808506(ATP6)	K04634+K03948+K04355+K15041+K03947+K05858+K05870+K05858+K02263+K02261+K02125+K02126	Com_308_neg	C00025
Metabolism	Amino acid metabolism	Arginine biosynthesis	1	19	0.769675	0.950018	7	ko00220	ncbi_397115(ARG1)	K01476	Com_13748_pos;Com_14326_pos;Com_38082_pos;Com_308_neg;Com_2837_neg;Com_3253_neg;Com_5238_neg	C00437+C00624+C03406+C00025+C00049+C00062+C00122
Organismal Systems	Digestive system	Protein digestion and absorption	5	86	0.775823	0.953616	11	ko04974	ncbi_100522330(SLC7A8);ncbi_100523618(COL21A1);ncbi_100156689(COL12A1);ncbi_100620394(COL15A1);ncbi_397323(COL2A1)	K13781+K16629+K08132+K08135+K19719	Com_4291_pos;Com_17_pos;Com_225_pos;Com_14161_pos;Com_10028_pos;Com_754_neg;Com_308_neg;Com_71_neg;Com_2837_neg;Com_3253_neg;Com_5515_neg	C00188+C00079+C00073+C00146+C00047+C00135+C00025+C00082+C00049+C00062+C00078
Metabolism	Amino acid metabolism	Glycine, serine and threonine metabolism	2	40	0.808714	0.971412	6	ko00260	ncbi_397129(DLD);ncbi_110256074(SRR)	K00382+K12235	Com_4291_pos;Com_233_pos;Com_196_pos;Com_2837_neg;Com_5515_neg;Com_6126_neg	C00188+C00114+C00300+C00049+C00078+C01005
Metabolism	Carbohydrate metabolism	Pentose and glucuronate interconversions	1	22	0.8174	0.971412	5	ko00040	ncbi_100152603(UGT1A6)	K00699	Com_4817_neg;Com_711_neg;Com_6759_neg;Com_5747_neg;Com_13620_neg	C00167+C00199+C00259+C00111+C00379
Metabolism	Lipid metabolism	Glycerolipid metabolism	3	59	0.824763	0.971412	1	ko00561	ncbi_100233193(MGLL);ncbi_100155736(LIPG);ncbi_100157742(DGKH)	K01054+K22284+K00901	Com_5747_neg	C00111
Metabolism	Global and overview maps	Carbon metabolism	6	110	0.836281	0.971412	12	ko01200	ncbi_692156(ENO3);ncbi_494561(HK2);ncbi_100152344(HK1);ncbi_397129(DLD);ncbi_100152303(ACAT2);ncbi_100157750(ENO2)	K01689+K00844+K00844+K00382+K00626+K01689	Com_489_neg;Com_711_neg;Com_2688_neg;Com_308_neg;Com_6714_neg;Com_5747_neg;Com_2837_neg;Com_2068_neg;Com_6126_neg;Com_17664_neg;Com_1305_neg;Com_5238_neg	C00158+C00199+C05382+C00025+C01182+C00111+C00049+C00074+C01005+C00440+C00149+C00122
Metabolism	Carbohydrate metabolism	Butanoate metabolism	1	24	0.843595	0.971412	2	ko00650	ncbi_100152303(ACAT2)	K00626	Com_308_neg;Com_5238_neg	C00025+C00122
Metabolism	Metabolism of cofactors and vitamins	Folate biosynthesis	1	24	0.843595	0.971412	2	ko00790	ncbi_733634(AKR1C1)	K04119	Com_7427_neg;Com_6974_neg	C00504+C00415
Genetic Information Processing	Translation	Aminoacyl-tRNA biosynthesis	2	44	0.849002	0.971412	11	ko00970	ncbi_100622027(SEPSECS);ncbi_100624597(YARS2)	K03341+K01866	Com_4291_pos;Com_17_pos;Com_225_pos;Com_10028_pos;Com_754_neg;Com_308_neg;Com_71_neg;Com_2837_neg;Com_3253_neg;Com_5515_neg;Com_6126_neg	C00188+C00079+C00073+C00047+C00135+C00025+C00082+C00049+C00062+C00078+C01005
Human Diseases	Infectious diseases	Salmonella infection	4	80	0.855264	0.971412	1	ko05132	ncbi_100154566(DYNC1I2);ncbi_396610(MAPK8);ncbi_397447(ROCK1);ncbi_397445(ROCK2)	K10415+K04440+K04514+K17388	Com_3253_neg	C00062
Metabolism	Lipid metabolism	Ether lipid metabolism	2	45	0.857791	0.971412	1	ko00565	ncbi_100520687(PLA2G4A);ncbi_100152050(ENPP6)	K16342+K08743	Com_634_pos	C00670
Organismal Systems	Sensory system	Phototransduction	1	27	0.876024	0.971542	1	ko04744	ncbi_100516153(RCVRN)	K13764	Com_6944_pos	C00144
Human Diseases	Neurodegenerative diseases	Amyotrophic lateral sclerosis (ALS)	2	48	0.881423	0.971542	2	ko05014	ncbi_397536(BCL2L1);ncbi_100627068(SLC1A2)	K04570+K05613	Com_308_neg;Com_3253_neg	C00025+C00062
Metabolism	Lipid metabolism	Linoleic acid metabolism	1	28	0.885266	0.971542	3	ko00591	ncbi_100520687(PLA2G4A)	K16342	Com_18468_neg;Com_5_neg;Com_19_neg	C14766+C00219+C03242
Organismal Systems	Digestive system	Bile secretion	3	68	0.890077	0.971542	31	ko04976	ncbi_100514402(ADCY3);ncbi_100622999(ADCY8);ncbi_102164419(SLC2A1)	K08043+K08048+K07299	Com_233_pos;Com_6717_pos;Com_1160_pos;Com_136_pos;Com_16856_pos;Com_22_pos;Com_2773_pos;Com_40620_pos;Com_8965_pos;Com_9777_pos;Com_92_pos;Com_5_pos;Com_28093_pos;Com_8549_pos;Com_20746_pos;Com_18580_pos;Com_31514_pos;Com_7196_pos;Com_1406_pos;Com_657_neg;Com_3197_neg;Com_734_neg;Com_14443_neg;Com_18786_neg;Com_2700_neg;Com_2258_neg;Com_20674_neg;Com_4463_neg;Com_18982_neg;Com_3874_neg;Com_7427_n…	C00114+C01996+C00318+C00750+C05122+C03758+C06999+C00187+C07184+C09955+C00315+C05551+C00051+C00735+C00735+C07966+C06526+C02166+C03990+C06804+C00366+C00805+C00486+C00575+C03642+C02165+C05466+C01921+C04483+C05465+C00504
Metabolism	Carbohydrate metabolism	Citrate cycle (TCA cycle)	1	29	0.893821	0.971542	5	ko00020	ncbi_397129(DLD)	K00382	Com_489_neg;Com_2068_neg;Com_11743_neg;Com_1305_neg;Com_5238_neg	C00158+C00074+C00417+C00149+C00122
Metabolism	Global and overview maps	Biosynthesis of amino acids	3	69	0.895795	0.971542	26	ko01230	ncbi_692156(ENO3);ncbi_397115(ARG1);ncbi_100157750(ENO2)	K01689+K01476+K01689	Com_4291_pos;Com_17_pos;Com_225_pos;Com_13748_pos;Com_14326_pos;Com_1934_pos;Com_2463_pos;Com_38082_pos;Com_37822_pos;Com_33595_pos;Com_10028_pos;Com_489_neg;Com_711_neg;Com_2688_neg;Com_754_neg;Com_308_neg;Com_71_neg;Com_11095_neg;Com_5747_neg;Com_4434_neg;Com_2837_neg;Com_3253_neg;Com_2068_neg;Com_5515_neg;Com_6126_neg;Com_3341_neg	C00188+C00079+C00073+C00437+C00624+C00141+C02504+C03406+C00019+C00666+C00047+C00158+C00199+C05382+C00135+C00025+C00082+C00449+C00111+C01179+C00049+C00062+C00074+C00078+C01005+C00166
Metabolism	Metabolism of other amino acids	beta-Alanine metabolism	1	31	0.909067	0.975009	7	ko00410	ncbi_100153052(SMS)	K00802	Com_136_pos;Com_156_pos;Com_92_pos;Com_754_neg;Com_2837_neg;Com_1838_neg;Com_3976_neg	C00750+C00864+C00315+C00135+C00049+C00106+C00386
Human Diseases	Infectious diseases	Pertussis	3	73	0.916082	0.975009	1	ko05133	ncbi_497233(CFL2);ncbi_396900(AMCF-II);ncbi_396610(MAPK8)	K05765+K05506+K04440	Com_18786_neg	C00575
Environmental Information Processing	Signaling molecules and interaction	Neuroactive ligand-receptor interaction	15	273	0.917891	0.975009	15	ko04080	ncbi_606743(ADORA1);ncbi_641353(ADRA2B);ncbi_397004(SSTR1);ncbi_100512849(P2RY6);ncbi_397432(HTR2A);ncbi_100151989(CHRNA3);ncbi_497623(P2RX7);ncbi_396776(THRB);ncbi_100519355(F2RL2);ncbi_100516491(CHRNB2);ncbi_100623476(HTR6);ncbi_733706(ADRA2C);ncbi_100622617(GABRA2);ncbi_106507947(UTS2R);ncbi_100511175(GABBR2)	K04265+K04139+K04217+K04272+K04157+K04805+K05220+K08362+K04235+K04813+K04162+K04140+K05175+K04241+K04615	Com_6717_pos;Com_190_pos;Com_22_pos;Com_12527_pos;Com_10082_pos;Com_8549_pos;Com_20746_pos;Com_13965_pos;Com_7312_pos;Com_7196_pos;Com_13476_pos;Com_308_neg;Com_2837_neg;Com_2258_neg;Com_4508_neg	C01996+C00212+C03758+C01598+C00788+C00735+C00735+C01312+C05951+C02166+C05952+C00025+C00049+C02165+C00696
Human Diseases	Neurodegenerative diseases	Prion diseases	1	33	0.922127	0.975009	2	ko05020	ncbi_100520726(EGR1)	K09203	Com_18786_neg;Com_7286_neg	C00575+C02140
Metabolism	Lipid metabolism	Glycerophospholipid metabolism	4	95	0.930035	0.97634	4	ko00564	ncbi_100520687(PLA2G4A);ncbi_100621099(ACHE);ncbi_100519388(ADPRM);ncbi_100157742(DGKH)	K16342+K01049+K01517+K00901	Com_233_pos;Com_6717_pos;Com_634_pos;Com_5747_neg	C00114+C01996+C00670+C00111
Metabolism	Amino acid metabolism	Tyrosine metabolism	1	35	0.933315	0.97634	11	ko00350	ncbi_100512795(LOC100512795)	K13951	Com_22_pos;Com_19473_pos;Com_10565_pos;Com_10082_pos;Com_13721_pos;Com_14161_pos;Com_2319_pos;Com_71_neg;Com_4434_neg;Com_9194_neg;Com_5238_neg	C03758+C05579+C05589+C00788+C00544+C00146+C00355+C00082+C01179+C05582+C00122
Metabolism	Amino acid metabolism	Tryptophan metabolism	1	43	0.964156	0.993944	12	ko00380	ncbi_100152303(ACAT2)	K00626	Com_3922_pos;Com_99_pos;Com_4321_pos;Com_36850_pos;Com_12527_pos;Com_1426_pos;Com_16022_pos;Com_13899_pos;Com_4186_neg;Com_5515_neg;Com_3728_neg;Com_283_neg	C01717+C00954+C02470+C05635+C01598+C00643+C02700+C05635+C00328+C00078+C05643+C00331
Organismal Systems	Endocrine system	PPAR signaling pathway	2	71	0.972583	0.993944	1	ko03320	ncbi_444997(FADS2);ncbi_396670(SCD)	K10226+K00507	Com_2258_neg	C02165
Environmental Information Processing	Membrane transport	ABC transporters	1	47	0.973728	0.993944	20	ko02010	ncbi_100514786(LOC100514786)	K05647	Com_4291_pos;Com_17_pos;Com_233_pos;Com_1937_pos;Com_617_pos;Com_1543_pos;Com_92_pos;Com_140_pos;Com_28093_pos;Com_22196_pos;Com_10028_pos;Com_754_neg;Com_308_neg;Com_992_neg;Com_6759_neg;Com_2837_neg;Com_3253_neg;Com_13620_neg;Com_98_neg;Com_999_neg	C00188+C00079+C00114+C00378+C00492+C00208+C00315+C00208+C00051+C04137+C00047+C00135+C00025+C00137+C00259+C00049+C00062+C00379+C01835+C00392
Organismal Systems	Nervous system	Synaptic vesicle cycle	1	61	0.991156	0.999776	3	ko04721	ncbi_100514772(SLC17A7)	K12302	Com_6717_pos;Com_22_pos;Com_308_neg	C01996+C03758+C00025
Organismal Systems	Sensory system	Olfactory transduction	5	888	1	1	3	ko04740	ncbi_733640(PRKG1);ncbi_100156785(NCALD);ncbi_100521141(ARRB1);ncbi_100152819(PDE1A);ncbi_100514402(ADCY3)	K07376+K19695+K04439+K13755+K08043	Com_27274_pos;Com_6944_pos;Com_18786_neg	C00020+C00144+C00575

## Sheet: TN and TL
7.2 Integrated analysis of KEGG annotation in unique DEGs (excluding DEGs between normoxia and hypoxia groups) for TN and TL groups and all DAMs
KEGG_A_class	KEGG_B_class	Pathway	Gene_TN-vs-TL (640)	Gene_All (7351)	Gene_Pvalue	Gene_Qvalue	Metabolites Count (240)	Pathway ID	Genes	K_IDs	Metabolites	C_IDs
Metabolism	Global and overview maps	Carbon metabolism	22	110	0.000162531	0.0210826	12	ko01200	ncbi_100157582(TPI1);ncbi_407608(PGK1);ncbi_396823(GAPDH);ncbi_100512013(ALDOC);ncbi_396894(MDH1);ncbi_396968(GOT2);ncbi_397568(CAT);ncbi_397602(GPI);ncbi_397538(ME1);ncbi_100158154(PKM);ncbi_100522516(GLYCTK);ncbi_100294678(PDHA1);ncbi_100154776(PGAM1);ncbi_100155425(GLDC);ncbi_100521394(PFKP);ncbi_399540(SUCLA2);ncbi_100524103(PCCA);ncbi_448846(EHHADH);ncbi_100621757(PFKL);ncbi_110260081(ALDOA)…	K01803+K00927+K00134+K01623+K00025+K14455+K03781+K01810+K00029+K00873+K11529+K00161+K01834+K00281+K00850+K01900+K01965+K07514+K00850+K01623+K00027+K01689	Com_489_neg;Com_711_neg;Com_2688_neg;Com_308_neg;Com_6714_neg;Com_5747_neg;Com_2837_neg;Com_2068_neg;Com_6126_neg;Com_17664_neg;Com_1305_neg;Com_5238_neg	C00158+C00199+C05382+C00025+C01182+C00111+C00049+C00074+C01005+C00440+C00149+C00122
Metabolism	Carbohydrate metabolism	Glycolysis / Gluconeogenesis	15	62	0.00020535	0.0210826	2	ko00010	ncbi_100157582(TPI1);ncbi_407608(PGK1);ncbi_407245(LDHA);ncbi_396823(GAPDH);ncbi_100512013(ALDOC);ncbi_397602(GPI);ncbi_399536(GALM);ncbi_100158154(PKM);ncbi_100294678(PDHA1);ncbi_100154776(PGAM1);ncbi_100526075(ALDH3A1);ncbi_100521394(PFKP);ncbi_100621757(PFKL);ncbi_110260081(ALDOA);ncbi_100738870(ENO1)	K01803+K00927+K00016+K00134+K01623+K01810+K01785+K00873+K00161+K01834+K00129+K00850+K00850+K01623+K01689	Com_5747_neg;Com_2068_neg	C00111+C00074
Organismal Systems	Endocrine system	Oxytocin signaling pathway	26	148	0.00038739	0.029829	3	ko04921	ncbi_444999(GUCY1B3);ncbi_553100(GUCY1A3);ncbi_100134969(NFATC2);ncbi_100157793(PRKAB2);ncbi_100511702(CD38);ncbi_100511902(RCAN1);ncbi_396913(JUN);ncbi_397092(OXTR);ncbi_397394(CAMK2G);ncbi_397448(KCNJ5);ncbi_396848(MYLK);ncbi_100626014(CAMK2A);ncbi_100519605(CACNG7);ncbi_100511102(CACNA1D);ncbi_100625149(LOC100625149);ncbi_397184(PRKCA);ncbi_100034246(PIK3R6);ncbi_110256150(KCNJ12);ncbi_397454(…	K12319+K12318+K17332+K07199+K01242+K17901+K04448+K04229+K04515+K04999+K00907+K04515+K04872+K04851+K12319+K02677+K21290+K05005+K04958+K08045+K04977+K08041+K04503+K04864+K04345+K04873	Com_5511_neg;Com_18786_neg;Com_5_neg	C13050+C00575+C00219
Metabolism	Nucleotide metabolism	Purine metabolism	28	171	0.000761168	0.0468879	18	ko00230	ncbi_444999(GUCY1B3);ncbi_553100(GUCY1A3);ncbi_396555(PDE3A);ncbi_100158154(PKM);ncbi_100157138(PNP);ncbi_100517354(DCK);ncbi_100154626(ADK);ncbi_100037967(PDE4D);ncbi_100521651(POLE2);ncbi_100522503(PPAT);ncbi_100737701(PDE2A);ncbi_100516797(LOC100516797);ncbi_100154506(ENTPD5);ncbi_100620914(AMPD3);ncbi_100522306(PDE8B);ncbi_100523457(LOC100523457);ncbi_100625149(LOC100625149);ncbi_100620107(CA…	K12319+K12318+K19021+K00873+K03783+K00893+K00856+K13293+K02325+K00764+K18283+K01081+K01511+K01490+K18437+K12321+K12319+K12304+K08045+K08041+K02320+K13296+K18436+K10808+K01513+K00940+K18437+K01587	Com_170_pos;Com_27274_pos;Com_62_pos;Com_190_pos;Com_153_pos;Com_5664_pos;Com_13518_pos;Com_6464_pos;Com_6944_pos;Com_10338_neg;Com_3197_neg;Com_559_neg;Com_79_neg;Com_18786_neg;Com_20606_neg;Com_850_neg;Com_8887_neg;Com_8323_neg	C00294+C00020+C00262+C00212+C00147+C00385+C05512+C00559+C00144+C05512+C00366+C00242+C00387+C00575+C00301+C00385+C01762+C04677
Metabolism	Global and overview maps	Biosynthesis of amino acids	14	69	0.00212298	0.0817348	26	ko01230	ncbi_100157582(TPI1);ncbi_100048960(NAGS);ncbi_407608(PGK1);ncbi_396823(GAPDH);ncbi_100156922(MAT1A);ncbi_100512013(ALDOC);ncbi_396968(GOT2);ncbi_100158154(PKM);ncbi_100154776(PGAM1);ncbi_100521394(PFKP);ncbi_100621757(PFKL);ncbi_110260081(ALDOA);ncbi_100516800(PYCR3);ncbi_100738870(ENO1)	K01803+K11067+K00927+K00134+K00789+K01623+K14455+K00873+K01834+K00850+K00850+K01623+K00286+K01689	Com_4291_pos;Com_17_pos;Com_225_pos;Com_13748_pos;Com_14326_pos;Com_1934_pos;Com_2463_pos;Com_38082_pos;Com_37822_pos;Com_33595_pos;Com_10028_pos;Com_489_neg;Com_711_neg;Com_2688_neg;Com_754_neg;Com_308_neg;Com_71_neg;Com_11095_neg;Com_5747_neg;Com_4434_neg;Com_2837_neg;Com_3253_neg;Com_2068_neg;Com_5515_neg;Com_6126_neg;Com_3341_neg	C00188+C00079+C00073+C00437+C00624+C00141+C02504+C03406+C00019+C00666+C00047+C00158+C00199+C05382+C00135+C00025+C00082+C00449+C00111+C01179+C00049+C00062+C00074+C00078+C01005+C00166
Organismal Systems	Endocrine system	Renin secretion	13	65	0.00345051	0.093791	4	ko04924	ncbi_444999(GUCY1B3);ncbi_553100(GUCY1A3);ncbi_396555(PDE3A);ncbi_397457(EDNRA);ncbi_407773(AQP1);ncbi_100511102(CACNA1D);ncbi_100127164(PTGER2);ncbi_100625149(LOC100625149);ncbi_397454(ITPR1);ncbi_100155970(ADCY5);ncbi_100625072(PTGER4);ncbi_100516060(PDE3B);ncbi_100623628(PRKACB)	K12319+K12318+K19021+K04197+K09864+K04851+K04259+K12319+K04958+K08045+K04261+K13296+K04345	Com_27274_pos;Com_190_pos;Com_10082_pos;Com_18786_neg	C00020+C00212+C00788+C00575
Environmental Information Processing	Signal transduction	PI3K-Akt signaling pathway	44	337	0.00388644	0.093791	1	ko04151	ncbi_396762(FGFR2);ncbi_100125959(MDM2);ncbi_100144501(EFNA1);ncbi_100144493(NTF3);ncbi_100153821(DDIT4);ncbi_100627508(EIF4EBP1);ncbi_100512686(IRS1);ncbi_399543(VWF);ncbi_397089(PPP2R2B);ncbi_397253(IL7);ncbi_397460(TNC);ncbi_397554(EPOR);ncbi_397668(AREG);ncbi_100157949(GNB5);ncbi_100155091(ITGA5);ncbi_100156404(PGF);ncbi_397620(FN1);ncbi_397470(PPP2R1B);ncbi_100049662(BRCA1);ncbi_100738399(LP…	K05093+K06643+K05462+K04356+K08270+K07205+K16172+K03900+K04354+K05431+K06252+K05079+K09782+K04539+K06484+K16859+K05717+K03456+K10605+K04273+K05629+K05069+K05450+K06252+K06246+K06244+K06584+K02677+K21290+K07206+K06238+K06480+K08131+K04503+K02649+K05097+K05462+K02582+K06583+K05084+K16340+K05637+K02161+K18497	Com_27274_pos	C00020
Environmental Information Processing	Signal transduction	Calcium signaling pathway	27	183	0.00437785	0.093791	2	ko04020	ncbi_414911(EDNRB);ncbi_100144471(ADRA1A);ncbi_100144487(DRD1);ncbi_100511702(CD38);ncbi_397092(OXTR);ncbi_397126(PTGFR);ncbi_397394(CAMK2G);ncbi_397457(EDNRA);ncbi_397659(VDAC2);ncbi_396848(MYLK);ncbi_100626014(CAMK2A);ncbi_100511102(CACNA1D);ncbi_100523996(HRH1);ncbi_100519563(P2RX5);ncbi_100625881(PHKB);ncbi_606745(ADORA2B);ncbi_397184(PRKCA);ncbi_503667(CAMKK1);ncbi_396820(ATP2A3);ncbi_397454…	K04198+K04135+K04144+K01242+K04229+K04262+K04515+K04197+K15040+K00907+K04515+K04851+K04149+K05219+K07190+K04267+K02677+K05215+K05853+K04958+K04211+K08041+K04855+K05849+K05084+K04345+K00911	Com_5511_neg;Com_18786_neg	C13050+C00575
Metabolism	Global and overview maps	Metabolic pathways	134	1254	0.0043984	0.093791	158	ko01100	ncbi_445539(HSD3B1);ncbi_100157582(TPI1);ncbi_448980(ACSL4);ncbi_100048960(NAGS);ncbi_407608(PGK1);ncbi_100142661(ASPA);ncbi_100142669(BCKDHB);ncbi_100126281(CYP3A46);ncbi_100170771(LPIN3);ncbi_100233169(ACSL3);ncbi_100233200(PLPP2);ncbi_100049690(PNPLA3);ncbi_641344(GNE);ncbi_100312969(ELOVL1);ncbi_407245(LDHA);ncbi_100154219(LTA4H);ncbi_100155883(NANS);ncbi_100157621(UQCRB);ncbi_100153961(HOGA1…	K00070+K01803+K01897+K11067+K00927+K01437+K00167+K07424+K15728+K01897+K01080+K13534+K12409+K10247+K00016+K01254+K05304+K00417+K18123+K00134+K00789+K15376+K00933+K01242+K01623+K21418+K14157+K01641+K01809+K05604+K00157+K00025+K13247+K01230+K00255+K02129+K14455+K00868+K01810+K14592+K01785+K05917+K00029+K02366+K11205+K01793+K00873+K03783+K00816+K10703+K00252+K00807+K00779+K00741+K07232+K18310+K07553+…	Com_4291_pos;Com_33974_pos;Com_170_pos;Com_1009_pos;Com_2489_pos;Com_17_pos;Com_25418_pos;Com_233_pos;Com_226_pos;Com_2801_pos;Com_136_pos;Com_196_pos;Com_225_pos;Com_169_pos;Com_3922_pos;Com_27274_pos;Com_156_pos;Com_62_pos;Com_99_pos;Com_1937_pos;Com_13748_pos;Com_190_pos;Com_1002_pos;Com_153_pos;Com_16856_pos;Com_22_pos;Com_5664_pos;Com_40620_pos;Com_19473_pos;Com_14326_pos;Com_6710_pos;Com_15…	C00188+C00280+C00294+C00791+C00475+C00079+C00535+C00114+C00153+C00380+C00750+C00300+C00073+C00314+C01717+C00020+C00864+C00262+C00954+C00378+C00437+C00212+C00170+C00147+C05122+C03758+C00385+C00187+C05579+C00624+C07215+C00208+C00315+C02046+C01157+C00141+C05957+C00208+C02504+C16356+C00329+C00951+C05954+C05512+C03406+C05589+C05635+C01598+C04294+C00468+C00993+C00606+C00003+C00051+C01953+C00559+C02480+…
Human Diseases	Cardiovascular diseases	Dilated cardiomyopathy (DCM)	15	83	0.00483797	0.093791	1	ko05414	ncbi_100037999(TPM1);ncbi_100135674(SGCB);ncbi_100240724(SGCD);ncbi_100155091(ITGA5);ncbi_100519605(CACNG7);ncbi_100511102(CACNA1D);ncbi_100512676(ITGA8);ncbi_100155970(ADCY5);ncbi_100519519(TTN);ncbi_100512142(ITGA1);ncbi_100624934(ADCY1);ncbi_110260578(ITGA7);ncbi_100524021(CACNB3);ncbi_100623628(PRKACB);MSTRG.23103(CACNG8)	K10373+K12566+K12563+K06484+K04872+K04851+K06584+K08045+K12567+K06480+K08041+K06583+K04864+K04345+K04873	Com_18786_neg	C00575
Environmental Information Processing	Signal transduction	cGMP - PKG signaling pathway	24	162	0.00664072	0.11363	4	ko04022	ncbi_444999(GUCY1B3);ncbi_553100(GUCY1A3);ncbi_414911(EDNRB);ncbi_100037273(MEF2A);ncbi_100134969(NFATC2);ncbi_100144471(ADRA1A);ncbi_100512686(IRS1);ncbi_396555(PDE3A);ncbi_397457(EDNRA);ncbi_397659(VDAC2);ncbi_396848(MYLK);ncbi_100511102(CACNA1D);ncbi_100739522(MRVI1);ncbi_100737701(PDE2A);ncbi_100513345(GTF2I);ncbi_100625149(LOC100625149);ncbi_396820(ATP2A3);ncbi_100034246(PIK3R6);ncbi_397454(…	K12319+K12318+K04198+K09260+K17332+K04135+K16172+K19021+K04197+K15040+K00907+K04851+K12337+K18283+K03121+K12319+K05853+K21290+K04958+K08045+K08041+K13296+K05849+K04941	Com_27274_pos;Com_190_pos;Com_6944_pos;Com_18786_neg	C00020+C00212+C00144+C00575
Organismal Systems	Sensory system	Inflammatory mediator regulation of TRP channels	16	97	0.00909283	0.14003	4	ko04750	ncbi_450248(P2RY2);ncbi_397394(CAMK2G);ncbi_100626014(CAMK2A);ncbi_100524940(LOC100524940);ncbi_100521736(MAPK10);ncbi_100127164(PTGER2);ncbi_100523996(HRH1);ncbi_100628318(IL1RAP);ncbi_397184(PRKCA);ncbi_397454(ITPR1);ncbi_100155970(ADCY5);ncbi_100625072(PTGER4);ncbi_100624934(ADCY1);ncbi_100739510(PIK3R2);ncbi_100738968(NGF);ncbi_100623628(PRKACB)	K04269+K04515+K04515+K07418+K04440+K04259+K04149+K04723+K02677+K04958+K08045+K04261+K08041+K02649+K02582+K04345	Com_18786_neg;Com_2275_neg;Com_2258_neg;Com_5_neg	C00575+C05965+C02165+C00219
Human Diseases	Substance dependence	Morphine addiction	15	90	0.0103317	0.140422	4	ko05032	ncbi_100144487(DRD1);ncbi_396555(PDE3A);ncbi_397448(KCNJ5);ncbi_100157949(GNB5);ncbi_100525792(GABRP);ncbi_100037967(PDE4D);ncbi_100737701(PDE2A);ncbi_100522306(PDE8B);ncbi_397184(PRKCA);ncbi_100155970(ADCY5);ncbi_100624934(ADCY1);ncbi_100516060(PDE3B);ncbi_100037969(PDE7B);ncbi_100623628(PRKACB);ncbi_100514527(PDE8A)	K04144+K19021+K04999+K04539+K05189+K13293+K18283+K18437+K02677+K08045+K08041+K13296+K18436+K04345+K18437	Com_27274_pos;Com_190_pos;Com_22_pos;Com_18786_neg	C00020+C00212+C03758+C00575
Metabolism	Metabolism of cofactors and vitamins	Nicotinate and nicotinamide metabolism	7	29	0.0104861	0.140422	8	ko00760	ncbi_100511702(CD38);ncbi_100523701(AOX1);ncbi_100157138(PNP);ncbi_100516797(LOC100516797);ncbi_100037271(ENPP1);ncbi_403161(NAPRT);ncbi_110261345(NADK)	K01242+K00157+K03783+K01081+K01513+K00763+K00858	Com_226_pos;Com_24643_pos;Com_22983_pos;Com_826_pos;Com_5747_neg;Com_2837_neg;Com_4049_neg;Com_5238_neg	C00153+C00003+C00455+C00455+C00111+C00049+C00003+C00122
Metabolism	Lipid metabolism	Biosynthesis of unsaturated fatty acids	6	24	0.014682	0.18455	11	ko01040	ncbi_100523711(HACD4);ncbi_100523084(HACD1);ncbi_102158186(HACD2);ncbi_100312972(HSD17B12);ncbi_100171403(ELOVL5);ncbi_100312970(ELOVL6)	K10703+K10703+K10703+K10251+K10244+K10203	Com_869_pos;Com_77_pos;Com_353_neg;Com_11_neg;Com_8_neg;Com_46_neg;Com_588_neg;Com_810_neg;Com_331_neg;Com_5_neg;Com_19_neg	C06428+C16513+C08323+C16527+C06429+C06428+C16533+C08281+C08316+C00219+C03242
Metabolism	Metabolism of cofactors and vitamins	Vitamin B6 metabolism	3	7	0.0176096	0.20088	4	ko00750	ncbi_100523701(AOX1);ncbi_396983(PDXK);ncbi_100623846(PDXP)	K00157+K00868+K07758	Com_169_pos;Com_13599_pos;Com_711_neg;Com_5796_neg	C00314+C00534+C00199+C00847
Human Diseases	Cancers	Pathways in cancer	57	503	0.0214118	0.23553	10	ko05200	ncbi_414912(SPI1);ncbi_494460(CXCL12);ncbi_414911(EDNRB);ncbi_396762(FGFR2);ncbi_100125959(MDM2);ncbi_100135659(NCOA3);ncbi_396696(HIF1A);ncbi_100170126(LEF1);ncbi_397320(MMP1);ncbi_100329128(SKP2);ncbi_100337661(MSH2);ncbi_100152404(HEY2);ncbi_396913(JUN);ncbi_397244(CASP3);ncbi_397253(IL7);ncbi_397394(CAMK2G);ncbi_397457(EDNRA);ncbi_397554(EPOR);ncbi_397567(MGST1);ncbi_397582(AR);ncbi_100157949…	K09438+K10031+K04198+K05093+K06643+K11256+K08268+K04492+K01388+K03875+K08735+K09091+K04448+K02187+K05431+K04515+K04197+K05079+K00799+K08557+K04539+K06067+K16859+K15589+K04498+K04515+K04440+K00572+K05717+K00182+K04259+K09850+K09849+K04273+K02842+K05069+K06246+K06244+K08803+K08775+K04385+K02677+K08045+K05126+K04261+K08041+K06230+K04503+K02649+K05097+K02620+K00444+K05637+K04345+K11101+K02161+K18497	Com_33974_pos;Com_25418_pos;Com_40620_pos;Com_5124_pos;Com_8549_pos;Com_20746_pos;Com_1105_pos;Com_18786_neg;Com_1305_neg;Com_5238_neg	C00280+C00535+C00187+C00951+C00735+C00735+C00762+C00575+C00149+C00122
Organismal Systems	Endocrine system	Melanogenesis	15	99	0.0235296	0.2499	2	ko04916	ncbi_414911(EDNRB);ncbi_100170126(LEF1);ncbi_396863(POMC);ncbi_397394(CAMK2G);ncbi_100156226(EP300);ncbi_100626014(CAMK2A);ncbi_100153445(WNT7A);ncbi_100516839(WNT2);ncbi_100625784(FZD9);ncbi_397184(PRKCA);ncbi_100155970(ADCY5);ncbi_100624934(ADCY1);ncbi_100512951(TCF7);ncbi_100516268(WNT5B);ncbi_100623628(PRKACB)	K04198+K04492+K05228+K04515+K04498+K04515+K00572+K00182+K02842+K02677+K08045+K08041+K02620+K00444+K04345	Com_71_neg;Com_18786_neg	C00082+C00575
Organismal Systems	Endocrine system	Aldosterone synthesis and secretion	14	92	0.0271466	0.276824	8	ko04925	ncbi_445539(HSD3B1);ncbi_100157120(NR4A2);ncbi_396863(POMC);ncbi_397394(CAMK2G);ncbi_397448(KCNJ5);ncbi_100626014(CAMK2A);ncbi_100511102(CACNA1D);ncbi_100737701(PDE2A);ncbi_397184(PRKCA);ncbi_397454(ITPR1);ncbi_100155970(ADCY5);ncbi_100624934(ADCY1);ncbi_110259950(CACNA1H);ncbi_100623628(PRKACB)	K00070+K08558+K05228+K04515+K04999+K04515+K04851+K18283+K02677+K04958+K08045+K08041+K04855+K04345	Com_27274_pos;Com_40620_pos;Com_24643_pos;Com_36804_pos;Com_18786_neg;Com_7286_neg;Com_4049_neg;Com_5_neg	C00020+C00187+C00003+C01953+C00575+C02140+C00003+C00219
Human Diseases	Cancers	Central carbon metabolism in cancer	10	59	0.0296415	0.276824	12	ko05230	ncbi_396762(FGFR2);ncbi_396696(HIF1A);ncbi_100158154(PKM);ncbi_100294678(PDHA1);ncbi_100154776(PGAM1);ncbi_100158243(SLC16A3);ncbi_100521394(PFKP);ncbi_100621757(PFKL);ncbi_100155053(RET);ncbi_100739510(PIK3R2)	K05093+K08268+K00873+K00161+K01834+K08180+K00850+K00850+K05126+K02649	Com_17_pos;Com_225_pos;Com_489_neg;Com_754_neg;Com_308_neg;Com_71_neg;Com_2837_neg;Com_3253_neg;Com_2068_neg;Com_5515_neg;Com_1305_neg;Com_5238_neg	C00079+C00073+C00158+C00135+C00025+C00082+C00049+C00062+C00074+C00078+C00149+C00122
Metabolism	Carbohydrate metabolism	Pentose phosphate pathway	6	28	0.0305585	0.276824	2	ko00030	ncbi_100512013(ALDOC);ncbi_397602(GPI);ncbi_100522516(GLYCTK);ncbi_100521394(PFKP);ncbi_100621757(PFKL);ncbi_110260081(ALDOA)	K01623+K01810+K11529+K00850+K00850+K01623	Com_711_neg;Com_2688_neg	C00199+C05382
Organismal Systems	Environmental adaptation	Circadian entrainment	14	94	0.0320122	0.281707	3	ko04713	ncbi_444999(GUCY1B3);ncbi_553100(GUCY1A3);ncbi_397394(CAMK2G);ncbi_397448(KCNJ5);ncbi_100157949(GNB5);ncbi_100626014(CAMK2A);ncbi_100511102(CACNA1D);ncbi_100625149(LOC100625149);ncbi_397184(PRKCA);ncbi_397454(ITPR1);ncbi_100155970(ADCY5);ncbi_100624934(ADCY1);ncbi_110259950(CACNA1H);ncbi_100623628(PRKACB)	K12319+K12318+K04515+K04999+K04539+K04515+K04851+K12319+K02677+K04958+K08045+K08041+K04855+K04345	Com_12527_pos;Com_308_neg;Com_18786_neg	C01598+C00025+C00575
Organismal Systems	Endocrine system	Glucagon signaling pathway	14	95	0.0346697	0.296619	5	ko04922	ncbi_399527(CPT1A);ncbi_407245(LDHA);ncbi_100157793(PRKAB2);ncbi_397394(CAMK2G);ncbi_100158154(PKM);ncbi_100156226(EP300);ncbi_100626014(CAMK2A);ncbi_100294678(PDHA1);ncbi_100154776(PGAM1);ncbi_100625881(PHKB);ncbi_397454(ITPR1);ncbi_100621265(SIK1);ncbi_100516060(PDE3B);ncbi_100623628(PRKACB)	K08765+K00016+K07199+K04515+K00873+K04498+K04515+K00161+K01834+K07190+K04958+K19008+K13296+K04345	Com_489_neg;Com_18786_neg;Com_2068_neg;Com_1305_neg;Com_5238_neg	C00158+C00575+C00074+C00149+C00122
Organismal Systems	Digestive system	Vitamin digestion and absorption	5	22	0.0373236	0.303809	11	ko04977	ncbi_397677(FOLH1B);ncbi_397681(APOA4);ncbi_397691(APOA1);ncbi_100521743(CUBN);ncbi_733619(ABCC1)	K14592+K08760+K08757+K14616+K05665	Com_226_pos;Com_156_pos;Com_1937_pos;Com_40620_pos;Com_24643_pos;Com_13599_pos;Com_2951_neg;Com_9531_neg;Com_4049_neg;Com_7240_neg;Com_7427_neg	C00153+C00864+C00378+C00187+C00003+C00534+C00255+C00072+C00003+C00016+C00504
Human Diseases	Cancers	Choline metabolism in cancer	14	96	0.0374829	0.303809	2	ko05231	ncbi_396696(HIF1A);ncbi_100233200(PLPP2);ncbi_100627508(EIF4EBP1);ncbi_396913(JUN);ncbi_100524730(SLC44A2);ncbi_100512419(PLPP3);ncbi_100521736(MAPK10);ncbi_100513866(SLC44A5);ncbi_100524161(PDGFD);ncbi_100155782(WASF3);ncbi_397184(PRKCA);ncbi_100154726(TSC1);ncbi_100521167(DGKI);ncbi_100739510(PIK3R2)	K08268+K01080+K07205+K04448+K15377+K01080+K04440+K15377+K05450+K06083+K02677+K07206+K00901+K02649	Com_233_pos;Com_634_pos	C00114+C00670
Metabolism	Carbohydrate metabolism	Glyoxylate and dicarboxylate metabolism	6	30	0.0415741	0.314671	5	ko00630	ncbi_100153961(HOGA1);ncbi_396894(MDH1);ncbi_397568(CAT);ncbi_100522516(GLYCTK);ncbi_100155425(GLDC);ncbi_100524103(PCCA)	K18123+K00025+K03781+K11529+K00281+K01965	Com_489_neg;Com_308_neg;Com_6714_neg;Com_11743_neg;Com_1305_neg	C00158+C00025+C01182+C00417+C00149
Organismal Systems	Endocrine system	PPAR signaling pathway	11	71	0.041888	0.314671	1	ko03320	ncbi_397628(ANGPTL4);ncbi_448980(ACSL4);ncbi_733702(CD36);ncbi_399527(CPT1A);ncbi_100233169(ACSL3);ncbi_397320(MMP1);ncbi_396931(ACADL);ncbi_397537(LPL);ncbi_397691(APOA1);ncbi_100153151(SORBS1);ncbi_448846(EHHADH)	K08767+K01897+K06259+K08765+K01897+K01388+K00255+K01059+K08757+K06086+K07514	Com_2258_neg	C02165
Organismal Systems	Circulatory system	Vascular smooth muscle contraction	16	116	0.0430293	0.315548	4	ko04270	ncbi_444999(GUCY1B3);ncbi_553100(GUCY1A3);ncbi_100144471(ADRA1A);ncbi_397457(EDNRA);ncbi_396848(MYLK);ncbi_100511102(CACNA1D);ncbi_100622305(PTGIR);ncbi_100739522(MRVI1);ncbi_100625149(LOC100625149);ncbi_606745(ADORA2B);ncbi_397184(PRKCA);ncbi_397454(ITPR1);ncbi_100155970(ADCY5);ncbi_100624934(ADCY1);ncbi_100154587(KCNMB4);ncbi_100623628(PRKACB)	K12319+K12318+K04135+K04197+K00907+K04851+K04263+K12337+K12319+K04267+K02677+K04958+K08045+K08041+K04941+K04345	Com_190_pos;Com_13965_pos;Com_18786_neg;Com_5_neg	C00212+C01312+C00575+C00219
Metabolism	Amino acid metabolism	Histidine metabolism	5	23	0.044396	0.317999	8	ko00340	ncbi_100142661(ASPA);ncbi_100624677(HNMT);ncbi_100516053(CNDP1);ncbi_100518712(CARNMT1);ncbi_100526075(ALDH3A1)	K01437+K00546+K05604+K19787+K00129	Com_20635_pos;Com_11699_pos;Com_30923_pos;Com_754_neg;Com_308_neg;Com_2837_neg;Com_8323_neg;Com_3976_neg	C01152+C05135+C01152+C00135+C00025+C00049+C04677+C00386
Environmental Information Processing	Membrane transport	ABC transporters	8	47	0.0479081	0.32078	20	ko02010	ncbi_403154(CFTR);ncbi_397073(ABCG2);ncbi_100155346(ABCB9);ncbi_100127449(ABCC9);ncbi_100155585(ABCB6);ncbi_100520216(LOC100520216);ncbi_100152536(ABCC4);ncbi_733619(ABCC1)	K05031+K05681+K05656+K05033+K05661+K05651+K05673+K05665	Com_4291_pos;Com_17_pos;Com_233_pos;Com_1937_pos;Com_617_pos;Com_1543_pos;Com_92_pos;Com_140_pos;Com_28093_pos;Com_22196_pos;Com_10028_pos;Com_754_neg;Com_308_neg;Com_992_neg;Com_6759_neg;Com_2837_neg;Com_3253_neg;Com_13620_neg;Com_98_neg;Com_999_neg	C00188+C00079+C00114+C00378+C00492+C00208+C00315+C00208+C00051+C04137+C00047+C00135+C00025+C00137+C00259+C00049+C00062+C00379+C01835+C00392
Metabolism	Carbohydrate metabolism	Propanoate metabolism	6	31	0.0479087	0.32078	2	ko00640	ncbi_100142669(BCKDHB);ncbi_407245(LDHA);ncbi_100512509(ECHDC1);ncbi_399540(SUCLA2);ncbi_100524103(PCCA);ncbi_448846(EHHADH)	K00167+K00016+K18426+K01900+K01965+K07514	Com_5747_neg;Com_2034_neg	C00111+C02170
Environmental Information Processing	Signal transduction	cAMP signaling pathway	24	195	0.0516593	0.324628	7	ko04024	ncbi_403154(CFTR);ncbi_100144487(DRD1);ncbi_396555(PDE3A);ncbi_396840(SOX9);ncbi_396913(JUN);ncbi_397092(OXTR);ncbi_397394(CAMK2G);ncbi_397457(EDNRA);ncbi_397547(NPY1R);ncbi_100156226(EP300);ncbi_100626014(CAMK2A);ncbi_100521736(MAPK10);ncbi_100511102(CACNA1D);ncbi_100127164(PTGER2);ncbi_100037967(PDE4D);ncbi_100152536(ABCC4);ncbi_100155970(ADCY5);ncbi_100624934(ADCY1);ncbi_100516888(GLI3);ncbi_1…	K05031+K04144+K19021+K18435+K04448+K04229+K04515+K04197+K04204+K04498+K04515+K04440+K04851+K04259+K13293+K05673+K08045+K08041+K06230+K13296+K02649+K04955+K05730+K04345	Com_6717_pos;Com_27274_pos;Com_190_pos;Com_22_pos;Com_10082_pos;Com_13965_pos;Com_18786_neg	C01996+C00020+C00212+C03758+C00788+C01312+C00575
Cellular Processes	Cell motility	Regulation of actin cytoskeleton	25	205	0.0522966	0.324628	1	ko04810	ncbi_494460(CXCL12);ncbi_396762(FGFR2);ncbi_100144442(F2);ncbi_396974(VCL);ncbi_100155091(ITGA5);ncbi_396848(MYLK);ncbi_100516483(CHRM4);ncbi_397459(ITGAM);ncbi_100513228(BAIAP2);ncbi_397620(FN1);ncbi_100622228(ARHGEF6);ncbi_100524161(PDGFD);ncbi_100525245(ENAH);ncbi_100512676(ITGA8);ncbi_100522756(SPATA13);ncbi_100514879(ABI2);ncbi_100523290(CYFIP2);ncbi_100512142(ITGA1);ncbi_100152316(PAK5);ncb…	K10031+K05093+K01313+K05700+K06484+K00907+K04132+K06461+K05627+K05717+K05729+K05450+K05746+K06584+K05769+K05751+K05749+K06480+K05736+K05733+K02649+K05730+K06583+K05732+K18497	Com_6717_pos	C01996
Metabolism	Amino acid metabolism	Arginine and proline metabolism	8	48	0.0533036	0.324628	12	ko00330	ncbi_100152781(SMOX);ncbi_100153961(HOGA1);ncbi_100627332(CKB);ncbi_100516053(CNDP1);ncbi_396968(GOT2);ncbi_100623801(P4HA2);ncbi_110256626(LOC110256626);ncbi_100516800(PYCR3)	K12259+K18123+K00933+K05604+K14455+K00472+K00318+K00286	Com_1009_pos;Com_136_pos;Com_196_pos;Com_92_pos;Com_17389_pos;Com_22196_pos;Com_27076_pos;Com_37822_pos;Com_1036_neg;Com_308_neg;Com_3253_neg;Com_1760_neg	C00791+C00750+C00300+C00315+C01157+C04137+C01035+C00019+C02305+C00025+C00062+C02946
Human Diseases	Infectious diseases	Amoebiasis	13	92	0.0544618	0.324628	3	ko05146	ncbi_100037951(C9);ncbi_396974(VCL);ncbi_397208(CSF2);ncbi_397244(CASP3);ncbi_397459(ITGAM);ncbi_397620(FN1);ncbi_100624264(LAMC2);ncbi_100736655(LAMB3);ncbi_397184(PRKCA);ncbi_100624934(ADCY1);ncbi_100739510(PIK3R2);ncbi_100625589(LAMA1);ncbi_100623628(PRKACB)	K04000+K05700+K05427+K02187+K06461+K05717+K06246+K06244+K02677+K08041+K02649+K05637+K04345	Com_18786_neg;Com_3253_neg;Com_5_neg	C00575+C00062+C00219
Organismal Systems	Endocrine system	Insulin secretion	12	83	0.0545364	0.324628	2	ko04911	ncbi_397045(KCNN3);ncbi_397394(CAMK2G);ncbi_100626014(CAMK2A);ncbi_100512594(STX1A);ncbi_100511102(CACNA1D);ncbi_100524640(PCLO);ncbi_397184(PRKCA);ncbi_100155970(ADCY5);ncbi_100624934(ADCY1);ncbi_102165175(RIMS2);ncbi_100154587(KCNMB4);ncbi_100623628(PRKACB)	K04944+K04515+K04515+K04560+K04851+K16882+K02677+K08045+K08041+K15297+K04941+K04345	Com_6717_pos;Com_18786_neg	C01996+C00575
Metabolism	Carbohydrate metabolism	Fructose and mannose metabolism	6	32	0.0548073	0.324628	2	ko00051	ncbi_100157582(TPI1);ncbi_100512013(ALDOC);ncbi_100154551(MPI);ncbi_100521394(PFKP);ncbi_100621757(PFKL);ncbi_110260081(ALDOA)	K01803+K01623+K01809+K00850+K00850+K01623	Com_5747_neg;Com_999_neg	C00111+C00392
Environmental Information Processing	Signal transduction	FoxO signaling pathway	17	130	0.0579439	0.332568	2	ko04068	ncbi_406191(TNFSF10);ncbi_733657(FBXO32);ncbi_100125959(MDM2);ncbi_100329128(SKP2);ncbi_100157793(PRKAB2);ncbi_100511070(HOMER1);ncbi_100512686(IRS1);ncbi_100154319(SOD2);ncbi_397568(CAT);ncbi_100156226(EP300);ncbi_100521736(MAPK10);ncbi_100525560(CDKN2D);ncbi_100517044(PLK4);ncbi_100738589(CCND1);ncbi_100739510(PIK3R2);ncbi_100621202(S1PR1);ncbi_110261579(FOXG1)	K04721+K10305+K06643+K03875+K07199+K15010+K16172+K04564+K03781+K04498+K04440+K06623+K08863+K04503+K02649+K04288+K09385	Com_27274_pos;Com_308_neg	C00020+C00025
Organismal Systems	Digestive system	Salivary secretion	11	75	0.0586822	0.332568	3	ko04970	ncbi_444999(GUCY1B3);ncbi_553100(GUCY1A3);ncbi_733672(CST3);ncbi_100144471(ADRA1A);ncbi_100511702(CD38);ncbi_100625149(LOC100625149);ncbi_397184(PRKCA);ncbi_397454(ITPR1);ncbi_100155970(ADCY5);ncbi_100624934(ADCY1);ncbi_100623628(PRKACB)	K12319+K12318+K13899+K04135+K01242+K12319+K02677+K04958+K08045+K08041+K04345	Com_6717_pos;Com_5511_neg;Com_18786_neg	C01996+C13050+C00575
Environmental Information Processing	Signal transduction	AMPK signaling pathway	16	121	0.0593871	0.332568	4	ko04152	ncbi_733702(CD36);ncbi_403154(CFTR);ncbi_100144471(ADRA1A);ncbi_399527(CPT1A);ncbi_100157793(PRKAB2);ncbi_100627508(EIF4EBP1);ncbi_100512686(IRS1);ncbi_397089(PPP2R2B);ncbi_397308(SREBF1);ncbi_100519104(CAB39L);ncbi_397470(PPP2R1B);ncbi_100521394(PFKP);ncbi_100154726(TSC1);ncbi_100621757(PFKL);ncbi_100738589(CCND1);ncbi_100739510(PIK3R2)	K06259+K05031+K04135+K08765+K07199+K07205+K16172+K04354+K07197+K08272+K03456+K00850+K07206+K00850+K04503+K02649	Com_27274_pos;Com_24643_pos;Com_4049_neg;Com_8323_neg	C00020+C00003+C00003+C04677
Organismal Systems	Nervous system	Cholinergic synapse	15	112	0.0607088	0.333899	3	ko04725	ncbi_397394(CAMK2G);ncbi_100157949(GNB5);ncbi_100516483(CHRM4);ncbi_100626014(CAMK2A);ncbi_100511102(CACNA1D);ncbi_397184(PRKCA);ncbi_100034246(PIK3R6);ncbi_110256150(KCNJ12);ncbi_397454(ITPR1);ncbi_100155970(ADCY5);ncbi_100624934(ADCY1);ncbi_397326(KCNQ1);ncbi_100739510(PIK3R2);ncbi_100623628(PRKACB);ncbi_100049703(BCL2)	K04515+K04539+K04132+K04515+K04851+K02677+K21290+K05005+K04958+K08045+K08041+K04926+K02649+K04345+K02161	Com_233_pos;Com_6717_pos;Com_18786_neg	C00114+C01996+C00575
Metabolism	Amino acid metabolism	Valine, leucine and isoleucine degradation	8	50	0.0652226	0.352431	2	ko00280	ncbi_100142669(BCKDHB);ncbi_100524223(HMGCS1);ncbi_100523701(AOX1);ncbi_396978(OXCT1);ncbi_100518224(MCCC2);ncbi_100524103(PCCA);ncbi_100624482(MCCC1);ncbi_448846(EHHADH)	K00167+K01641+K00157+K01027+K01969+K01965+K01968+K07514	Com_1934_pos;Com_2034_neg	C00141+C02170
Organismal Systems	Aging	Longevity regulating pathway - multiple species	9	61	0.079909	0.390666	1	ko04213	ncbi_100157793(PRKAB2);ncbi_100512686(IRS1);ncbi_100154319(SOD2);ncbi_397568(CAT);ncbi_100156170(HDAC2);ncbi_100155970(ADCY5);ncbi_100624934(ADCY1);ncbi_100739510(PIK3R2);ncbi_100623628(PRKACB)	K07199+K16172+K04564+K03781+K06067+K08045+K08041+K02649+K04345	Com_18786_neg	C00575
Organismal Systems	Circulatory system	Adrenergic signaling in cardiomyocytes	17	137	0.0856145	0.41202	2	ko04261	ncbi_100037999(TPM1);ncbi_100144471(ADRA1A);ncbi_397089(PPP2R2B);ncbi_397394(CAMK2G);ncbi_100626014(CAMK2A);ncbi_100519605(CACNG7);ncbi_100511102(CACNA1D);ncbi_397470(PPP2R1B);ncbi_397184(PRKCA);ncbi_100034246(PIK3R6);ncbi_100155970(ADCY5);ncbi_100624934(ADCY1);ncbi_397326(KCNQ1);ncbi_100524021(CACNB3);ncbi_100623628(PRKACB);ncbi_100049703(BCL2);MSTRG.23103(CACNG8)	K10373+K04135+K04354+K04515+K04515+K04872+K04851+K03456+K02677+K21290+K08045+K08041+K04926+K04864+K04345+K02161+K04873	Com_10082_pos;Com_18786_neg	C00788+C00575
Organismal Systems	Digestive system	Gastric acid secretion	10	72	0.0928354	0.436664	2	ko04971	ncbi_403154(CFTR);ncbi_397394(CAMK2G);ncbi_396848(MYLK);ncbi_100626014(CAMK2A);ncbi_397184(PRKCA);ncbi_397454(ITPR1);ncbi_100155970(ADCY5);ncbi_100624934(ADCY1);ncbi_397326(KCNQ1);ncbi_100623628(PRKACB)	K05031+K04515+K00907+K04515+K02677+K04958+K08045+K08041+K04926+K04345	Com_6717_pos;Com_18786_neg	C01996+C00575
Human Diseases	Cancers	Basal cell carcinoma	9	63	0.0937287	0.436664	1	ko05217	ncbi_100170126(LEF1);ncbi_100153445(WNT7A);ncbi_100516839(WNT2);ncbi_100625784(FZD9);ncbi_100739604(AXIN2);ncbi_100516888(GLI3);ncbi_100512951(TCF7);ncbi_100516268(WNT5B);ncbi_100623280(PTCH2)	K04492+K00572+K00182+K02842+K04385+K06230+K02620+K00444+K11101	Com_40620_pos	C00187
Organismal Systems	Immune system	Platelet activation	15	120	0.0971087	0.436664	3	ko04611	ncbi_444999(GUCY1B3);ncbi_553100(GUCY1A3);ncbi_399543(VWF);ncbi_396848(MYLK);ncbi_100622305(PTGIR);ncbi_503666(P2RY1);ncbi_100625149(LOC100625149);ncbi_503667(CAMKK1);ncbi_100034246(PIK3R6);ncbi_397454(ITPR1);ncbi_100155970(ADCY5);ncbi_100624934(ADCY1);ncbi_100739510(PIK3R2);ncbi_100514580(ARHGAP35);ncbi_100623628(PRKACB)	K12319+K12318+K03900+K00907+K04263+K04270+K12319+K05215+K21290+K04958+K08045+K08041+K02649+K05732+K04345	Com_13965_pos;Com_18786_neg;Com_5_neg	C01312+C00575+C00219
Metabolism	Carbohydrate metabolism	Pyruvate metabolism	6	37	0.0978241	0.436664	4	ko00620	ncbi_407245(LDHA);ncbi_396894(MDH1);ncbi_397538(ME1);ncbi_100158154(PKM);ncbi_100294678(PDHA1);ncbi_100524659(ME2)	K00016+K00025+K00029+K00873+K00161+K00027	Com_2463_pos;Com_2068_neg;Com_1305_neg;Com_5238_neg	C02504+C00074+C00149+C00122
Organismal Systems	Digestive system	Fat digestion and absorption	6	37	0.0978241	0.436664	1	ko04975	ncbi_733702(CD36);ncbi_100233200(PLPP2);ncbi_396968(GOT2);ncbi_397681(APOA4);ncbi_397691(APOA1);ncbi_100512419(PLPP3)	K06259+K01080+K14455+K08760+K08757+K01080	Com_40620_pos	C00187
Human Diseases	Substance dependence	Amphetamine addiction	9	64	0.10113	0.438707	5	ko05031	ncbi_100144487(DRD1);ncbi_396913(JUN);ncbi_397394(CAMK2G);ncbi_100626014(CAMK2A);ncbi_100512594(STX1A);ncbi_100511102(CACNA1D);ncbi_397184(PRKCA);ncbi_100155970(ADCY5);ncbi_100623628(PRKACB)	K04144+K04448+K04515+K04515+K04560+K04851+K02677+K08045+K04345	Com_22_pos;Com_2319_pos;Com_308_neg;Com_71_neg;Com_18786_neg	C03758+C00355+C00025+C00082+C00575
Cellular Processes	Cellular community - eukaryotes	Gap junction	11	86	0.125478	0.529414	3	ko04540	ncbi_444999(GUCY1B3);ncbi_553100(GUCY1A3);ncbi_100144487(DRD1);ncbi_100151951(TUBA4A);ncbi_100524161(PDGFD);ncbi_100625149(LOC100625149);ncbi_397184(PRKCA);ncbi_397454(ITPR1);ncbi_100155970(ADCY5);ncbi_100624934(ADCY1);ncbi_100623628(PRKACB)	K12319+K12318+K04144+K07374+K05450+K12319+K02677+K04958+K08045+K08041+K04345	Com_22_pos;Com_308_neg;Com_18786_neg	C03758+C00025+C00575
Environmental Information Processing	Signal transduction	HIF-1 signaling pathway	12	96	0.128076	0.533072	1	ko04066	ncbi_396696(HIF1A);ncbi_396823(GAPDH);ncbi_100627508(EIF4EBP1);ncbi_397394(CAMK2G);ncbi_100156226(EP300);ncbi_100626014(CAMK2A);ncbi_100294678(PDHA1);ncbi_397184(PRKCA);ncbi_100739510(PIK3R2);ncbi_100517077(MKNK2);ncbi_100738870(ENO1);ncbi_100049703(BCL2)	K08268+K00134+K07205+K04515+K04498+K04515+K00161+K02677+K02649+K04372+K01689+K02161	Com_9531_neg	C00072
Metabolism	Lipid metabolism	Glycerolipid metabolism	8	59	0.137643	0.545123	1	ko00561	ncbi_100170771(LPIN3);ncbi_100233200(PLPP2);ncbi_100049690(PNPLA3);ncbi_397537(LPL);ncbi_100512419(PLPP3);ncbi_100522516(GLYCTK);ncbi_100524113(MOGAT1);ncbi_100521167(DGKI)	K15728+K01080+K13534+K01059+K01080+K11529+K14458+K00901	Com_5747_neg	C00111
Metabolism	Lipid metabolism	Fatty acid degradation	6	41	0.142037	0.545379	1	ko00071	ncbi_448980(ACSL4);ncbi_399527(CPT1A);ncbi_100233169(ACSL3);ncbi_396931(ACADL);ncbi_100522477(GCDH);ncbi_448846(EHHADH)	K01897+K08765+K01897+K00255+K00252+K07514	Com_6565_neg	C00489
Organismal Systems	Aging	Longevity regulating pathway - mammal	11	89	0.148961	0.545379	5	ko04211	ncbi_100157793(PRKAB2);ncbi_100627508(EIF4EBP1);ncbi_100512686(IRS1);ncbi_100154319(SOD2);ncbi_397568(CAT);ncbi_100155970(ADCY5);ncbi_100154726(TSC1);ncbi_100624934(ADCY1);ncbi_100739510(PIK3R2);ncbi_100523876(SESN1);ncbi_100623628(PRKACB)	K07199+K07205+K16172+K04564+K03781+K08045+K07206+K08041+K02649+K10141+K04345	Com_27274_pos;Com_24643_pos;Com_18786_neg;Com_4049_neg;Com_1844_neg	C00020+C00003+C00575+C00003+C07909
Environmental Information Processing	Signaling molecules and interaction	Neuroactive ligand-receptor interaction	29	273	0.150441	0.545379	15	ko04080	ncbi_414284(GLRB);ncbi_450248(P2RY2);ncbi_414911(EDNRB);ncbi_100144442(F2);ncbi_100144471(ADRA1A);ncbi_100144487(DRD1);ncbi_100141401(S1PR5);ncbi_396592(TSPO);ncbi_397092(OXTR);ncbi_397126(PTGFR);ncbi_397457(EDNRA);ncbi_397547(NPY1R);ncbi_100524418(PTGDR);ncbi_100516483(CHRM4);ncbi_100525792(GABRP);ncbi_100127164(PTGER2);ncbi_100622305(PTGIR);ncbi_100620836(MLNR);ncbi_100738399(LPAR6);ncbi_100523…	K05196+K04269+K04198+K01313+K04135+K04144+K04295+K05770+K04229+K04262+K04197+K04204+K04332+K04132+K05189+K04259+K04263+K05266+K04273+K04149+K04270+K05219+K05206+K04267+K05215+K04261+K04211+K04288+K08375	Com_6717_pos;Com_190_pos;Com_22_pos;Com_12527_pos;Com_10082_pos;Com_8549_pos;Com_20746_pos;Com_13965_pos;Com_7312_pos;Com_7196_pos;Com_13476_pos;Com_308_neg;Com_2837_neg;Com_2258_neg;Com_4508_neg	C01996+C00212+C03758+C01598+C00788+C00735+C00735+C01312+C05951+C02166+C05952+C00025+C00049+C02165+C00696
Human Diseases	Infectious diseases	African trypanosomiasis	5	33	0.154919	0.545379	3	ko05143	ncbi_396750(ICAM1);ncbi_397508(SELE);ncbi_397691(APOA1);ncbi_397184(PRKCA);ncbi_100737768(LOC100737768)	K06490+K06494+K08757+K02677+K13822	Com_4186_neg;Com_5515_neg;Com_4508_neg	C00328+C00078+C00696
Metabolism	Energy metabolism	Nitrogen metabolism	3	16	0.157593	0.545379	1	ko00910	ncbi_494016(CA3);ncbi_100152714(LOC100152714);ncbi_100157869(CA8)	K01672+K01672+K01672	Com_308_neg	C00025
Organismal Systems	Endocrine system	Thyroid hormone signaling pathway	13	112	0.174432	0.581304	1	ko04919	ncbi_100125959(MDM2);ncbi_100135659(NCOA3);ncbi_396696(HIF1A);ncbi_100511902(RCAN1);ncbi_100156170(HDAC2);ncbi_100156226(EP300);ncbi_100520327(MED4);ncbi_397184(PRKCA);ncbi_100628203(MED13);ncbi_100738589(CCND1);ncbi_100739510(PIK3R2);ncbi_100513770(SLC16A10);ncbi_100623628(PRKACB)	K06643+K11256+K08268+K17901+K06067+K04498+K15146+K02677+K15164+K04503+K02649+K08187+K04345	Com_18786_neg	C00575
Environmental Information Processing	Signal transduction	Hedgehog signaling pathway	6	44	0.180229	0.581304	1	ko04340	ncbi_100516888(GLI3);ncbi_100738589(CCND1);ncbi_100155594(GPR161);ncbi_100623628(PRKACB);ncbi_100623280(PTCH2);ncbi_100049703(BCL2)	K06230+K04503+K08439+K04345+K11101+K02161	Com_18786_neg	C00575
Environmental Information Processing	Signal transduction	Phospholipase D signaling pathway	16	144	0.185554	0.581304	2	ko04072	ncbi_100233200(PLPP2);ncbi_397126(PTGFR);ncbi_100512419(PLPP3);ncbi_100511026(GAB1);ncbi_100738399(LPAR6);ncbi_100515446(CYTH1);ncbi_100524161(PDGFD);ncbi_397184(PRKCA);ncbi_100034246(PIK3R6);ncbi_100155970(ADCY5);ncbi_100154726(TSC1);ncbi_100124654(CXCR2);ncbi_100515345(LOC100515345);ncbi_100624934(ADCY1);ncbi_100521167(DGKI);ncbi_100739510(PIK3R2)	K01080+K04262+K01080+K09593+K04273+K18441+K05450+K02677+K21290+K08045+K07206+K05050+K04175+K08041+K00901+K02649	Com_308_neg;Com_18786_neg	C00025+C00575
Organismal Systems	Endocrine system	Regulation of lipolysis in adipocyte	7	54	0.186567	0.581304	6	ko04923	ncbi_100512686(IRS1);ncbi_397547(NPY1R);ncbi_100155970(ADCY5);ncbi_100624934(ADCY1);ncbi_100516060(PDE3B);ncbi_100739510(PIK3R2);ncbi_100623628(PRKACB)	K16172+K04204+K08045+K08041+K13296+K02649+K04345	Com_27274_pos;Com_190_pos;Com_10082_pos;Com_18786_neg;Com_7286_neg;Com_5_neg	C00020+C00212+C00788+C00575+C02140+C00219
Metabolism	Amino acid metabolism	Cysteine and methionine metabolism	6	45	0.193793	0.582976	8	ko00270	ncbi_407245(LDHA);ncbi_100156922(MAT1A);ncbi_396894(MDH1);ncbi_396968(GOT2);ncbi_100153977(GCLM);ncbi_100514931(AHCYL2)	K00016+K00789+K00025+K14455+K11205+K01251	Com_225_pos;Com_1002_pos;Com_4549_pos;Com_28093_pos;Com_27705_pos;Com_37822_pos;Com_2837_neg;Com_6126_neg	C00073+C00170+C00606+C00051+C01817+C00019+C00049+C01005
Metabolism	Amino acid metabolism	Alanine, aspartate and glutamate metabolism	5	36	0.20017	0.58912	5	ko00250	ncbi_100142661(ASPA);ncbi_396968(GOT2);ncbi_397677(FOLH1B);ncbi_100152915(RIMKLB);ncbi_100522503(PPAT)	K01437+K14455+K14592+K18310+K00764	Com_38082_pos;Com_489_neg;Com_308_neg;Com_2837_neg;Com_5238_neg	C03406+C00158+C00025+C00049+C00122
Human Diseases	Infectious diseases	HTLV-I infection	26	252	0.206124	0.598776	1	ko05166	ncbi_414912(SPI1);ncbi_100037288(SLA-3);ncbi_100134969(NFATC2);ncbi_100135037(SLA-6);ncbi_396592(TSPO);ncbi_396750(ICAM1);ncbi_396913(JUN);ncbi_397208(CSF2);ncbi_397395(CD40);ncbi_397659(VDAC2);ncbi_100156226(EP300);ncbi_100517563(TBPL1);ncbi_100153445(WNT7A);ncbi_100516839(WNT2);ncbi_100521651(POLE2);ncbi_100625784(FZD9);ncbi_100621776(IL2RB);ncbi_100155970(ADCY5);ncbi_110257220(MSX2);ncbi_10062…	K09438+K06751+K17332+K06751+K05770+K06490+K04448+K05427+K03160+K15040+K04498+K03120+K00572+K00182+K02325+K02842+K05069+K08045+K09341+K08041+K04503+K02649+K00444+K04345+K16334+K06751	Com_18786_neg	C00575
Metabolism	Nucleotide metabolism	Pyrimidine metabolism	11	96	0.211654	0.603603	11	ko00240	ncbi_100157138(PNP);ncbi_100517354(DCK);ncbi_100521651(POLE2);ncbi_100516797(LOC100516797);ncbi_100154506(ENTPD5);ncbi_100620107(CANT1);ncbi_102166485(POLA1);ncbi_100316853(RRM2);ncbi_100623872(CMPK2);ncbi_100037271(ENPP1);ncbi_100152763(NME7)	K03783+K00893+K02325+K01081+K01511+K12304+K02320+K10808+K13809+K01513+K00940	Com_2489_pos;Com_2801_pos;Com_1279_pos;Com_1170_neg;Com_53_neg;Com_2034_neg;Com_8134_neg;Com_19942_neg;Com_25688_neg;Com_1838_neg;Com_884_neg	C00475+C00380+C00105+C00214+C00299+C02170+C00112+C01346+C00364+C00106+C00055
Organismal Systems	Excretory system	Aldosterone-regulated sodium reabsorption	5	37	0.216161	0.605251	4	ko04960	ncbi_733625(SFN);ncbi_100192448(SLC9A3R2);ncbi_100512686(IRS1);ncbi_397184(PRKCA);ncbi_100739510(PIK3R2)	K06644+K13358+K16172+K02677+K02649	Com_8549_pos;Com_20746_pos;Com_1105_pos;Com_18786_neg	C00735+C00735+C00762+C00575
Human Diseases	Neurodegenerative diseases	Amyotrophic lateral sclerosis (ALS)	6	48	0.236596	0.63152	2	ko05014	ncbi_397244(CASP3);ncbi_397568(CAT);ncbi_100625407(NEFM);ncbi_100156492(NEFH);ncbi_100626864(ALS2);ncbi_100049703(BCL2)	K02187+K03781+K04573+K04574+K04575+K02161	Com_308_neg;Com_3253_neg	C00025+C00062
Human Diseases	Cancers	Renal cell carcinoma	8	68	0.237441	0.63152	2	ko05211	ncbi_396696(HIF1A);ncbi_396913(JUN);ncbi_100157219(ARNT2);ncbi_100156226(EP300);ncbi_100511026(GAB1);ncbi_100152316(PAK5);ncbi_100624533(PAK3);ncbi_100739510(PIK3R2)	K08268+K04448+K15589+K04498+K09593+K05736+K05733+K02649	Com_1305_neg;Com_5238_neg	C00149+C00122
Metabolism	Amino acid metabolism	Lysine degradation	7	58	0.237845	0.63152	4	ko00310	ncbi_100513962(AASS);ncbi_100522477(GCDH);ncbi_100524976(NSD1);ncbi_100515702(TMLHE);ncbi_100624924(COLGALT2);ncbi_448846(EHHADH);ncbi_100737360(CAMKMT)	K14157+K00252+K15588+K00474+K11703+K07514+K18826	Com_8813_pos;Com_10028_pos;Com_11095_neg;Com_6565_neg	C02727+C00047+C00449+C00489
Organismal Systems	Endocrine system	GnRH signaling pathway	10	89	0.244656	0.638593	2	ko04912	ncbi_396913(JUN);ncbi_397394(CAMK2G);ncbi_100626014(CAMK2A);ncbi_100521736(MAPK10);ncbi_100511102(CACNA1D);ncbi_397184(PRKCA);ncbi_397454(ITPR1);ncbi_100155970(ADCY5);ncbi_100624934(ADCY1);ncbi_100623628(PRKACB)	K04448+K04515+K04515+K04440+K04851+K02677+K04958+K08045+K08041+K04345	Com_18786_neg;Com_5_neg	C00575+C00219
Metabolism	Amino acid metabolism	Glycine, serine and threonine metabolism	5	40	0.266248	0.651847	6	ko00260	ncbi_100525698(GCAT);ncbi_100522516(GLYCTK);ncbi_100154776(PGAM1);ncbi_100151982(CHDH);ncbi_100155425(GLDC)	K00639+K11529+K01834+K00108+K00281	Com_4291_pos;Com_233_pos;Com_196_pos;Com_2837_neg;Com_5515_neg;Com_6126_neg	C00188+C00114+C00300+C00049+C00078+C01005
Metabolism	Amino acid metabolism	Phenylalanine metabolism	3	21	0.274518	0.65799	9	ko00360	ncbi_397412(MIF);ncbi_396968(GOT2);ncbi_100526075(ALDH3A1)	K07253+K14455+K00129	Com_17_pos;Com_3373_pos;Com_288_neg;Com_43_neg;Com_71_neg;Com_734_neg;Com_28_neg;Com_5238_neg;Com_3341_neg	C00079+C01586+C00423+C05598+C00082+C00805+C02265+C00122+C00166
Metabolism	Metabolism of terpenoids and polyketides	Terpenoid backbone biosynthesis	3	21	0.274518	0.65799	2	ko00900	ncbi_100524223(HMGCS1);ncbi_100154658(NUS1);ncbi_100625049(LOC100625049)	K01641+K19177+K01823	Com_2224_neg;Com_14600_neg	C00353+C00418
Metabolism	Metabolism of other amino acids	beta-Alanine metabolism	4	31	0.282226	0.660806	7	ko00410	ncbi_100152781(SMOX);ncbi_100516053(CNDP1);ncbi_100526075(ALDH3A1);ncbi_448846(EHHADH)	K12259+K05604+K00129+K07514	Com_136_pos;Com_156_pos;Com_92_pos;Com_754_neg;Com_2837_neg;Com_1838_neg;Com_3976_neg	C00750+C00864+C00315+C00135+C00049+C00106+C00386
Organismal Systems	Endocrine system	Insulin signaling pathway	14	135	0.285348	0.660806	1	ko04910	ncbi_100307052(SOCS1);ncbi_100157793(PRKAB2);ncbi_100627508(EIF4EBP1);ncbi_100512686(IRS1);ncbi_397308(SREBF1);ncbi_100521736(MAPK10);ncbi_100153151(SORBS1);ncbi_100625881(PHKB);ncbi_100154726(TSC1);ncbi_100516060(PDE3B);ncbi_100739510(PIK3R2);ncbi_100517077(MKNK2);ncbi_100623628(PRKACB);ncbi_110262251(PRKAR2B)	K04694+K07199+K07205+K16172+K07197+K04440+K06086+K07190+K07206+K13296+K02649+K04372+K04345+K04739	Com_18786_neg	C00575
Human Diseases	Cancers	Prostate cancer	10	93	0.28927	0.664889	6	ko05215	ncbi_396762(FGFR2);ncbi_100125959(MDM2);ncbi_100170126(LEF1);ncbi_397582(AR);ncbi_100156226(EP300);ncbi_100524161(PDGFD);ncbi_100738589(CCND1);ncbi_100739510(PIK3R2);ncbi_100512951(TCF7);ncbi_100049703(BCL2)	K05093+K06643+K04492+K08557+K04498+K05450+K04503+K02649+K02620+K02161	Com_33974_pos;Com_25418_pos;Com_5124_pos;Com_8549_pos;Com_20746_pos;Com_1105_pos	C00280+C00535+C00951+C00735+C00735+C00762
Organismal Systems	Nervous system	Dopaminergic synapse	13	126	0.301606	0.688109	5	ko04728	ncbi_100144487(DRD1);ncbi_397089(PPP2R2B);ncbi_397394(CAMK2G);ncbi_397448(KCNJ5);ncbi_100157949(GNB5);ncbi_100626014(CAMK2A);ncbi_100521736(MAPK10);ncbi_100511102(CACNA1D);ncbi_397470(PPP2R1B);ncbi_397184(PRKCA);ncbi_397454(ITPR1);ncbi_100155970(ADCY5);ncbi_100623628(PRKACB)	K04144+K04354+K04515+K04999+K04539+K04515+K04440+K04851+K03456+K02677+K04958+K08045+K04345	Com_22_pos;Com_2319_pos;Com_71_neg;Com_18786_neg;Com_9194_neg	C03758+C00355+C00082+C00575+C05582
Environmental Information Processing	Signal transduction	mTOR signaling pathway	15	148	0.306603	0.694365	1	ko04150	ncbi_100329128(SKP2);ncbi_100153821(DDIT4);ncbi_100627508(EIF4EBP1);ncbi_100512686(IRS1);ncbi_100514221(TELO2);ncbi_100519104(CAB39L);ncbi_100153445(WNT7A);ncbi_100516839(WNT2);ncbi_100625784(FZD9);ncbi_397184(PRKCA);ncbi_100154726(TSC1);ncbi_100739510(PIK3R2);ncbi_100157658(DEPTOR);ncbi_100516268(WNT5B);ncbi_106504653(FNIP2)	K03875+K08270+K07205+K16172+K11137+K08272+K00572+K00182+K02842+K02677+K07206+K02649+K20402+K00444+K20401	Com_27274_pos	C00020
Metabolism	Amino acid metabolism	Tryptophan metabolism	5	43	0.318572	0.711016	12	ko00380	ncbi_100523701(AOX1);ncbi_397568(CAT);ncbi_100157176(KYAT3);ncbi_100522477(GCDH);ncbi_448846(EHHADH)	K00157+K03781+K00816+K00252+K07514	Com_3922_pos;Com_99_pos;Com_4321_pos;Com_36850_pos;Com_12527_pos;Com_1426_pos;Com_16022_pos;Com_13899_pos;Com_4186_neg;Com_5515_neg;Com_3728_neg;Com_283_neg	C01717+C00954+C02470+C05635+C01598+C00643+C02700+C05635+C00328+C00078+C05643+C00331
Organismal Systems	Nervous system	Long-term potentiation	7	64	0.321675	0.712344	2	ko04720	ncbi_397394(CAMK2G);ncbi_100156226(EP300);ncbi_100626014(CAMK2A);ncbi_397184(PRKCA);ncbi_397454(ITPR1);ncbi_100624934(ADCY1);ncbi_100623628(PRKACB)	K04515+K04498+K04515+K02677+K04958+K08041+K04345	Com_308_neg;Com_18786_neg	C00025+C00575
Organismal Systems	Digestive system	Protein digestion and absorption	9	86	0.332421	0.726139	11	ko04974	ncbi_397533(COL5A1);ncbi_100158059(COL14A1);ncbi_414914(COL17A1);ncbi_100516642(COL6A6);ncbi_110257487(COL9A3);ncbi_397326(KCNQ1);ncbi_100622020(SLC8A1);ncbi_102157845(COL24A1);ncbi_100513770(SLC16A10)	K19721+K08133+K07603+K06238+K08131+K04926+K05849+K19721+K08187	Com_4291_pos;Com_17_pos;Com_225_pos;Com_14161_pos;Com_10028_pos;Com_754_neg;Com_308_neg;Com_71_neg;Com_2837_neg;Com_3253_neg;Com_5515_neg	C00188+C00079+C00073+C00146+C00047+C00135+C00025+C00082+C00049+C00062+C00078
Metabolism	Carbohydrate metabolism	Butanoate metabolism	3	24	0.348485	0.755868	2	ko00650	ncbi_100524223(HMGCS1);ncbi_396978(OXCT1);ncbi_448846(EHHADH)	K01641+K01027+K07514	Com_308_neg;Com_5238_neg	C00025+C00122
Organismal Systems	Immune system	Leukocyte transendothelial migration	11	110	0.361156	0.777829	1	ko04670	ncbi_414737(CDH5);ncbi_494460(CXCL12);ncbi_733578(CLDN4);ncbi_396750(ICAM1);ncbi_396974(VCL);ncbi_397459(ITGAM);ncbi_100519699(CTNND1);ncbi_397184(PRKCA);ncbi_100739510(PIK3R2);ncbi_100151826(VAV3);ncbi_100514580(ARHGAP35)	K06533+K10031+K06087+K06490+K05700+K06461+K05690+K02677+K02649+K05730+K05732	Com_18786_neg	C00575
Metabolism	Amino acid metabolism	Tyrosine metabolism	4	35	0.36366	0.777829	11	ko00350	ncbi_397412(MIF);ncbi_100523701(AOX1);ncbi_396968(GOT2);ncbi_100526075(ALDH3A1)	K07253+K00157+K14455+K00129	Com_22_pos;Com_19473_pos;Com_10565_pos;Com_10082_pos;Com_13721_pos;Com_14161_pos;Com_2319_pos;Com_71_neg;Com_4434_neg;Com_9194_neg;Com_5238_neg	C03758+C05579+C05589+C00788+C00544+C00146+C00355+C00082+C01179+C05582+C00122
Organismal Systems	Digestive system	Bile secretion	7	68	0.380055	0.788678	31	ko04976	ncbi_403154(CFTR);ncbi_397073(ABCG2);ncbi_407773(AQP1);ncbi_100152536(ABCC4);ncbi_100155970(ADCY5);ncbi_100624934(ADCY1);ncbi_100623628(PRKACB)	K05031+K05681+K09864+K05673+K08045+K08041+K04345	Com_233_pos;Com_6717_pos;Com_1160_pos;Com_136_pos;Com_16856_pos;Com_22_pos;Com_2773_pos;Com_40620_pos;Com_8965_pos;Com_9777_pos;Com_92_pos;Com_5_pos;Com_28093_pos;Com_8549_pos;Com_20746_pos;Com_18580_pos;Com_31514_pos;Com_7196_pos;Com_1406_pos;Com_657_neg;Com_3197_neg;Com_734_neg;Com_14443_neg;Com_18786_neg;Com_2700_neg;Com_2258_neg;Com_20674_neg;Com_4463_neg;Com_18982_neg;Com_3874_neg;Com_7427_n…	C00114+C01996+C00318+C00750+C05122+C03758+C06999+C00187+C07184+C09955+C00315+C05551+C00051+C00735+C00735+C07966+C06526+C02166+C03990+C06804+C00366+C00805+C00486+C00575+C03642+C02165+C05466+C01921+C04483+C05465+C00504
Organismal Systems	Endocrine system	Ovarian Steroidogenesis	5	47	0.38983	0.789918	9	ko04913	ncbi_445539(HSD3B1);ncbi_100524940(LOC100524940);ncbi_100155970(ADCY5);ncbi_100624934(ADCY1);ncbi_100623628(PRKACB)	K00070+K07418+K08045+K08041+K04345	Com_33974_pos;Com_25418_pos;Com_40620_pos;Com_5124_pos;Com_43797_pos;Com_36804_pos;Com_18786_neg;Com_1951_neg;Com_5_neg	C00280+C00535+C00187+C00951+C00468+C01953+C00575+C05356+C00219
Organismal Systems	Nervous system	Long-term depression	6	58	0.393009	0.791155	2	ko04730	ncbi_444999(GUCY1B3);ncbi_553100(GUCY1A3);ncbi_397470(PPP2R1B);ncbi_100625149(LOC100625149);ncbi_397184(PRKCA);ncbi_397454(ITPR1)	K12319+K12318+K03456+K12319+K02677+K04958	Com_308_neg;Com_5_neg	C00025+C00219
Organismal Systems	Sensory system	Phototransduction	3	27	0.421633	0.801138	1	ko04744	ncbi_100157237(GNAT1);ncbi_100523457(LOC100523457);ncbi_100739200(GUCA1A)	K04631+K12321+K08328	Com_6944_pos	C00144
Organismal Systems	Immune system	Fc gamma R-mediated phagocytosis	8	82	0.422921	0.801138	1	ko04666	ncbi_100233200(PLPP2);ncbi_100512419(PLPP3);ncbi_100628001(MARCKSL1);ncbi_100155782(WASF3);ncbi_397184(PRKCA);ncbi_100739510(PIK3R2);ncbi_106509950(ASAP1);ncbi_100151826(VAV3)	K01080+K01080+K13536+K06083+K02677+K02649+K12488+K05730	Com_5_neg	C00219
Metabolism	Carbohydrate metabolism	Inositol phosphate metabolism	7	71	0.424142	0.801138	4	ko00562	ncbi_100157582(TPI1);ncbi_100516892(MTM1);ncbi_100525664(SYNJ1);ncbi_100623940(PLCH2);ncbi_100512110(INPP5B);ncbi_100623875(IMPA2);ncbi_100516235(ITPKA)	K01803+K01108+K20279+K19006+K01099+K01092+K00911	Com_21121_pos;Com_15334_neg;Com_992_neg;Com_5747_neg	C01204+C01220+C00137+C00111
Metabolism	Lipid metabolism	Steroid hormone biosynthesis	5	49	0.425395	0.801138	13	ko00140	ncbi_445539(HSD3B1);ncbi_100126281(CYP3A46);ncbi_397687(CYP2D25);ncbi_100738003(LOC100738003);ncbi_100312972(HSD17B12)	K00070+K07424+K07414+K07430+K10251	Com_33974_pos;Com_25418_pos;Com_40620_pos;Com_28650_pos;Com_5124_pos;Com_43797_pos;Com_36804_pos;Com_8549_pos;Com_20746_pos;Com_10212_pos;Com_19053_pos;Com_1105_pos;Com_7286_neg	C00280+C00535+C00187+C00523+C00951+C00468+C01953+C00735+C00735+C05285+C05141+C00762+C02140
Metabolism	Carbohydrate metabolism	Amino sugar and nucleotide sugar metabolism	5	49	0.425395	0.801138	4	ko00520	ncbi_641344(GNE);ncbi_100155883(NANS);ncbi_100154551(MPI);ncbi_397602(GPI);ncbi_100518994(NANP)	K12409+K05304+K01809+K01810+K01097	Com_38009_pos;Com_1597_pos;Com_4817_neg;Com_6759_neg	C00329+C00270+C00167+C00259
Environmental Information Processing	Signal transduction	Sphingolipid signaling pathway	11	116	0.429886	0.802454	1	ko04071	ncbi_100141401(S1PR5);ncbi_397089(PPP2R2B);ncbi_100521736(MAPK10);ncbi_100519280(SPTLC3);ncbi_397470(PPP2R1B);ncbi_397184(PRKCA);ncbi_100739510(PIK3R2);ncbi_733619(ABCC1);ncbi_100621202(S1PR1);ncbi_100049703(BCL2);ncbi_100739329(DEGS2)	K04295+K04354+K04440+K00654+K03456+K02677+K02649+K05665+K04288+K02161+K04712	Com_190_pos	C00212
Metabolism	Global and overview maps	2-Oxocarboxylic acid metabolism	2	17	0.44298	0.807033	15	ko01210	ncbi_100048960(NAGS);ncbi_396968(GOT2)	K11067+K14455	Com_17_pos;Com_225_pos;Com_13748_pos;Com_14326_pos;Com_1934_pos;Com_2463_pos;Com_10028_pos;Com_489_neg;Com_308_neg;Com_71_neg;Com_4434_neg;Com_2837_neg;Com_5515_neg;Com_11743_neg;Com_3341_neg	C00079+C00073+C00437+C00624+C00141+C02504+C00047+C00158+C00025+C00082+C01179+C00049+C00078+C00417+C00166
Organismal Systems	Nervous system	GABAergic synapse	8	84	0.450123	0.810748	2	ko04727	ncbi_100153443(GPHN);ncbi_100157949(GNB5);ncbi_100511102(CACNA1D);ncbi_100525792(GABRP);ncbi_397184(PRKCA);ncbi_100155970(ADCY5);ncbi_100624934(ADCY1);ncbi_100623628(PRKACB)	K15376+K04539+K04851+K05189+K02677+K08045+K08041+K04345	Com_308_neg;Com_18786_neg	C00025+C00575
Metabolism	Carbohydrate metabolism	Citrate cycle (TCA cycle)	3	29	0.468849	0.813227	5	ko00020	ncbi_396894(MDH1);ncbi_100294678(PDHA1);ncbi_399540(SUCLA2)	K00025+K00161+K01900	Com_489_neg;Com_2068_neg;Com_11743_neg;Com_1305_neg;Com_5238_neg	C00158+C00074+C00417+C00149+C00122
Metabolism	Amino acid metabolism	Phenylalanine, tyrosine and tryptophan biosynthesis	1	7	0.471595	0.813227	6	ko00400	ncbi_396968(GOT2)	K14455	Com_17_pos;Com_71_neg;Com_4434_neg;Com_2068_neg;Com_5515_neg;Com_3341_neg	C00079+C00082+C01179+C00074+C00078+C00166
Environmental Information Processing	Signal transduction	Phosphatidylinositol signaling system	9	97	0.472446	0.813227	3	ko04070	ncbi_100516892(MTM1);ncbi_100525664(SYNJ1);ncbi_397184(PRKCA);ncbi_397454(ITPR1);ncbi_100521167(DGKI);ncbi_100739510(PIK3R2);ncbi_100512110(INPP5B);ncbi_100623875(IMPA2);ncbi_100516235(ITPKA)	K01108+K20279+K02677+K04958+K00901+K02649+K01099+K01092+K00911	Com_21121_pos;Com_15334_neg;Com_992_neg	C01204+C01220+C00137
Metabolism	Metabolism of cofactors and vitamins	One carbon pool by folate	2	18	0.473024	0.813227	3	ko00670	ncbi_100622210(ALDH1L1);ncbi_100151976(ALDH1L2)	K00289+K00289	Com_17664_neg;Com_7427_neg;Com_6974_neg	C00440+C00504+C00415
Organismal Systems	Digestive system	Carbohydrate digestion and absorption	4	41	0.484133	0.813227	3	ko04973	ncbi_100516688(SLC37A4);ncbi_100511102(CACNA1D);ncbi_100739510(PIK3R2);ncbi_100625876(SLC2A5)	K08171+K04851+K02649+K08143	Com_1543_pos;Com_140_pos;Com_98_neg	C00208+C00208+C01835
Organismal Systems	Immune system	Fc epsilon RI signaling pathway	6	64	0.488186	0.813227	5	ko04664	ncbi_397392(ALOX5AP);ncbi_397208(CSF2);ncbi_100521736(MAPK10);ncbi_397184(PRKCA);ncbi_100739510(PIK3R2);ncbi_100151826(VAV3)	K20735+K05427+K04440+K02677+K02649+K05730	Com_7312_pos;Com_7196_pos;Com_13476_pos;Com_4508_neg;Com_5_neg	C05951+C02166+C05952+C00696+C00219
Human Diseases	Neurodegenerative diseases	Huntington disease	17	190	0.490677	0.813227	1	ko05016	ncbi_100157621(UQCRB);ncbi_100154319(SOD2);ncbi_397244(CASP3);ncbi_397659(VDAC2);ncbi_100156170(HDAC2);ncbi_100156226(EP300);ncbi_100517563(TBPL1);ncbi_100525371(NDUFA5);ncbi_100624095(DNAI2);ncbi_397454(ITPR1);ncbi_100519335(IFT57);ncbi_100157315(DNAH10);ncbi_100623921(DNAH5);ncbi_100524798(DNAH6);ncbi_808503(COX1);ncbi_808507(COX3);ncbi_808513(CYTB)	K00417+K04564+K02187+K15040+K06067+K04498+K03120+K03949+K11143+K04958+K04638+K10408+K10408+K10408+K02256+K02262+K00412	Com_308_neg	C00025
Organismal Systems	Nervous system	Retrograde endocannabinoid signaling	13	145	0.498869	0.813227	4	ko04723	ncbi_397448(KCNJ5);ncbi_100157949(GNB5);ncbi_100521736(MAPK10);ncbi_100737731(NAPEPLD);ncbi_100511102(CACNA1D);ncbi_100525792(GABRP);ncbi_100525371(NDUFA5);ncbi_397184(PRKCA);ncbi_397454(ITPR1);ncbi_100155970(ADCY5);ncbi_100624934(ADCY1);ncbi_100623628(PRKACB);ncbi_808512(ND6)	K04999+K04539+K04440+K13985+K04851+K05189+K03949+K02677+K04958+K08045+K08041+K04345+K03884	Com_308_neg;Com_18786_neg;Com_18846_neg;Com_5_neg	C00025+C00575+C00689+C00219
Metabolism	Lipid metabolism	Steroid biosynthesis	2	19	0.502068	0.813227	1	ko00100	ncbi_403334(CYP51);ncbi_100515544(SOAT2)	K05917+K00637	Com_40620_pos	C00187
Metabolism	Amino acid metabolism	Arginine biosynthesis	2	19	0.502068	0.813227	7	ko00220	ncbi_100048960(NAGS);ncbi_396968(GOT2)	K11067+K14455	Com_13748_pos;Com_14326_pos;Com_38082_pos;Com_308_neg;Com_2837_neg;Com_3253_neg;Com_5238_neg	C00437+C00624+C03406+C00025+C00049+C00062+C00122
Metabolism	Metabolism of cofactors and vitamins	Pantothenate and CoA biosynthesis	2	19	0.502068	0.813227	4	ko00770	ncbi_100154650(PANK1);ncbi_100037271(ENPP1)	K09680+K01513	Com_156_pos;Com_1934_pos;Com_2837_neg;Com_1838_neg	C00864+C00141+C00049+C00106
Organismal Systems	Nervous system	Serotonergic synapse	10	111	0.503878	0.813227	14	ko04726	ncbi_397244(CASP3);ncbi_397448(KCNJ5);ncbi_397687(CYP2D25);ncbi_100157949(GNB5);ncbi_100524940(LOC100524940);ncbi_100511102(CACNA1D);ncbi_397184(PRKCA);ncbi_397454(ITPR1);ncbi_100155970(ADCY5);ncbi_100623628(PRKACB)	K02187+K04999+K07414+K04539+K07418+K04851+K02677+K04958+K08045+K04345	Com_9468_pos;Com_2176_pos;Com_36850_pos;Com_7196_pos;Com_1426_pos;Com_13899_pos;Com_18786_neg;Com_5515_neg;Com_2275_neg;Com_2258_neg;Com_11596_neg;Com_1951_neg;Com_4508_neg;Com_5_neg	C05957+C05954+C05635+C02166+C00643+C05635+C00575+C00078+C05965+C02165+C05953+C05356+C00696+C00219
Environmental Information Processing	Signal transduction	Rap1 signaling pathway	18	203	0.504306	0.813227	1	ko04015	ncbi_396762(FGFR2);ncbi_100144501(EFNA1);ncbi_100156404(PGF);ncbi_397459(ITGAM);ncbi_100519699(CTNND1);ncbi_503666(P2RY1);ncbi_100517409(RAPGEF2);ncbi_100515047(MAGI2);ncbi_100524161(PDGFD);ncbi_606745(ADORA2B);ncbi_397184(PRKCA);ncbi_100155970(ADCY5);ncbi_100624934(ADCY1);ncbi_100739510(PIK3R2);ncbi_100518179(FLT4);ncbi_100513721(EFNA5);ncbi_100738968(NGF);ncbi_397643(FGF2)	K05093+K05462+K16859+K06461+K05690+K04270+K08018+K05629+K05450+K04267+K02677+K08045+K08041+K02649+K05097+K05462+K02582+K18497	Com_18786_neg	C00575
Metabolism	Carbohydrate metabolism	Galactose metabolism	3	31	0.514259	0.818251	4	ko00052	ncbi_399536(GALM);ncbi_100521394(PFKP);ncbi_100621757(PFKL)	K01785+K00850+K00850	Com_617_pos;Com_992_neg;Com_5747_neg;Com_3294_neg	C00492+C00137+C00111+C02262
Organismal Systems	Digestive system	Pancreatic secretion	8	89	0.516945	0.818251	3	ko04972	ncbi_403154(CFTR);ncbi_100511702(CD38);ncbi_397184(PRKCA);ncbi_396820(ATP2A3);ncbi_397454(ITPR1);ncbi_100155970(ADCY5);ncbi_100624934(ADCY1);ncbi_397326(KCNQ1)	K05031+K01242+K02677+K05853+K04958+K08045+K08041+K04926	Com_6717_pos;Com_5511_neg;Com_18786_neg	C01996+C13050+C00575
Metabolism	Metabolism of cofactors and vitamins	Riboflavin metabolism	1	8	0.517643	0.818251	3	ko00740	ncbi_100037271(ENPP1)	K01513	Com_711_neg;Com_2951_neg;Com_7240_neg	C00199+C00255+C00016
Environmental Information Processing	Signal transduction	MAPK signaling pathway	25	288	0.538042	0.824462	1	ko04010	ncbi_396762(FGFR2);ncbi_100144501(EFNA1);ncbi_100144493(NTF3);ncbi_396913(JUN);ncbi_397244(CASP3);ncbi_397668(AREG);ncbi_100156404(PGF);ncbi_100519605(CACNG7);ncbi_100521736(MAPK10);ncbi_100511102(CACNA1D);ncbi_100628318(IL1RAP);ncbi_100517409(RAPGEF2);ncbi_100519006(DUSP9);ncbi_100524161(PDGFD);ncbi_397184(PRKCA);ncbi_100517077(MKNK2);ncbi_100518179(FLT4);ncbi_100513721(EFNA5);ncbi_110259950(CAC…	K05093+K05462+K04356+K04448+K02187+K09782+K16859+K04872+K04440+K04851+K04723+K08018+K18498+K05450+K02677+K04372+K05097+K05462+K04855+K02582+K04864+K05084+K04345+K18497+K04873	Com_18786_neg	C00575
Metabolism	Carbohydrate metabolism	Starch and sucrose metabolism	3	33	0.557514	0.836098	4	ko00500	ncbi_397602(GPI);ncbi_100620160(GYG1);ncbi_100037271(ENPP1)	K01810+K00750+K01513	Com_1543_pos;Com_140_pos;Com_18846_neg;Com_62_neg	C00208+C00208+C00689+C00252
Metabolism	Lipid metabolism	Ether lipid metabolism	4	45	0.559209	0.836098	1	ko00565	ncbi_100233200(PLPP2);ncbi_503658(ENPP2);ncbi_100512419(PLPP3);ncbi_100517894(LPCAT2)	K01080+K01122+K01080+K13510	Com_634_pos	C00670
Metabolism	Carbohydrate metabolism	Pentose and glucuronate interconversions	2	22	0.582743	0.851592	5	ko00040	ncbi_396914(CRYL1);ncbi_100628009(XYLB)	K13247+K00854	Com_4817_neg;Com_711_neg;Com_6759_neg;Com_5747_neg;Com_13620_neg	C00167+C00199+C00259+C00111+C00379
Organismal Systems	Excretory system	Proximal tubule bicarbonate reclamation	2	22	0.582743	0.851592	3	ko04964	ncbi_396894(MDH1);ncbi_407773(AQP1)	K00025+K09864	Com_308_neg;Com_2068_neg;Com_1305_neg	C00025+C00074+C00149
Human Diseases	Neurodegenerative diseases	Parkinson disease	12	142	0.587576	0.851592	6	ko05012	ncbi_100049698(SNCAIP);ncbi_100144487(DRD1);ncbi_100157621(UQCRB);ncbi_397244(CASP3);ncbi_397659(VDAC2);ncbi_100525371(NDUFA5);ncbi_100155970(ADCY5);ncbi_100623628(PRKACB);ncbi_808503(COX1);ncbi_808507(COX3);ncbi_808512(ND6);ncbi_808513(CYTB)	K04558+K04144+K00417+K02187+K15040+K03949+K08045+K04345+K02256+K02262+K03884+K00412	Com_27274_pos;Com_190_pos;Com_22_pos;Com_2319_pos;Com_71_neg;Com_18786_neg	C00020+C00212+C03758+C00355+C00082+C00575
Organismal Systems	Endocrine system	Thyroid hormone synthesis	6	71	0.592291	0.851592	2	ko04918	ncbi_100156471(TG);ncbi_397184(PRKCA);ncbi_397454(ITPR1);ncbi_100155970(ADCY5);ncbi_100624934(ADCY1);ncbi_100623628(PRKACB)	K10809+K02677+K04958+K08045+K08041+K04345	Com_28093_pos;Com_18786_neg	C00051+C00575
Metabolism	Lipid metabolism	Glycerophospholipid metabolism	8	95	0.593102	0.851592	4	ko00564	ncbi_100170771(LPIN3);ncbi_100233200(PLPP2);ncbi_100512419(PLPP3);ncbi_100624347(GPD1L);ncbi_100517894(LPCAT2);ncbi_397348(GPD2);ncbi_100521167(DGKI);ncbi_110260724(ETNK1)	K15728+K01080+K01080+K00006+K13510+K00111+K00901+K00894	Com_233_pos;Com_6717_pos;Com_634_pos;Com_5747_neg	C00114+C01996+C00670+C00111
Human Diseases	Substance dependence	Cocaine addiction	4	47	0.594455	0.851592	5	ko05030	ncbi_100144487(DRD1);ncbi_396913(JUN);ncbi_100155970(ADCY5);ncbi_100623628(PRKACB)	K04144+K04448+K08045+K04345	Com_22_pos;Com_2319_pos;Com_308_neg;Com_71_neg;Com_18786_neg	C03758+C00355+C00025+C00082+C00575
Human Diseases	Infectious diseases	Pertussis	6	73	0.619936	0.871874	1	ko05133	ncbi_100135660(NOD1);ncbi_396913(JUN);ncbi_397244(CASP3);ncbi_100155091(ITGA5);ncbi_397459(ITGAM);ncbi_100521736(MAPK10)	K08727+K04448+K02187+K06484+K06461+K04440	Com_18786_neg	C00575
Organismal Systems	Nervous system	Glutamatergic synapse	9	110	0.627821	0.878365	2	ko04724	ncbi_100511070(HOMER1);ncbi_100157949(GNB5);ncbi_100511102(CACNA1D);ncbi_397184(PRKCA);ncbi_397454(ITPR1);ncbi_100155970(ADCY5);ncbi_100624934(ADCY1);ncbi_102160500(SHANK2);ncbi_100623628(PRKACB)	K15010+K04539+K04851+K02677+K04958+K08045+K08041+K15009+K04345	Com_308_neg;Com_18786_neg	C00025+C00575
Metabolism	Metabolism of cofactors and vitamins	Ubiquinone and other terpenoid-quinone biosynthesis	1	11	0.633108	0.878365	6	ko00130	ncbi_100518062(VKORC1L1)	K05357	Com_13721_pos;Com_288_neg;Com_71_neg;Com_4434_neg;Com_9718_neg;Com_2224_neg	C00544+C00423+C00082+C01179+C02483+C00353
Metabolism	Metabolism of other amino acids	Glutathione metabolism	4	51	0.659674	0.899024	7	ko00480	ncbi_397567(MGST1);ncbi_100153977(GCLM);ncbi_100517647(CHAC2);ncbi_100316853(RRM2)	K00799+K11205+K07232+K10808	Com_136_pos;Com_92_pos;Com_28093_pos;Com_56_pos;Com_308_neg;Com_24128_neg;Com_9531_neg	C00750+C00315+C00051+C01879+C00025+C03740+C00072
Organismal Systems	Digestive system	Mineral absorption	3	39	0.672365	0.907441	4	ko04978	ncbi_503660(SLC30A1);ncbi_396622(HMOX2);ncbi_397186(SLC31A1)	K14688+K21418+K14686	Com_4291_pos;Com_17_pos;Com_225_pos;Com_5515_neg	C00188+C00079+C00073+C00078
Environmental Information Processing	Signal transduction	Ras signaling pathway	18	226	0.690911	0.921215	1	ko04014	ncbi_396762(FGFR2);ncbi_100144501(EFNA1);ncbi_100144493(NTF3);ncbi_100157949(GNB5);ncbi_100156404(PGF);ncbi_100511026(GAB1);ncbi_100521736(MAPK10);ncbi_100516830(RASSF1);ncbi_100524161(PDGFD);ncbi_397184(PRKCA);ncbi_100152316(PAK5);ncbi_100624533(PAK3);ncbi_100739510(PIK3R2);ncbi_100518179(FLT4);ncbi_100513721(EFNA5);ncbi_100738968(NGF);ncbi_100623628(PRKACB);ncbi_397643(FGF2)	K05093+K05462+K04356+K04539+K16859+K09593+K04440+K09850+K05450+K02677+K05736+K05733+K02649+K05097+K05462+K02582+K04345+K18497	Com_18786_neg	C00575
Organismal Systems	Endocrine system	Estrogen signaling pathway	10	130	0.70593	0.93316	2	ko04915	ncbi_100135659(NCOA3);ncbi_396913(JUN);ncbi_397448(KCNJ5);ncbi_100515339(KRT19);ncbi_397454(ITPR1);ncbi_100155970(ADCY5);ncbi_100624934(ADCY1);ncbi_100739510(PIK3R2);ncbi_100623628(PRKACB);ncbi_100049703(BCL2)	K11256+K04448+K04999+K07604+K04958+K08045+K08041+K02649+K04345+K02161	Com_5124_pos;Com_18786_neg	C00951+C00575
Metabolism	Lipid metabolism	Linoleic acid metabolism	2	28	0.714125	0.939959	3	ko00591	ncbi_100126281(CYP3A46);ncbi_100524940(LOC100524940)	K07424+K07418	Com_18468_neg;Com_5_neg;Com_19_neg	C14766+C00219+C03242
Metabolism	Metabolism of cofactors and vitamins	Thiamine metabolism	1	14	0.720965	0.940921	5	ko00730	ncbi_100524699(TPK1)	K00949	Com_1937_pos;Com_6086_pos;Com_24643_pos;Com_71_neg;Com_4049_neg	C00378+C04294+C00003+C00082+C00003
Cellular Processes	Cell growth and death	Oocyte meiosis	8	112	0.770656	0.954387	1	ko04114	ncbi_397394(CAMK2G);ncbi_397582(AR);ncbi_100626014(CAMK2A);ncbi_397470(PPP2R1B);ncbi_397454(ITPR1);ncbi_100155970(ADCY5);ncbi_100624934(ADCY1);ncbi_100623628(PRKACB)	K04515+K08557+K04515+K03456+K04958+K08045+K08041+K04345	Com_18786_neg	C00575
Metabolism	Lipid metabolism	Primary bile acid biosynthesis	1	17	0.787809	0.954387	5	ko00120	ncbi_100738003(LOC100738003)	K07430	Com_16856_pos;Com_40620_pos;Com_20674_neg;Com_4463_neg;Com_3874_neg	C05122+C00187+C05466+C01921+C05465
Metabolism	Xenobiotics biodegradation and metabolism	Drug metabolism - cytochrome P450	3	47	0.789181	0.954387	1	ko00982	ncbi_100523701(AOX1);ncbi_397567(MGST1);ncbi_100526075(ALDH3A1)	K00157+K00799+K00129	Com_12270_pos	C16560
Organismal Systems	Endocrine system	Progesterone-mediated oocyte maturation	6	88	0.789877	0.954387	1	ko04914	ncbi_100521736(MAPK10);ncbi_100155970(ADCY5);ncbi_100624934(ADCY1);ncbi_100516060(PDE3B);ncbi_100739510(PIK3R2);ncbi_100623628(PRKACB)	K04440+K08045+K08041+K13296+K02649+K04345	Com_18786_neg	C00575
Metabolism	Xenobiotics biodegradation and metabolism	Drug metabolism - other enzymes	4	61	0.789969	0.954387	4	ko00983	ncbi_100157630(TPMT);ncbi_397567(MGST1);ncbi_100316853(RRM2);ncbi_100152763(NME7)	K00569+K00799+K10808+K00940	Com_27527_pos;Com_24643_pos;Com_4049_neg;Com_6221_neg	C07054+C00003+C00003+C16641
Human Diseases	Cancers	Chemical carcinogenesis	4	61	0.789969	0.954387	2	ko05204	ncbi_100126281(CYP3A46);ncbi_397567(MGST1);ncbi_100157176(KYAT3);ncbi_100526075(ALDH3A1)	K07424+K00799+K00816+K00129	Com_10405_pos;Com_11582_pos	C06800+C16453
Metabolism	Metabolism of cofactors and vitamins	Porphyrin and chlorophyll metabolism	2	33	0.795412	0.954387	4	ko00860	ncbi_396622(HMOX2);ncbi_406870(CP)	K21418+K13624	Com_4291_pos;Com_2085_pos;Com_308_neg;Com_14443_neg	C00188+C00931+C00025+C00486
Human Diseases	Neurodegenerative diseases	Prion diseases	2	33	0.795412	0.954387	2	ko05020	ncbi_100037951(C9);ncbi_100623628(PRKACB)	K04000+K04345	Com_18786_neg;Com_7286_neg	C00575+C02140
Metabolism	Lipid metabolism	Arachidonic acid metabolism	4	62	0.800483	0.955615	14	ko00590	ncbi_100154219(LTA4H);ncbi_100520063(LTC4S);ncbi_100524940(LOC100524940);ncbi_100518620(LOC100518620)	K01254+K00807+K07418+K07422	Com_14472_pos;Com_9468_pos;Com_2176_pos;Com_13965_pos;Com_1863_pos;Com_7312_pos;Com_7196_pos;Com_13476_pos;Com_2275_neg;Com_2258_neg;Com_11596_neg;Com_1951_neg;Com_4508_neg;Com_5_neg	C14732+C05957+C05954+C01312+C05950+C05951+C02166+C05952+C05965+C02165+C05953+C05356+C00696+C00219
Human Diseases	Infectious diseases	Leishmaniasis	4	66	0.838342	0.96017	1	ko05140	ncbi_396913(JUN);ncbi_397459(ITGAM);ncbi_100171389(PTPN6);ncbi_100628001(MARCKSL1)	K04448+K06461+K05697+K13536	Com_5_neg	C00219
Human Diseases	Endocrine and metabolic diseases	Insulin resistance	7	108	0.841569	0.96017	2	ko04931	ncbi_733702(CD36);ncbi_399527(CPT1A);ncbi_100157793(PRKAB2);ncbi_100512686(IRS1);ncbi_397308(SREBF1);ncbi_100521736(MAPK10);ncbi_100739510(PIK3R2)	K06259+K08765+K07199+K16172+K07197+K04440+K02649	Com_1010_pos;Com_11499_neg	C02571+C02571
Environmental Information Processing	Signal transduction	VEGF signaling pathway	3	55	0.86919	0.96017	1	ko04370	ncbi_100134969(NFATC2);ncbi_397184(PRKCA);ncbi_100739510(PIK3R2)	K17332+K02677+K02649	Com_13965_pos	C01312
Organismal Systems	Endocrine system	Prolactin signaling pathway	4	70	0.869995	0.96017	6	ko04917	ncbi_100307052(SOCS1);ncbi_100521736(MAPK10);ncbi_100738589(CCND1);ncbi_100739510(PIK3R2)	K04694+K04440+K04503+K02649	Com_33974_pos;Com_22_pos;Com_5124_pos;Com_43797_pos;Com_2319_pos;Com_71_neg	C00280+C03758+C00951+C00468+C00355+C00082
Metabolism	Metabolism of cofactors and vitamins	Retinol metabolism	3	57	0.884452	0.96017	1	ko00830	ncbi_100126281(CYP3A46);ncbi_100523701(AOX1);ncbi_100127136(RDH10)	K07424+K00157+K11151	Com_24341_neg	C16677
Metabolism	Metabolism of cofactors and vitamins	Folate biosynthesis	1	24	0.888051	0.96017	2	ko00790	ncbi_100153443(GPHN)	K15376	Com_7427_neg;Com_6974_neg	C00504+C00415
Organismal Systems	Excretory system	Endocrine and other factor-regulated calcium reabsorption	2	42	0.891555	0.96017	2	ko04961	ncbi_397184(PRKCA);ncbi_100623628(PRKACB)	K02677+K04345	Com_5124_pos;Com_18786_neg	C00951+C00575
Organismal Systems	Immune system	Chemokine signaling pathway	11	172	0.893965	0.96017	1	ko04062	ncbi_494019(CXCL10);ncbi_494460(CXCL12);ncbi_494467(CXCL14);ncbi_100157949(GNB5);ncbi_100155970(ADCY5);ncbi_100124654(CXCR2);ncbi_100515345(LOC100515345);ncbi_100624934(ADCY1);ncbi_100739510(PIK3R2);ncbi_100151826(VAV3);ncbi_100623628(PRKACB)	K12671+K10031+K10033+K04539+K08045+K05050+K04175+K08041+K02649+K05730+K04345	Com_18786_neg	C00575
Human Diseases	Infectious diseases	Chagas disease (American trypanosomiasis)	6	103	0.894848	0.96017	2	ko05142	ncbi_396913(JUN);ncbi_397089(PPP2R2B);ncbi_100521736(MAPK10);ncbi_397470(PPP2R1B);ncbi_100624934(ADCY1);ncbi_100739510(PIK3R2)	K04448+K04354+K04440+K03456+K08041+K02649	Com_18786_neg;Com_3253_neg	C00575+C00062
Human Diseases	Immune diseases	Asthma	1	25	0.897829	0.96017	3	ko05310	ncbi_397395(CD40)	K03160	Com_7312_pos;Com_7196_pos;Com_4508_neg	C05951+C02166+C00696
Metabolism	Energy metabolism	Oxidative phosphorylation	8	132	0.898666	0.96017	3	ko00190	ncbi_100157621(UQCRB);ncbi_396950(ATP5I);ncbi_100525371(NDUFA5);ncbi_100154525(ATP6V0A2);ncbi_808503(COX1);ncbi_808507(COX3);ncbi_808512(ND6);ncbi_808513(CYTB)	K00417+K02129+K03949+K02154+K02256+K02262+K03884+K00412	Com_24643_pos;Com_4049_neg;Com_5238_neg	C00003+C00003+C00122
Organismal Systems	Excretory system	Vasopressin-regulated water reabsorption	2	43	0.899151	0.96017	1	ko04962	ncbi_100513078(DYNC2LI1);ncbi_100623628(PRKACB)	K10417+K04345	Com_18786_neg	C00575
Genetic Information Processing	Translation	Aminoacyl-tRNA biosynthesis	2	44	0.906249	0.96017	11	ko00970	ncbi_100524650(FARSB);ncbi_100518457(RARS2)	K01890+K01887	Com_4291_pos;Com_17_pos;Com_225_pos;Com_10028_pos;Com_754_neg;Com_308_neg;Com_71_neg;Com_2837_neg;Com_3253_neg;Com_5515_neg;Com_6126_neg	C00188+C00079+C00073+C00047+C00135+C00025+C00082+C00049+C00062+C00078+C01005
Organismal Systems	Nervous system	Synaptic vesicle cycle	3	61	0.910292	0.96017	3	ko04721	ncbi_100512594(STX1A);ncbi_100513599(SYT1);ncbi_100154525(ATP6V0A2)	K04560+K15290+K02154	Com_6717_pos;Com_22_pos;Com_308_neg	C01996+C03758+C00025
Human Diseases	Infectious diseases	Salmonella infection	4	80	0.926749	0.97088	1	ko05132	ncbi_396913(JUN);ncbi_397208(CSF2);ncbi_100521736(MAPK10);ncbi_102158866(KLC3)	K04448+K05427+K04440+K10407	Com_3253_neg	C00062
Metabolism	Xenobiotics biodegradation and metabolism	Metabolism of xenobiotics by cytochrome P450	2	49	0.935238	0.973239	3	ko00980	ncbi_397567(MGST1);ncbi_100526075(ALDH3A1)	K00799+K00129	Com_10405_pos;Com_11582_pos;Com_5527_neg	C06800+C16453+C11713
Organismal Systems	Environmental adaptation	Circadian rhythm	1	30	0.93532	0.973239	1	ko04710	ncbi_100157793(PRKAB2)	K07199	Com_18786_neg	C00575
Organismal Systems	Sensory system	Taste transduction	3	67	0.939322	0.974112	11	ko04742	ncbi_503666(P2RY1);ncbi_100516701(SCN9A);ncbi_100623628(PRKACB)	K04270+K04841+K04345	Com_6717_pos;Com_27274_pos;Com_1543_pos;Com_140_pos;Com_31514_pos;Com_6944_pos;Com_489_neg;Com_308_neg;Com_28_neg;Com_18786_neg;Com_1305_neg	C01996+C00020+C00208+C00208+C06526+C00144+C00158+C00025+C02265+C00575+C00149
Human Diseases	Substance dependence	Nicotine addiction	1	38	0.968899	0.989653	2	ko05033	ncbi_100525792(GABRP)	K05189	Com_6717_pos;Com_308_neg	C01996+C00025
Human Diseases	Substance dependence	Alcoholism	7	147	0.9768	0.989653	6	ko05034	ncbi_100144487(DRD1);ncbi_100157949(GNB5);ncbi_100156170(HDAC2);ncbi_106510170(LOC106510170);ncbi_606745(ADORA2B);ncbi_100155970(ADCY5);ncbi_100523163(HDAC9)	K04144+K04539+K06067+K11251+K04267+K08045+K11409	Com_190_pos;Com_22_pos;Com_2319_pos;Com_308_neg;Com_71_neg;Com_18786_neg	C00212+C03758+C00355+C00025+C00082+C00575
Organismal Systems	Sensory system	Olfactory transduction	7	888	1	1	3	ko04740	ncbi_397394(CAMK2G);ncbi_100626014(CAMK2A);ncbi_100737701(PDE2A);ncbi_100514309(LOC100514309);ncbi_100523457(LOC100523457);ncbi_100622020(SLC8A1);ncbi_100623628(PRKACB)	K04515+K04515+K18283+K04257+K12321+K05849+K04345	Com_27274_pos;Com_6944_pos;Com_18786_neg	C00020+C00144+C00575

## Sheet: LN and LL
7.3 Integrated analysis of KEGG annotation in unique DEGs (excluding DEGs between normoxia and hypoxia groups) for LN and LL groups and all DAMs.
KEGG_A_class	KEGG_B_class	Pathway	Gene_LN-vs-LL (929)	Gene_All (7351)	Gene_Pvalue	Gene_Qvalue	Metabolites Count (240)	Pathway ID	Genes	K_IDs	Metabolites	C_IDs
Human Diseases	Neurodegenerative diseases	Huntington disease	42	190	0.000164361	0.00976865	1	ko05016	ncbi_574054(ATP5G1);ncbi_100037985(NDUFC1);ncbi_100038022(COX6B);ncbi_397279(TFAM);ncbi_448979(NDUFB8);ncbi_100271929(CLTC);ncbi_100157442(NDUFA6);ncbi_100154443(NDUFA8);ncbi_397036(SOD1);ncbi_100513030(NDUFC2);ncbi_100513629(ATP5G3);ncbi_100513895(NDUFB2);ncbi_100514033(NDUFA11);ncbi_397276(TP53);ncbi_100156879(LOC100156879);ncbi_100158185(SLC25A5);ncbi_100157156(ATP5B);ncbi_100152612(PPIF);ncbi…	K02128+K03967+K02267+K11830+K03964+K04646+K03950+K03952+K04565+K03968+K02128+K03958+K03956+K04451+K00414+K05863+K02133+K09565+K03941+K03942+K02273+K02134+K00420+K00413+K09222+K03954+K03939+K11351+K03013+K00418+K05625+K03963+K03014+K02084+K03957+K03935+K09047+K03015+K04644+K10408+K10408+K03966	Com_308_neg	C00025
Metabolism	Energy metabolism	Oxidative phosphorylation	31	132	0.00038334	0.0148544	3	ko00190	ncbi_574054(ATP5G1);ncbi_100037979(ATP5J2);ncbi_100037985(NDUFC1);ncbi_100038022(COX6B);ncbi_448979(NDUFB8);ncbi_100157442(NDUFA6);ncbi_100154443(NDUFA8);ncbi_100521863(COX10);ncbi_100513030(NDUFC2);ncbi_100513629(ATP5G3);ncbi_100513895(NDUFB2);ncbi_100514033(NDUFA11);ncbi_100156799(COX17);ncbi_100156879(LOC100156879);ncbi_100157156(ATP5B);ncbi_100521769(TCIRG1);ncbi_100521945(NDUFS8);ncbi_100522…	K02128+K02130+K03967+K02267+K03964+K03950+K03952+K02257+K03968+K02128+K03958+K03956+K02260+K00414+K02133+K02154+K03941+K03942+K02273+K02134+K00420+K00413+K03954+K03939+K11351+K00418+K03963+K03957+K02150+K03935+K03966	Com_24643_pos;Com_4049_neg;Com_5238_neg	C00003+C00003+C00122
Metabolism	Global and overview maps	Metabolic pathways	194	1254	0.000683627	0.0211924	158	ko01100	ncbi_396816(AKR1B1);ncbi_445512(HMOX1);ncbi_445537(ST3GAL1);ncbi_497050(AHCY);ncbi_574054(ATP5G1);ncbi_595123(NAMPT);ncbi_733602(CKMT2);ncbi_733667(AK4);ncbi_733685(ALDH2);ncbi_396581(HMBS);ncbi_100037303(SGMS1);ncbi_100037979(ATP5J2);ncbi_100037985(NDUFC1);ncbi_100038022(COX6B);ncbi_397561(FASN);ncbi_100127150(TKT);ncbi_396593(PLA2G7);ncbi_100101472(AMPD1);ncbi_100144529(PHGDH);ncbi_100126844(GA…	K00011+K00510+K00780+K01251+K02128+K03462+K00933+K00939+K00128+K01749+K04714+K02130+K03967+K02267+K00665+K00615+K01062+K01490+K00058+K00613+K00933+K00657+K13370+K00602+K01834+K00913+K01110+K00940+K03964+K03841+K07508+K00901+K01824+K13273+K03950+K03952+K15909+K00940+K00976+K14156+K01598+K08967+K09880+K00228+K00026+K00008+K00139+K00966+K01115+K02257+K03968+K02128+K03958+K03956+K00616+K01599+K00294+…	Com_4291_pos;Com_33974_pos;Com_170_pos;Com_1009_pos;Com_2489_pos;Com_17_pos;Com_25418_pos;Com_233_pos;Com_226_pos;Com_2801_pos;Com_136_pos;Com_196_pos;Com_225_pos;Com_169_pos;Com_3922_pos;Com_27274_pos;Com_156_pos;Com_62_pos;Com_99_pos;Com_1937_pos;Com_13748_pos;Com_190_pos;Com_1002_pos;Com_153_pos;Com_16856_pos;Com_22_pos;Com_5664_pos;Com_40620_pos;Com_19473_pos;Com_14326_pos;Com_6710_pos;Com_15…	C00188+C00280+C00294+C00791+C00475+C00079+C00535+C00114+C00153+C00380+C00750+C00300+C00073+C00314+C01717+C00020+C00864+C00262+C00954+C00378+C00437+C00212+C00170+C00147+C05122+C03758+C00385+C00187+C05579+C00624+C07215+C00208+C00315+C02046+C01157+C00141+C05957+C00208+C02504+C16356+C00329+C00951+C05954+C05512+C03406+C05589+C05635+C01598+C04294+C00468+C00993+C00606+C00003+C00051+C01953+C00559+C02480+…
Human Diseases	Substance dependence	Alcoholism	31	147	0.00251687	0.0487644	6	ko05034	ncbi_100141311(H2AFZ);ncbi_397378(PPP1CB);ncbi_100158121(LOC100158121);ncbi_100156937(LOC100156937);ncbi_100156127(LOC100156127);ncbi_100157763(LOC100157763);ncbi_100156321(SHC1);ncbi_100518251(KRAS);ncbi_100156932(LOC100156932);ncbi_100622387(LOC100622387);ncbi_100514612(BRAF);ncbi_102159655(LOC102159655);ncbi_100158117(LOC100158117);ncbi_100522202(GNG11);ncbi_100154071(LOC100154071);ncbi_100154…	K11251+K06269+K11251+K11252+K11252+K11251+K06279+K07827+K11252+K11251+K04365+K11251+K11254+K04546+K11251+K11251+K11252+K09047+K11253+K11252+K17448+K02833+K11252+K11251+K11252+K11254+K11251+K11252+K11252+K11252+K11253	Com_190_pos;Com_22_pos;Com_2319_pos;Com_308_neg;Com_71_neg;Com_18786_neg	C00212+C03758+C00355+C00025+C00082+C00575
Human Diseases	Neurodegenerative diseases	Parkinson disease	30	142	0.00284686	0.0519133	6	ko05012	ncbi_574054(ATP5G1);ncbi_100037985(NDUFC1);ncbi_100038022(COX6B);ncbi_448979(NDUFB8);ncbi_100157442(NDUFA6);ncbi_100154443(NDUFA8);ncbi_100513030(NDUFC2);ncbi_100513629(ATP5G3);ncbi_100513895(NDUFB2);ncbi_100514033(NDUFA11);ncbi_100156879(LOC100156879);ncbi_100158185(SLC25A5);ncbi_100157156(ATP5B);ncbi_100152612(PPIF);ncbi_100521945(NDUFS8);ncbi_100522783(NDUFV1);ncbi_100522725(LOC100522725);ncbi…	K02128+K03967+K02267+K03964+K03950+K03952+K03968+K02128+K03958+K03956+K00414+K05863+K02133+K09565+K03941+K03942+K02273+K02134+K00420+K00413+K04554+K03954+K03939+K11351+K00418+K03963+K02084+K03957+K03935+K03966	Com_27274_pos;Com_190_pos;Com_22_pos;Com_2319_pos;Com_71_neg;Com_18786_neg	C00020+C00212+C03758+C00355+C00082+C00575
Metabolism	Nucleotide metabolism	Pyrimidine metabolism	20	96	0.0155278	0.200568	11	ko00240	ncbi_100233195(NME4);ncbi_100142626(NME1);ncbi_397109(DPYD);ncbi_100525976(UCK1);ncbi_100523894(POLR3E);ncbi_100525752(POLD1);ncbi_100525292(CTPS1);ncbi_100526240(NT5C);ncbi_100623333(POLR2E);ncbi_100737214(POLR2F);ncbi_414414(POLR1C);ncbi_100513971(POLA2);ncbi_100620235(POLR2G);ncbi_110255958(TK1);ncbi_110256004(NT5C3B);ncbi_100155254(ENTPD4);ncbi_100620959(POLE);ncbi_110257191(DTYMK);ncbi_10062…	K00940+K00940+K00207+K00876+K14721+K02327+K01937+K01081+K03013+K03014+K03027+K02321+K03015+K00857+K01081+K12305+K02324+K00943+K01511+K03021	Com_2489_pos;Com_2801_pos;Com_1279_pos;Com_1170_neg;Com_53_neg;Com_2034_neg;Com_8134_neg;Com_19942_neg;Com_25688_neg;Com_1838_neg;Com_884_neg	C00475+C00380+C00105+C00214+C00299+C02170+C00112+C01346+C00364+C00106+C00055
Genetic Information Processing	Translation	Aminoacyl-tRNA biosynthesis	11	44	0.0183745	0.207868	11	ko00970	ncbi_100270813(VARS);ncbi_100513328(NARS);ncbi_100524304(FARSA);ncbi_100518652(HARS);ncbi_100524908(DARS);ncbi_100620180(TARS2);ncbi_100627457(QRSL1);ncbi_100515851(CARS2);ncbi_100526191(TARS);ncbi_100516312(CARS);ncbi_100624746(IARS)	K01873+K01893+K01889+K01892+K22503+K01868+K02433+K01883+K01868+K01883+K01870	Com_4291_pos;Com_17_pos;Com_225_pos;Com_10028_pos;Com_754_neg;Com_308_neg;Com_71_neg;Com_2837_neg;Com_3253_neg;Com_5515_neg;Com_6126_neg	C00188+C00079+C00073+C00047+C00135+C00025+C00082+C00049+C00062+C00078+C01005
Environmental Information Processing	Signal transduction	FoxO signaling pathway	25	130	0.0198835	0.212357	2	ko04068	ncbi_396665(TGFBR1);ncbi_100135668(CCNB2);ncbi_100174959(KLF2);ncbi_100156264(PTEN);ncbi_396632(BCL2L11);ncbi_397662(CCNB1);ncbi_100152997(GADD45G);ncbi_100155304(SMAD2);ncbi_100154715(CDK2);ncbi_397083(EGF);ncbi_397400(TGFB3);ncbi_397504(PRKAA2);ncbi_100518251(KRAS);ncbi_396609(MAPK9);ncbi_100286877(PRMT1);ncbi_100514612(BRAF);ncbi_100623707(PIK3R1);ncbi_100526210(HOMER3);ncbi_110255858(IRS2);nc…	K04674+K21770+K17845+K01110+K16341+K05868+K04402+K04500+K02206+K04357+K13377+K07198+K07827+K04440+K11434+K04365+K02649+K15010+K07187+K00922+K02833+K04527+K06631+K13304+K16332	Com_27274_pos;Com_308_neg	C00020+C00025
Organismal Systems	Endocrine system	Progesterone-mediated oocyte maturation	18	88	0.0249965	0.228356	1	ko04914	ncbi_574063(AURKA);ncbi_100135668(CCNB2);ncbi_100286809(PKMYT1);ncbi_397662(CCNB1);ncbi_100329127(CDC25B);ncbi_100415929(CCNA2);ncbi_100462674(CPEB2);ncbi_100623146(KIF22);ncbi_100523972(RPS6KA1);ncbi_100154715(CDK2);ncbi_397028(HSP90AA1);ncbi_100518251(KRAS);ncbi_396609(MAPK9);ncbi_100736650(MAD2L2);ncbi_100514612(BRAF);ncbi_100623707(PIK3R1);ncbi_100622559(PIK3CB);ncbi_396953(PLK1)	K11481+K21770+K06633+K05868+K05866+K06627+K02602+K10403+K04373+K02206+K04079+K07827+K04440+K13728+K04365+K02649+K00922+K06631	Com_18786_neg	C00575
Metabolism	Lipid metabolism	Steroid biosynthesis	6	19	0.0253866	0.228356	1	ko00100	ncbi_100312968(EBP);ncbi_100520925(SC5D);ncbi_100628166(SOAT1);ncbi_100124375(CYP2R1);ncbi_100625138(LSS);ncbi_100627707(DHCR7)	K01824+K00227+K00637+K07419+K01852+K00213	Com_40620_pos	C00187
Organismal Systems	Endocrine system	Insulin signaling pathway	25	135	0.0304975	0.248796	1	ko04910	ncbi_397561(FASN);ncbi_100310801(PHKG2);ncbi_100134828(FBP2);ncbi_100462718(INPPL1);ncbi_397548(PHKG1);ncbi_397378(PPP1CB);ncbi_397504(PRKAA2);ncbi_100156321(SHC1);ncbi_733659(PYGM);ncbi_100518251(KRAS);ncbi_100518854(CBL);ncbi_396609(MAPK9);ncbi_100621690(CBLB);ncbi_100518588(PPP1R3A);ncbi_100514612(BRAF);ncbi_100523840(RHOQ);ncbi_100623707(PIK3R1);ncbi_106504470(PPP1R3E);ncbi_110255858(IRS2);nc…	K00665+K00871+K03841+K15909+K00871+K06269+K07198+K06279+K00688+K07827+K04707+K04440+K22517+K07189+K04365+K07194+K02649+K07189+K07187+K00922+K06069+K17448+K00688+K02833+K04527	Com_18786_neg	C00575
Human Diseases	Cancers	Renal cell carcinoma	14	68	0.0425055	0.313213	2	ko05211	ncbi_654328(MET);ncbi_100302363(ETS1);ncbi_397400(TGFB3);ncbi_100519651(ELOB);ncbi_100518251(KRAS);ncbi_100627936(PAK4);ncbi_100514612(BRAF);ncbi_100623707(PIK3R1);ncbi_100523673(EGLN2);ncbi_100512186(CUL2);ncbi_100622559(PIK3CB);ncbi_100511837(PAK2);ncbi_100153461(EGLN1);ncbi_110259208(HRAS)	K05099+K02678+K13377+K03873+K07827+K05734+K04365+K02649+K09592+K03870+K00922+K04410+K09592+K02833	Com_1305_neg;Com_5238_neg	C00149+C00122
Metabolism	Metabolism of cofactors and vitamins	Porphyrin and chlorophyll metabolism	8	33	0.0488732	0.322355	4	ko00860	ncbi_445512(HMOX1);ncbi_396581(HMBS);ncbi_100511474(CPOX);ncbi_100521863(COX10);ncbi_100514239(UROD);ncbi_110255665(FXN);ncbi_100621486(ALAD);MSTRG.42200(Alas1)	K00510+K01749+K00228+K02257+K01599+K19054+K01698+K00643	Com_4291_pos;Com_2085_pos;Com_308_neg;Com_14443_neg	C00188+C00931+C00025+C00486
Metabolism	Carbohydrate metabolism	Pentose phosphate pathway	7	28	0.0548407	0.354179	2	ko00030	ncbi_100127150(TKT);ncbi_100134828(FBP2);ncbi_100514210(TALDO1);ncbi_100517636(PGLS);ncbi_397546(PGD);ncbi_100622986(G6PD);ncbi_100624724(TKTL2)	K00615+K03841+K00616+K01057+K00033+K00036+K00615	Com_711_neg;Com_2688_neg	C00199+C05382
Human Diseases	Neurodegenerative diseases	Amyotrophic lateral sclerosis (ALS)	10	48	0.0737992	0.410445	2	ko05014	ncbi_414913(CCS);ncbi_100144499(RAB5A);ncbi_397036(SOD1);ncbi_102165927(TOMM40);ncbi_397276(TP53);ncbi_397241(PPP3CA);ncbi_396603(PPP3CB);ncbi_100513283(APAF1);ncbi_110256149(MAP2K3);ncbi_100622769(MAP3K5)	K04569+K07887+K04565+K11518+K04451+K04348+K04348+K02084+K04432+K04426	Com_308_neg;Com_3253_neg	C00025+C00062
Metabolism	Carbohydrate metabolism	Amino sugar and nucleotide sugar metabolism	10	49	0.0827363	0.434716	4	ko00520	ncbi_100513664(FPGT);ncbi_100513376(GMPPB);ncbi_397040(UGP2);ncbi_397141(NPL);ncbi_100521514(GALK1);ncbi_100621392(GALE);ncbi_100623908(GALT);ncbi_100518775(AMDHD2);ncbi_110258063(UAP1L1);ncbi_100620054(TSTA3)	K00976+K00966+K00963+K01639+K00849+K01784+K00965+K01443+K00972+K02377	Com_38009_pos;Com_1597_pos;Com_4817_neg;Com_6759_neg	C00329+C00270+C00167+C00259
Human Diseases	Cancers	Pathways in cancer	74	503	0.0855554	0.442036	10	ko05200	ncbi_445512(HMOX1);ncbi_595129(FADD);ncbi_654328(MET);ncbi_396665(TGFBR1);ncbi_780426(CCND3);ncbi_397285(ITGAV);ncbi_100037300(XIAP);ncbi_100113425(BMP4);ncbi_396629(TRAF6);ncbi_100141309(RAD51);ncbi_100188978(APPL1);ncbi_100156264(PTEN);ncbi_396632(BCL2L11);ncbi_100302363(ETS1);ncbi_100152997(GADD45G);ncbi_100337669(FZD2);ncbi_100157103(BMP2);ncbi_100156184(NCOA4);ncbi_100155110(CKS1B);ncbi_1001…	K00510+K02373+K05099+K04674+K10152+K06487+K04725+K04662+K03175+K04482+K08733+K01110+K16341+K02678+K04402+K02235+K21283+K09289+K02219+K08803+K04500+K02206+K06618+K02376+K11220+K05130+K04189+K04358+K04451+K05719+K04079+K04357+K00799+K04447+K08731+K01398+K13377+K05461+K00799+K14021+K09288+K04350+K22603+K01064+K03873+K07827+K00799+K04707+K04166+K02219+K06226+K04440+K04639+K02084+K03173+K04365+K04546+…	Com_33974_pos;Com_25418_pos;Com_40620_pos;Com_5124_pos;Com_8549_pos;Com_20746_pos;Com_1105_pos;Com_18786_neg;Com_1305_neg;Com_5238_neg	C00280+C00535+C00187+C00951+C00735+C00735+C00762+C00575+C00149+C00122
Environmental Information Processing	Signal transduction	Hedgehog signaling pathway	9	44	0.0956497	0.467786	1	ko04340	ncbi_100156406(SPOPL);ncbi_100515110(SMO);ncbi_100626085(BOC);ncbi_100516459(GAS1);ncbi_100627676(SMURF2);ncbi_100170767(ARRB2);ncbi_100525276(CSNK1G2);ncbi_100511866(CSNK1G3);ncbi_100620576(EVC)	K10523+K06226+K20020+K06232+K04678+K04439+K08958+K08958+K19605	Com_18786_neg	C00575
Metabolism	Carbohydrate metabolism	Fructose and mannose metabolism	7	32	0.100467	0.467786	2	ko00051	ncbi_396816(AKR1B1);ncbi_100134828(FBP2);ncbi_100513664(FPGT);ncbi_100158181(SORD);ncbi_100513376(GMPPB);ncbi_100523241(KHK);ncbi_100620054(TSTA3)	K00011+K03841+K00976+K00008+K00966+K00846+K02377	Com_5747_neg;Com_999_neg	C00111+C00392
Environmental Information Processing	Signal transduction	MAPK signaling pathway	44	288	0.101429	0.467786	1	ko04010	ncbi_494463(STMN1);ncbi_654328(MET);ncbi_396665(TGFBR1);ncbi_396629(TRAF6);ncbi_100135663(MAP3K7);ncbi_100240743(DDIT3);ncbi_100329127(CDC25B);ncbi_100152997(GADD45G);ncbi_100523972(RPS6KA1);ncbi_396717(FGF9);ncbi_397276(TP53);ncbi_397083(EGF);ncbi_397241(PPP3CA);ncbi_397400(TGFB3);ncbi_397509(KITLG);ncbi_396603(PPP3CB);ncbi_100522721(RASGRP1);ncbi_100518950(FGF19);ncbi_100523716(MAP4K2);ncbi_100…	K04381+K05099+K04674+K03175+K04427+K04452+K05866+K04402+K04373+K04358+K04451+K04357+K04348+K13377+K05461+K04348+K04350+K22603+K04414+K04461+K04423+K07827+K04416+K04440+K04352+K03173+K04365+K04378+K05467+K04405+K04457+K04857+K04439+K04464+K04432+K08053+K04422+K04410+K04426+K04358+K02833+K04527+K04435+K05094	Com_18786_neg	C00575
Human Diseases	Infectious diseases	HTLV-I infection	39	252	0.101845	0.467786	1	ko05166	ncbi_396665(TGFBR1);ncbi_780426(CCND3);ncbi_100037300(XIAP);ncbi_100135040(SLA-DRA);ncbi_100135050(SLA-DMB);ncbi_100135668(CCNB2);ncbi_397379(CDC20);ncbi_100302363(ETS1);ncbi_100151896(RANBP1);ncbi_100337669(FZD2);ncbi_100519184(CANX);ncbi_100157175(MYBL2);ncbi_100155304(SMAD2);ncbi_100151828(RB1);ncbi_100157360(FZD6);ncbi_397276(TP53);ncbi_396925(VCAM1);ncbi_397241(PPP3CA);ncbi_397400(TGFB3);ncb…	K04674+K10152+K04725+K06752+K06752+K21770+K03363+K02678+K15306+K02235+K08054+K21769+K04500+K06618+K02376+K04451+K06527+K04348+K13377+K05863+K04348+K01064+K07827+K02327+K06622+K06062+K04416+K06635+K04378+K12076+K02375+K02649+K00922+K02324+K17454+K02833+K09063+K09053+K09389	Com_18786_neg	C00575
Human Diseases	Cancers	Central carbon metabolism in cancer	11	59	0.118343	0.52409	12	ko05230	ncbi_654328(MET);ncbi_100188980(PGAM2);ncbi_100156264(PTEN);ncbi_397276(TP53);ncbi_100518251(KRAS);ncbi_100622986(G6PD);ncbi_100623707(PIK3R1);ncbi_100622559(PIK3CB);ncbi_399525(GLS);ncbi_110259208(HRAS);ncbi_100514115(FGFR3)	K05099+K01834+K01110+K04451+K07827+K00036+K02649+K00922+K01425+K02833+K05094	Com_17_pos;Com_225_pos;Com_489_neg;Com_754_neg;Com_308_neg;Com_71_neg;Com_2837_neg;Com_3253_neg;Com_2068_neg;Com_5515_neg;Com_1305_neg;Com_5238_neg	C00079+C00073+C00158+C00135+C00025+C00082+C00049+C00062+C00074+C00078+C00149+C00122
Human Diseases	Endocrine and metabolic diseases	Insulin resistance	18	108	0.13193	0.568031	2	ko04931	ncbi_664652(OGT);ncbi_397553(NR1H3);ncbi_100156264(PTEN);ncbi_100523972(RPS6KA1);ncbi_397378(PPP1CB);ncbi_397504(PRKAA2);ncbi_100157517(PTPA);ncbi_733659(PYGM);ncbi_396609(MAPK9);ncbi_100518588(PPP1R3A);ncbi_100152585(MGEA5);ncbi_100623707(PIK3R1);ncbi_106504470(PPP1R3E);ncbi_100515635(CREB5);ncbi_110255858(IRS2);ncbi_100622559(PIK3CB);ncbi_100621536(PYGB);ncbi_396755(INSR)	K09667+K08536+K01110+K04373+K06269+K07198+K17605+K00688+K04440+K07189+K15719+K02649+K07189+K09047+K07187+K00922+K00688+K04527	Com_1010_pos;Com_11499_neg	C02571+C02571
Metabolism	Carbohydrate metabolism	Pentose and glucuronate interconversions	5	22	0.135641	0.57601	5	ko00040	ncbi_396816(AKR1B1);ncbi_100158181(SORD);ncbi_396924(AKR1A1);ncbi_397040(UGP2);ncbi_397337(DHDH)	K00011+K00008+K00002+K00963+K00078	Com_4817_neg;Com_711_neg;Com_6759_neg;Com_5747_neg;Com_13620_neg	C00167+C00199+C00259+C00111+C00379
Environmental Information Processing	Signal transduction	Sphingolipid signaling pathway	19	116	0.14046	0.588414	1	ko04071	ncbi_100037303(SGMS1);ncbi_100101925(PPP2R5A);ncbi_100156264(PTEN);ncbi_397090(PPP2R2A);ncbi_100525377(PPP2R5E);ncbi_100519446(PLD1);ncbi_397276(TP53);ncbi_100518251(KRAS);ncbi_100512932(ASAH1);ncbi_396609(MAPK9);ncbi_100522824(GNA13);ncbi_100513840(TRAF2);ncbi_100623707(PIK3R1);ncbi_100518796(SGMS2);ncbi_100518980(SMPD1);ncbi_102160080(PPP2R3A);ncbi_100622559(PIK3CB);ncbi_100622769(MAP3K5);ncbi_…	K04714+K11584+K01110+K04354+K11584+K01115+K04451+K07827+K12348+K04440+K04639+K03173+K02649+K04714+K12350+K11583+K00922+K04426+K02833	Com_190_pos	C00212
Cellular Processes	Cell growth and death	Oocyte meiosis	18	112	0.167767	0.64321	1	ko04114	ncbi_574063(AURKA);ncbi_100101925(PPP2R5A);ncbi_100135668(CCNB2);ncbi_397379(CDC20);ncbi_100286809(PKMYT1);ncbi_397662(CCNB1);ncbi_100462674(CPEB2);ncbi_100523972(RPS6KA1);ncbi_100525377(PPP2R5E);ncbi_100154715(CDK2);ncbi_397241(PPP3CA);ncbi_397378(PPP1CB);ncbi_396603(PPP3CB);ncbi_397015(PTTG1);ncbi_100736650(MAD2L2);ncbi_100152822(REC8);ncbi_100153121(ESPL1);ncbi_396953(PLK1)	K11481+K11584+K21770+K03363+K06633+K05868+K02602+K04373+K11584+K02206+K04348+K06269+K04348+K06635+K13728+K13054+K02365+K06631	Com_18786_neg	C00575
Metabolism	Carbohydrate metabolism	Glyoxylate and dicarboxylate metabolism	6	30	0.170139	0.64321	5	ko00630	ncbi_397039(MDH2);ncbi_100158147(PCCB);ncbi_399535(MUT);ncbi_100154828(ACSS1);ncbi_100154014(GRHPR);ncbi_100626911(SHMT2)	K00026+K01966+K01847+K01895+K00049+K00600	Com_489_neg;Com_308_neg;Com_6714_neg;Com_11743_neg;Com_1305_neg	C00158+C00025+C01182+C00417+C00149
Metabolism	Amino acid metabolism	Valine, leucine and isoleucine degradation	9	50	0.173266	0.645508	2	ko00280	ncbi_733685(ALDH2);ncbi_100312959(ACAA2);ncbi_396932(ACADS);ncbi_100158147(PCCB);ncbi_399535(MUT);ncbi_100155020(AUH);ncbi_100524293(HSD17B10);ncbi_100153301(ALDH6A1);ncbi_100518784(BCAT1)	K00128+K07508+K00248+K01966+K01847+K05607+K08683+K00140+K00826	Com_1934_pos;Com_2034_neg	C00141+C02170
Metabolism	Lipid metabolism	Biosynthesis of unsaturated fatty acids	5	24	0.178273	0.649702	11	ko01040	ncbi_100158115(LOC100158115);ncbi_100514773(ACOT7);ncbi_100312978(PECR);ncbi_110255331(LOC110255331);ncbi_110255332(LOC110255332)	K01068+K17360+K07753+K01068+K01068	Com_869_pos;Com_77_pos;Com_353_neg;Com_11_neg;Com_8_neg;Com_46_neg;Com_588_neg;Com_810_neg;Com_331_neg;Com_5_neg;Com_19_neg	C06428+C16513+C08323+C16527+C06429+C06428+C16533+C08281+C08316+C00219+C03242
Metabolism	Carbohydrate metabolism	Galactose metabolism	6	31	0.18996	0.654057	4	ko00052	ncbi_396816(AKR1B1);ncbi_397040(UGP2);ncbi_100521514(GALK1);ncbi_100621392(GALE);ncbi_100623908(GALT);ncbi_100624593(GLB1)	K00011+K00963+K00849+K01784+K00965+K12309	Com_617_pos;Com_992_neg;Com_5747_neg;Com_3294_neg	C00492+C00137+C00111+C02262
Human Diseases	Infectious diseases	Leishmaniasis	11	66	0.20594	0.675116	1	ko05140	ncbi_396629(TRAF6);ncbi_100135040(SLA-DRA);ncbi_100135050(SLA-DMB);ncbi_100135663(MAP3K7);ncbi_100142665(NCF2);ncbi_396655(STAT1);ncbi_397019(ITGB1);ncbi_397108(GP91-PHOX);ncbi_397201(JAK2);ncbi_397400(TGFB3);ncbi_100621111(NFKBIB)	K03175+K06752+K06752+K04427+K08010+K11220+K05719+K21421+K04447+K13377+K02581	Com_5_neg	C00219
Organismal Systems	Nervous system	Retrograde endocannabinoid signaling	22	145	0.208185	0.675116	4	ko04723	ncbi_100037985(NDUFC1);ncbi_448979(NDUFB8);ncbi_100157442(NDUFA6);ncbi_100154443(NDUFA8);ncbi_100513030(NDUFC2);ncbi_100513895(NDUFB2);ncbi_100514033(NDUFA11);ncbi_396949(FAAH);ncbi_100521945(NDUFS8);ncbi_100522783(NDUFV1);ncbi_100521478(NDUFA10);ncbi_100520115(NDUFS6);ncbi_100522775(NDUFB11);ncbi_100519996(GRIA3);ncbi_396609(MAPK9);ncbi_100737726(NDUFB7);ncbi_100739619(NDUFB1);ncbi_100156075(NDU…	K03967+K03964+K03950+K03952+K03968+K03958+K03956+K15528+K03941+K03942+K03954+K03939+K11351+K05199+K04440+K03963+K03957+K03935+K04546+K04857+K03966+K05186	Com_308_neg;Com_18786_neg;Com_18846_neg;Com_5_neg	C00025+C00575+C00689+C00219
Environmental Information Processing	Signal transduction	Ras signaling pathway	33	226	0.209068	0.675116	1	ko04014	ncbi_654328(MET);ncbi_100125828(TBK1);ncbi_100144499(RAB5A);ncbi_100302363(ETS1);ncbi_100151794(RGL2);ncbi_100519446(PLD1);ncbi_396717(FGF9);ncbi_397083(EGF);ncbi_397509(KITLG);ncbi_100155918(SHOC2);ncbi_100156321(SHC1);ncbi_100522721(RASGRP1);ncbi_100518950(FGF19);ncbi_100518251(KRAS);ncbi_396609(MAPK9);ncbi_100627579(RASA1);ncbi_100627936(PAK4);ncbi_100627019(ABL2);ncbi_100624152(RASA4B);ncbi_1…	K05099+K05410+K07887+K02678+K17636+K01115+K04358+K04357+K05461+K19613+K06279+K04350+K22603+K07827+K04440+K04352+K05734+K08887+K17630+K09254+K04546+K02649+K05467+K00922+K08053+K04410+K10632+K05860+K17448+K04358+K02833+K04527+K05094	Com_18786_neg	C00575
Organismal Systems	Digestive system	Mineral absorption	7	39	0.216002	0.690315	4	ko04978	ncbi_445512(HMOX1);ncbi_100312962(ATOX1);ncbi_397035(FTL);ncbi_397030(FTH1);ncbi_100737517(SLC40A1);ncbi_397147(CLCN2);ncbi_100157775(TRPM6)	K00510+K07213+K13625+K00522+K14685+K05011+K04981	Com_4291_pos;Com_17_pos;Com_225_pos;Com_5515_neg	C00188+C00079+C00073+C00078
Metabolism	Global and overview maps	Carbon metabolism	17	110	0.221592	0.693874	12	ko01200	ncbi_100127150(TKT);ncbi_100144529(PHGDH);ncbi_100188980(PGAM2);ncbi_100134828(FBP2);ncbi_397039(MDH2);ncbi_100514210(TALDO1);ncbi_396932(ACADS);ncbi_100158147(PCCB);ncbi_397630(PC);ncbi_399535(MUT);ncbi_100154828(ACSS1);ncbi_100517636(PGLS);ncbi_397546(PGD);ncbi_100622986(G6PD);ncbi_100153301(ALDH6A1);ncbi_100624724(TKTL2);ncbi_100626911(SHMT2)	K00615+K00058+K01834+K03841+K00026+K00616+K00248+K01966+K01958+K01847+K01895+K01057+K00033+K00036+K00140+K00615+K00600	Com_489_neg;Com_711_neg;Com_2688_neg;Com_308_neg;Com_6714_neg;Com_5747_neg;Com_2837_neg;Com_2068_neg;Com_6126_neg;Com_17664_neg;Com_1305_neg;Com_5238_neg	C00158+C00199+C05382+C00025+C01182+C00111+C00049+C00074+C01005+C00440+C00149+C00122
Metabolism	Amino acid metabolism	Glycine, serine and threonine metabolism	7	40	0.235478	0.701376	6	ko00260	ncbi_100144529(PHGDH);ncbi_100126844(GATM);ncbi_100188980(PGAM2);ncbi_100154014(GRHPR);ncbi_100520329(LOC100520329);ncbi_100626911(SHMT2);MSTRG.42200(Alas1)	K00058+K00613+K01834+K00049+K00276+K00600+K00643	Com_4291_pos;Com_233_pos;Com_196_pos;Com_2837_neg;Com_5515_neg;Com_6126_neg	C00188+C00114+C00300+C00049+C00078+C01005
Organismal Systems	Aging	Longevity regulating pathway - multiple species	10	61	0.23638	0.701376	1	ko04213	ncbi_397036(SOD1);ncbi_397504(PRKAA2);ncbi_100518251(KRAS);ncbi_100523927(EIF4EBP2);ncbi_100623707(PIK3R1);ncbi_110255858(IRS2);ncbi_100622559(PIK3CB);ncbi_110259208(HRAS);ncbi_396755(INSR);ncbi_100739102(ATG5)	K04565+K07198+K07827+K18644+K02649+K07187+K00922+K02833+K04527+K08339	Com_18786_neg	C00575
Environmental Information Processing	Signal transduction	mTOR signaling pathway	22	148	0.237563	0.701376	1	ko04150	ncbi_100156264(PTEN);ncbi_100337669(FZD2);ncbi_100523972(RPS6KA1);ncbi_100156654(RRAGD);ncbi_100156749(LAMTOR2);ncbi_100155834(RNF152);ncbi_100157360(FZD6);ncbi_397504(PRKAA2);ncbi_100512949(WNT9A);ncbi_100518251(KRAS);ncbi_100511661(STRADB);ncbi_100144589(SLC3A2);ncbi_100519575(RICTOR);ncbi_100514612(BRAF);ncbi_100736975(ATP6V1E2);ncbi_100519058(FZD5);ncbi_100623707(PIK3R1);ncbi_100622559(PIK3CB…	K01110+K02235+K04373+K16186+K20398+K15705+K02376+K07198+K01064+K07827+K17532+K06519+K08267+K04365+K02150+K02375+K02649+K00922+K02833+K04527+K20400+K20409	Com_27274_pos	C00020
Metabolism	Nucleotide metabolism	Purine metabolism	25	171	0.24572	0.718615	18	ko00230	ncbi_733667(AK4);ncbi_100101472(AMPD1);ncbi_100170854(ATIC);ncbi_100233195(NME4);ncbi_100142626(NME1);ncbi_100738210(ENPP4);ncbi_100154573(GMPR);ncbi_100521423(AK1);ncbi_100523894(POLR3E);ncbi_100525752(POLD1);ncbi_100526240(NT5C);ncbi_106504175(AK6);ncbi_100623333(POLR2E);ncbi_100622001(APRT);ncbi_100737214(POLR2F);ncbi_414414(POLR1C);ncbi_100513971(POLA2);ncbi_100620235(POLR2G);ncbi_110256004(N…	K00939+K01490+K00602+K00940+K00940+K18424+K00364+K00939+K14721+K02327+K01081+K18532+K03013+K00759+K03014+K03027+K02321+K03015+K01081+K12305+K02324+K01511+K01488+K01490+K03021	Com_170_pos;Com_27274_pos;Com_62_pos;Com_190_pos;Com_153_pos;Com_5664_pos;Com_13518_pos;Com_6464_pos;Com_6944_pos;Com_10338_neg;Com_3197_neg;Com_559_neg;Com_79_neg;Com_18786_neg;Com_20606_neg;Com_850_neg;Com_8887_neg;Com_8323_neg	C00294+C00020+C00262+C00212+C00147+C00385+C05512+C00559+C00144+C05512+C00366+C00242+C00387+C00575+C00301+C00385+C01762+C04677
Genetic Information Processing	Folding, sorting and degradation	Sulfur relay system	2	8	0.268001	0.741804	2	ko04122	ncbi_100154341(URM1);ncbi_110260881(CTU2)	K12161+K14169	Com_1937_pos;Com_37822_pos	C00378+C00019
Human Diseases	Cancers	Basal cell carcinoma	10	63	0.268851	0.741804	1	ko05217	ncbi_100113425(BMP4);ncbi_100152997(GADD45G);ncbi_100337669(FZD2);ncbi_100157103(BMP2);ncbi_100157360(FZD6);ncbi_397276(TP53);ncbi_397543(BAK1);ncbi_100512949(WNT9A);ncbi_100515110(SMO);ncbi_100519058(FZD5)	K04662+K04402+K02235+K21283+K02376+K04451+K14021+K01064+K06226+K02375	Com_40620_pos	C00187
Metabolism	Metabolism of terpenoids and polyketides	Terpenoid backbone biosynthesis	4	21	0.269938	0.741804	2	ko00900	ncbi_100152301(PMVK);ncbi_100152230(MVK);ncbi_100514361(PDSS1);ncbi_110260885(MVD)	K13273+K00869+K12504+K01597	Com_2224_neg;Com_14600_neg	C00353+C00418
Human Diseases	Cancers	Prostate cancer	14	93	0.282607	0.746953	6	ko05215	ncbi_100156264(PTEN);ncbi_100154715(CDK2);ncbi_100151828(RB1);ncbi_397276(TP53);ncbi_397028(HSP90AA1);ncbi_397083(EGF);ncbi_100518251(KRAS);ncbi_100514612(BRAF);ncbi_100623707(PIK3R1);ncbi_100515635(CREB5);ncbi_100622559(PIK3CB);ncbi_100153846(E2F1);ncbi_110259208(HRAS);ncbi_110261113(E2F2)	K01110+K02206+K06618+K04451+K04079+K04357+K07827+K04365+K02649+K09047+K00922+K17454+K02833+K09389	Com_33974_pos;Com_25418_pos;Com_5124_pos;Com_8549_pos;Com_20746_pos;Com_1105_pos	C00280+C00535+C00951+C00735+C00735+C00762
Organismal Systems	Environmental adaptation	Circadian rhythm	5	30	0.327181	0.824603	1	ko04710	ncbi_397504(PRKAA2);ncbi_100156637(RORA);ncbi_100152980(FBXL3);ncbi_100620648(PER1);ncbi_100517750(CRY2)	K07198+K08532+K10269+K21944+K02295	Com_18786_neg	C00575
Metabolism	Amino acid metabolism	Cysteine and methionine metabolism	7	45	0.339589	0.848973	8	ko00270	ncbi_497050(AHCY);ncbi_100626434(ADI1);ncbi_100511394(ENOPH1);ncbi_397039(MDH2);ncbi_397300(MTR);ncbi_414385(SRM);ncbi_100518784(BCAT1)	K01251+K08967+K09880+K00026+K00548+K00797+K00826	Com_225_pos;Com_1002_pos;Com_4549_pos;Com_28093_pos;Com_27705_pos;Com_37822_pos;Com_2837_neg;Com_6126_neg	C00073+C00170+C00606+C00051+C01817+C00019+C00049+C01005
Metabolism	Metabolism of other amino acids	beta-Alanine metabolism	5	31	0.35357	0.863044	7	ko00410	ncbi_733685(ALDH2);ncbi_397109(DPYD);ncbi_414385(SRM);ncbi_100153301(ALDH6A1);ncbi_100520329(LOC100520329)	K00128+K00207+K00797+K00140+K00276	Com_136_pos;Com_156_pos;Com_92_pos;Com_754_neg;Com_2837_neg;Com_1838_neg;Com_3976_neg	C00750+C00864+C00315+C00135+C00049+C00106+C00386
Metabolism	Xenobiotics biodegradation and metabolism	Drug metabolism - other enzymes	9	61	0.363607	0.873784	4	ko00983	ncbi_100233195(NME4);ncbi_100142626(NME1);ncbi_397109(DPYD);ncbi_397117(GSTO1);ncbi_397682(GSTA1);ncbi_100525976(UCK1);ncbi_100510917(LOC100510917);ncbi_110255958(TK1);MSTRG.59841(CES1)	K00940+K00940+K00207+K00799+K00799+K00876+K00799+K00857+K01044	Com_27527_pos;Com_24643_pos;Com_4049_neg;Com_6221_neg	C07054+C00003+C00003+C16641
Metabolism	Global and overview maps	Biosynthesis of amino acids	10	69	0.372717	0.882002	26	ko01230	ncbi_100127150(TKT);ncbi_100144529(PHGDH);ncbi_100188980(PGAM2);ncbi_100514210(TALDO1);ncbi_396930(ACY1);ncbi_397630(PC);ncbi_397300(MTR);ncbi_100624724(TKTL2);ncbi_100626911(SHMT2);ncbi_100518784(BCAT1)	K00615+K00058+K01834+K00616+K14677+K01958+K00548+K00615+K00600+K00826	Com_4291_pos;Com_17_pos;Com_225_pos;Com_13748_pos;Com_14326_pos;Com_1934_pos;Com_2463_pos;Com_38082_pos;Com_37822_pos;Com_33595_pos;Com_10028_pos;Com_489_neg;Com_711_neg;Com_2688_neg;Com_754_neg;Com_308_neg;Com_71_neg;Com_11095_neg;Com_5747_neg;Com_4434_neg;Com_2837_neg;Com_3253_neg;Com_2068_neg;Com_5515_neg;Com_6126_neg;Com_3341_neg	C00188+C00079+C00073+C00437+C00624+C00141+C02504+C03406+C00019+C00666+C00047+C00158+C00199+C05382+C00135+C00025+C00082+C00449+C00111+C01179+C00049+C00062+C00074+C00078+C01005+C00166
Environmental Information Processing	Membrane transport	ABC transporters	7	47	0.382992	0.884354	20	ko02010	ncbi_733649(TAP1);ncbi_733650(TAP2);ncbi_396910(ABCB1);ncbi_100152112(ABCA1);ncbi_100626423(ABCB8);ncbi_100152428(LOC100152428);ncbi_100620416(ABCG1)	K05653+K05654+K05658+K05641+K05655+K05670+K05679	Com_4291_pos;Com_17_pos;Com_233_pos;Com_1937_pos;Com_617_pos;Com_1543_pos;Com_92_pos;Com_140_pos;Com_28093_pos;Com_22196_pos;Com_10028_pos;Com_754_neg;Com_308_neg;Com_992_neg;Com_6759_neg;Com_2837_neg;Com_3253_neg;Com_13620_neg;Com_98_neg;Com_999_neg	C00188+C00079+C00114+C00378+C00492+C00208+C00315+C00208+C00051+C04137+C00047+C00135+C00025+C00137+C00259+C00049+C00062+C00379+C01835+C00392
Organismal Systems	Endocrine system	Prolactin signaling pathway	10	70	0.390559	0.890245	6	ko04917	ncbi_396655(STAT1);ncbi_397201(JAK2);ncbi_100156321(SHC1);ncbi_100518251(KRAS);ncbi_396609(MAPK9);ncbi_100623908(GALT);ncbi_100623707(PIK3R1);ncbi_100622559(PIK3CB);ncbi_102164918(SHC3);ncbi_110259208(HRAS)	K11220+K04447+K06279+K07827+K04440+K00965+K02649+K00922+K17448+K02833	Com_33974_pos;Com_22_pos;Com_5124_pos;Com_43797_pos;Com_2319_pos;Com_71_neg	C00280+C03758+C00951+C00468+C00355+C00082
Metabolism	Metabolism of cofactors and vitamins	One carbon pool by folate	3	18	0.402061	0.900061	3	ko00670	ncbi_100170854(ATIC);ncbi_397300(MTR);ncbi_100626911(SHMT2)	K00602+K00548+K00600	Com_17664_neg;Com_7427_neg;Com_6974_neg	C00440+C00504+C00415
Metabolism	Amino acid metabolism	Arginine and proline metabolism	7	48	0.404781	0.900061	12	ko00330	ncbi_733602(CKMT2);ncbi_733685(ALDH2);ncbi_100126844(GATM);ncbi_397264(CKM);ncbi_100170117(SAT2);ncbi_100820830(ALDH4A1);ncbi_414385(SRM)	K00933+K00128+K00613+K00933+K00657+K00294+K00797	Com_1009_pos;Com_136_pos;Com_196_pos;Com_92_pos;Com_17389_pos;Com_22196_pos;Com_27076_pos;Com_37822_pos;Com_1036_neg;Com_308_neg;Com_3253_neg;Com_1760_neg	C00791+C00750+C00300+C00315+C01157+C04137+C01035+C00019+C02305+C00025+C00062+C02946
Human Diseases	Neurodegenerative diseases	Prion diseases	5	33	0.406479	0.900061	2	ko05020	ncbi_397036(SOD1);ncbi_100518846(C1QB);ncbi_445460(C1QC);ncbi_407060(HSPA5);ncbi_100515564(NCAM1)	K04565+K03987+K03988+K09490+K06491	Com_18786_neg;Com_7286_neg	C00575+C02140
Metabolism	Amino acid metabolism	Valine, leucine and isoleucine biosynthesis	1	4	0.417569	0.901206	3	ko00290	ncbi_100518784(BCAT1)	K00826	Com_4291_pos;Com_1934_pos;Com_2463_pos	C00188+C00141+C02504
Metabolism	Metabolism of other amino acids	D-Glutamine and D-glutamate metabolism	1	4	0.417569	0.901206	1	ko00471	ncbi_399525(GLS)	K01425	Com_308_neg	C00025
Organismal Systems	Immune system	Leukocyte transendothelial migration	15	110	0.41804	0.901206	1	ko04670	ncbi_474162(MYLPF);ncbi_100142665(NCF2);ncbi_396659(CXCR4);ncbi_396690(MYL2);ncbi_396925(VCAM1);ncbi_397019(ITGB1);ncbi_397108(GP91-PHOX);ncbi_397391(MMP2);ncbi_100517325(SIPA1);ncbi_100621541(BCAR1);ncbi_100623707(PIK3R1);ncbi_100622559(PIK3CB);ncbi_102166598(JAM2);ncbi_100620989(RAPGEF3);ncbi_110261011(VASP)	K12758+K08010+K04189+K10351+K06527+K05719+K21421+K01398+K08013+K05726+K02649+K00922+K06735+K08014+K06274	Com_18786_neg	C00575
Environmental Information Processing	Signal transduction	Rap1 signaling pathway	27	203	0.418625	0.901206	1	ko04015	ncbi_654328(MET);ncbi_100512494(PFN1);ncbi_492313(THBS1);ncbi_100522839(ID1);ncbi_396717(FGF9);ncbi_397019(ITGB1);ncbi_397083(EGF);ncbi_397509(KITLG);ncbi_100153223(MAGI3);ncbi_100518950(FGF19);ncbi_100518251(KRAS);ncbi_100514612(BRAF);ncbi_100517325(SIPA1);ncbi_100621541(BCAR1);ncbi_100623707(PIK3R1);ncbi_100515978(ANGPT4);ncbi_110256149(MAP2K3);ncbi_100622559(PIK3CB);ncbi_100174945(PRKCI);ncbi_…	K05099+K05759+K16857+K04680+K04358+K05719+K04357+K05461+K06112+K22603+K07827+K04365+K08013+K05726+K02649+K05467+K04432+K00922+K06069+K05860+K04358+K02833+K04527+K08014+K17703+K06274+K05094	Com_18786_neg	C00575
Metabolism	Metabolism of cofactors and vitamins	Pantothenate and CoA biosynthesis	3	19	0.437663	0.909418	4	ko00770	ncbi_100152913(PPCDC);ncbi_397109(DPYD);ncbi_100518784(BCAT1)	K01598+K00207+K00826	Com_156_pos;Com_1934_pos;Com_2837_neg;Com_1838_neg	C00864+C00141+C00049+C00106
Cellular Processes	Cell motility	Regulation of actin cytoskeleton	27	205	0.439983	0.909418	1	ko04810	ncbi_474162(MYLPF);ncbi_397285(ITGAV);ncbi_100154462(ARPC5L);ncbi_100512494(PFN1);ncbi_396659(CXCR4);ncbi_396690(MYL2);ncbi_396717(FGF9);ncbi_397019(ITGB1);ncbi_397083(EGF);ncbi_397378(PPP1CB);ncbi_100156359(LIMK2);ncbi_100157825(SSH1);ncbi_100518950(FGF19);ncbi_100518251(KRAS);ncbi_100627936(PAK4);ncbi_100522824(GNA13);ncbi_100514612(BRAF);ncbi_100621541(BCAR1);ncbi_100623707(PIK3R1);ncbi_100515…	K12758+K06487+K05754+K05759+K04189+K10351+K04358+K05719+K04357+K06269+K05744+K05766+K22603+K07827+K05734+K04639+K04365+K05726+K02649+K05767+K05766+K00922+K04410+K04358+K02833+K05722+K05094	Com_6717_pos	C01996
Organismal Systems	Aging	Longevity regulating pathway - mammal	12	89	0.452238	0.928435	5	ko04211	ncbi_100188978(APPL1);ncbi_397276(TP53);ncbi_397504(PRKAA2);ncbi_100518251(KRAS);ncbi_100623707(PIK3R1);ncbi_100515635(CREB5);ncbi_110255858(IRS2);ncbi_100622559(PIK3CB);ncbi_110259208(HRAS);ncbi_396755(INSR);ncbi_100622699(RB1CC1);ncbi_100739102(ATG5)	K08733+K04451+K07198+K07827+K02649+K09047+K07187+K00922+K02833+K04527+K17589+K08339	Com_27274_pos;Com_24643_pos;Com_18786_neg;Com_4049_neg;Com_1844_neg	C00020+C00003+C00575+C00003+C07909
Metabolism	Metabolism of other amino acids	Glutathione metabolism	7	51	0.469712	0.957965	7	ko00480	ncbi_396598(GPX3);ncbi_397117(GSTO1);ncbi_397682(GSTA1);ncbi_397546(PGD);ncbi_100510917(LOC100510917);ncbi_100622986(G6PD);ncbi_414385(SRM)	K00432+K00799+K00799+K00033+K00799+K00036+K00797	Com_136_pos;Com_92_pos;Com_28093_pos;Com_56_pos;Com_308_neg;Com_24128_neg;Com_9531_neg	C00750+C00315+C00051+C01879+C00025+C03740+C00072
Metabolism	Metabolism of cofactors and vitamins	Nicotinate and nicotinamide metabolism	4	29	0.508189	0.981406	8	ko00760	ncbi_595123(NAMPT);ncbi_100518171(NMRK1);ncbi_100526240(NT5C);ncbi_110256004(NT5C3B)	K03462+K10524+K01081+K01081	Com_226_pos;Com_24643_pos;Com_22983_pos;Com_826_pos;Com_5747_neg;Com_2837_neg;Com_4049_neg;Com_5238_neg	C00153+C00003+C00455+C00455+C00111+C00049+C00003+C00122
Metabolism	Carbohydrate metabolism	Pyruvate metabolism	5	37	0.509698	0.981406	4	ko00620	ncbi_733685(ALDH2);ncbi_397039(MDH2);ncbi_397630(PC);ncbi_100154828(ACSS1);ncbi_100154014(GRHPR)	K00128+K00026+K01958+K01895+K00049	Com_2463_pos;Com_2068_neg;Com_1305_neg;Com_5238_neg	C02504+C00074+C00149+C00122
Organismal Systems	Excretory system	Aldosterone-regulated sodium reabsorption	5	37	0.509698	0.981406	4	ko04960	ncbi_100518251(KRAS);ncbi_100623707(PIK3R1);ncbi_100622559(PIK3CB);ncbi_100512083(NEDD4L);ncbi_396755(INSR)	K07827+K02649+K00922+K13305+K04527	Com_8549_pos;Com_20746_pos;Com_1105_pos;Com_18786_neg	C00735+C00735+C00762+C00575
Organismal Systems	Excretory system	Proximal tubule bicarbonate reclamation	3	22	0.538764	0.99855	3	ko04964	ncbi_503546(SLC4A4);ncbi_100511956(CA4);ncbi_399525(GLS)	K13575+K18246+K01425	Com_308_neg;Com_2068_neg;Com_1305_neg	C00025+C00074+C00149
Metabolism	Metabolism of cofactors and vitamins	Thiamine metabolism	2	14	0.543855	0.99855	5	ko00730	ncbi_733667(AK4);ncbi_100521423(AK1)	K00939+K00939	Com_1937_pos;Com_6086_pos;Com_24643_pos;Com_71_neg;Com_4049_neg	C00378+C04294+C00003+C00082+C00003
Human Diseases	Infectious diseases	Chagas disease (American trypanosomiasis)	13	103	0.547108	0.99855	2	ko05142	ncbi_414381(CFLAR);ncbi_595129(FADD);ncbi_396665(TGFBR1);ncbi_396629(TRAF6);ncbi_397090(PPP2R2A);ncbi_100518846(C1QB);ncbi_445460(C1QC);ncbi_100155304(SMAD2);ncbi_397302(CD247);ncbi_397400(TGFB3);ncbi_396609(MAPK9);ncbi_100623707(PIK3R1);ncbi_100622559(PIK3CB)	K04724+K02373+K04674+K03175+K04354+K03987+K03988+K04500+K06453+K13377+K04440+K02649+K00922	Com_18786_neg;Com_3253_neg	C00575+C00062
Metabolism	Carbohydrate metabolism	Inositol phosphate metabolism	9	71	0.550101	0.99855	4	ko00562	ncbi_100152339(ITPK1);ncbi_100156264(PTEN);ncbi_100462718(INPPL1);ncbi_100510987(INPP5J);ncbi_100621788(SACM1L);ncbi_100153301(ALDH6A1);ncbi_100622559(PIK3CB);ncbi_100157745(PLCE1);ncbi_100623115(PI4K2B)	K00913+K01110+K15909+K01106+K21797+K00140+K00922+K05860+K13711	Com_21121_pos;Com_15334_neg;Com_992_neg;Com_5747_neg	C01204+C01220+C00137+C00111
Metabolism	Carbohydrate metabolism	Propanoate metabolism	4	31	0.563069	0.99855	2	ko00640	ncbi_100158147(PCCB);ncbi_399535(MUT);ncbi_100154828(ACSS1);ncbi_100153301(ALDH6A1)	K01966+K01847+K01895+K00140	Com_5747_neg;Com_2034_neg	C00111+C02170
Environmental Information Processing	Signal transduction	PI3K-Akt signaling pathway	42	337	0.565242	0.99855	1	ko04151	ncbi_654328(MET);ncbi_780426(CCND3);ncbi_397285(ITGAV);ncbi_100101925(PPP2R5A);ncbi_100156264(PTEN);ncbi_396632(BCL2L11);ncbi_397090(PPP2R2A);ncbi_100525377(PPP2R5E);ncbi_492313(THBS1);ncbi_100154715(CDK2);ncbi_396658(IFNAR1);ncbi_396717(FGF9);ncbi_397276(TP53);ncbi_397019(ITGB1);ncbi_397028(HSP90AA1);ncbi_397083(EGF);ncbi_397201(JAK2);ncbi_397488(GHR);ncbi_397504(PRKAA2);ncbi_397509(KITLG);ncbi_…	K05099+K10152+K06487+K11584+K01110+K16341+K04354+K11584+K16857+K02206+K05130+K04358+K04451+K05719+K04079+K04357+K04447+K05080+K07198+K05461+K22603+K07827+K05057+K08131+K04546+K06248+K02649+K05467+K09047+K04659+K06071+K06236+K11583+K00922+K06238+K04358+K06237+K02833+K04527+K13304+K16332+K05094	Com_27274_pos	C00020
Organismal Systems	Nervous system	Long-term potentiation	8	64	0.57014	0.99855	2	ko04720	ncbi_100523972(RPS6KA1);ncbi_397241(PPP3CA);ncbi_397378(PPP1CB);ncbi_396603(PPP3CB);ncbi_100518251(KRAS);ncbi_100514612(BRAF);ncbi_110259208(HRAS);ncbi_100620989(RAPGEF3)	K04373+K04348+K06269+K04348+K07827+K04365+K02833+K08014	Com_308_neg;Com_18786_neg	C00025+C00575
Environmental Information Processing	Signal transduction	AMPK signaling pathway	15	121	0.573808	0.999329	4	ko04152	ncbi_397561(FASN);ncbi_100101925(PPP2R5A);ncbi_100135663(MAP3K7);ncbi_397090(PPP2R2A);ncbi_100134828(FBP2);ncbi_100415929(CCNA2);ncbi_100525377(PPP2R5E);ncbi_397504(PRKAA2);ncbi_100511661(STRADB);ncbi_100623707(PIK3R1);ncbi_100515635(CREB5);ncbi_110255858(IRS2);ncbi_102160080(PPP2R3A);ncbi_100622559(PIK3CB);ncbi_396755(INSR)	K00665+K11584+K04427+K04354+K03841+K06627+K11584+K07198+K17532+K02649+K09047+K07187+K11583+K00922+K04527	Com_27274_pos;Com_24643_pos;Com_4049_neg;Com_8323_neg	C00020+C00003+C00003+C04677
Metabolism	Carbohydrate metabolism	Butanoate metabolism	3	24	0.600048	1	2	ko00650	ncbi_100157072(ALDH5A1);ncbi_396932(ACADS);ncbi_100152180(L2HGDH)	K00139+K00248+K00109	Com_308_neg;Com_5238_neg	C00025+C00122
Metabolism	Amino acid metabolism	Lysine degradation	7	58	0.611732	1	4	ko00310	ncbi_664651(SUV39H2);ncbi_733685(ALDH2);ncbi_100623006(KMT2A);ncbi_641354(PLOD2);ncbi_100514805(KMT2C);ncbi_767626(SUV39H1);ncbi_100518559(PRDM2)	K11419+K00128+K09186+K13645+K09188+K11419+K11432	Com_8813_pos;Com_10028_pos;Com_11095_neg;Com_6565_neg	C02727+C00047+C00449+C00489
Metabolism	Carbohydrate metabolism	Starch and sucrose metabolism	4	33	0.61442	1	4	ko00500	ncbi_397040(UGP2);ncbi_733659(PYGM);ncbi_100515088(PGM2L1);ncbi_100621536(PYGB)	K00963+K00688+K11809+K00688	Com_1543_pos;Com_140_pos;Com_18846_neg;Com_62_neg	C00208+C00208+C00689+C00252
Metabolism	Energy metabolism	Nitrogen metabolism	2	16	0.618681	1	1	ko00910	ncbi_100511956(CA4);ncbi_100156418(CA5B)	K18246+K01672	Com_308_neg	C00025
Metabolism	Global and overview maps	2-Oxocarboxylic acid metabolism	2	17	0.652393	1	15	ko01210	ncbi_396930(ACY1);ncbi_100518784(BCAT1)	K14677+K00826	Com_17_pos;Com_225_pos;Com_13748_pos;Com_14326_pos;Com_1934_pos;Com_2463_pos;Com_10028_pos;Com_489_neg;Com_308_neg;Com_71_neg;Com_4434_neg;Com_2837_neg;Com_5515_neg;Com_11743_neg;Com_3341_neg	C00079+C00073+C00437+C00624+C00141+C02504+C00047+C00158+C00025+C00082+C01179+C00049+C00078+C00417+C00166
Organismal Systems	Digestive system	Protein digestion and absorption	10	86	0.660426	1	11	ko04974	ncbi_397492(DPP4);ncbi_100152101(SLC8A3);ncbi_397175(COL11A1);ncbi_100511536(MME);ncbi_100144589(SLC3A2);ncbi_100621911(COL9A2);ncbi_100523209(COL7A1);ncbi_100738123(COL1A1);ncbi_100101551(COL6A3);ncbi_100737091(COL4A5)	K01278+K05849+K19721+K01389+K06519+K08131+K16628+K06236+K06238+K06237	Com_4291_pos;Com_17_pos;Com_225_pos;Com_14161_pos;Com_10028_pos;Com_754_neg;Com_308_neg;Com_71_neg;Com_2837_neg;Com_3253_neg;Com_5515_neg	C00188+C00079+C00073+C00146+C00047+C00135+C00025+C00082+C00049+C00062+C00078
Environmental Information Processing	Signal transduction	HIF-1 signaling pathway	11	96	0.68282	1	1	ko04066	ncbi_445512(HMOX1);ncbi_397083(EGF);ncbi_397108(GP91-PHOX);ncbi_100519651(ELOB);ncbi_100623707(PIK3R1);ncbi_100515978(ANGPT4);ncbi_100523673(EGLN2);ncbi_100512186(CUL2);ncbi_100622559(PIK3CB);ncbi_100153461(EGLN1);ncbi_396755(INSR)	K00510+K04357+K21421+K03873+K02649+K05467+K09592+K03870+K00922+K09592+K04527	Com_9531_neg	C00072
Metabolism	Lipid metabolism	Ether lipid metabolism	5	45	0.688514	1	1	ko00565	ncbi_396593(PLA2G7);ncbi_100519446(PLD1);ncbi_100217397(LPCAT1);ncbi_100623755(PAFAH2);ncbi_100627169(AGPS)	K01062+K01115+K13510+K01062+K00803	Com_634_pos	C00670
Organismal Systems	Immune system	Chemokine signaling pathway	20	172	0.69103	1	1	ko04062	ncbi_414374(CCR1);ncbi_414904(CXCL2);ncbi_396655(STAT1);ncbi_396659(CXCR4);ncbi_397201(JAK2);ncbi_100152937(GRK5);ncbi_100156321(SHC1);ncbi_100518251(KRAS);ncbi_100621111(NFKBIB);ncbi_100514612(BRAF);ncbi_100621541(BCAR1);ncbi_100519668(GRK4);ncbi_100522202(GNG11);ncbi_100623707(PIK3R1);ncbi_100520680(LOC100520680);ncbi_100170767(ARRB2);ncbi_100622559(PIK3CB);ncbi_102164918(SHC3);ncbi_110259208(H…	K04176+K05505+K11220+K04189+K04447+K08291+K06279+K07827+K02581+K04365+K05726+K08291+K04546+K02649+K05407+K04439+K00922+K17448+K02833+K05508	Com_18786_neg	C00575
Environmental Information Processing	Signal transduction	VEGF signaling pathway	6	55	0.711015	1	1	ko04370	ncbi_397241(PPP3CA);ncbi_396603(PPP3CB);ncbi_100518251(KRAS);ncbi_100623707(PIK3R1);ncbi_100622559(PIK3CB);ncbi_110259208(HRAS)	K04348+K04348+K07827+K02649+K00922+K02833	Com_13965_pos	C01312
Metabolism	Amino acid metabolism	Arginine biosynthesis	2	19	0.712628	1	7	ko00220	ncbi_396930(ACY1);ncbi_399525(GLS)	K14677+K01425	Com_13748_pos;Com_14326_pos;Com_38082_pos;Com_308_neg;Com_2837_neg;Com_3253_neg;Com_5238_neg	C00437+C00624+C03406+C00025+C00049+C00062+C00122
Human Diseases	Infectious diseases	Pertussis	8	73	0.71986	1	1	ko05133	ncbi_100125555(LY96);ncbi_396629(TRAF6);ncbi_100518846(C1QB);ncbi_445460(C1QC);ncbi_397019(ITGB1);ncbi_396609(MAPK9);ncbi_100156777(CASP7);ncbi_445464(C1R)	K05400+K03175+K03987+K03988+K05719+K04440+K04397+K01330	Com_18786_neg	C00575
Human Diseases	Cardiovascular diseases	Dilated cardiomyopathy (DCM)	9	83	0.737999	1	1	ko05414	ncbi_396725(DES);ncbi_397285(ITGAV);ncbi_100126859(LMNA);ncbi_396690(MYL2);ncbi_397019(ITGB1);ncbi_397400(TGFB3);ncbi_100623668(SGCG);ncbi_100622149(CACNA1S);ncbi_396856(RYR2)	K07610+K06487+K12641+K10351+K05719+K13377+K12564+K04857+K04962	Com_18786_neg	C00575
Organismal Systems	Nervous system	Long-term depression	6	58	0.758633	1	2	ko04730	ncbi_396718(RYR1);ncbi_100518251(KRAS);ncbi_100519996(GRIA3);ncbi_100522824(GNA13);ncbi_100514612(BRAF);ncbi_110259208(HRAS)	K04961+K07827+K05199+K04639+K04365+K02833	Com_308_neg;Com_5_neg	C00025+C00219
Metabolism	Xenobiotics biodegradation and metabolism	Metabolism of xenobiotics by cytochrome P450	5	49	0.759267	1	3	ko00980	ncbi_397117(GSTO1);ncbi_397337(DHDH);ncbi_397682(GSTA1);ncbi_403103(CYP1A1);ncbi_100510917(LOC100510917)	K00799+K00078+K00799+K07408+K00799	Com_10405_pos;Com_11582_pos;Com_5527_neg	C06800+C16453+C11713
Organismal Systems	Endocrine system	Thyroid hormone signaling pathway	12	112	0.772119	1	1	ko04919	ncbi_414430(MED27);ncbi_397285(ITGAV);ncbi_100113425(BMP4);ncbi_396655(STAT1);ncbi_397276(TP53);ncbi_100518251(KRAS);ncbi_100524215(KAT2A);ncbi_100623707(PIK3R1);ncbi_100622559(PIK3CB);ncbi_100151978(MED13L);ncbi_100157745(PLCE1);ncbi_110259208(HRAS)	K15170+K06487+K04662+K11220+K04451+K07827+K06062+K02649+K00922+K15164+K05860+K02833	Com_18786_neg	C00575
Metabolism	Lipid metabolism	Glycerolipid metabolism	6	59	0.773158	1	1	ko00561	ncbi_396816(AKR1B1);ncbi_733685(ALDH2);ncbi_100312967(DGKE);ncbi_396924(AKR1A1);ncbi_397118(DGAT1);ncbi_100623089(MBOAT2)	K00011+K00128+K00901+K00002+K11155+K13517	Com_5747_neg	C00111
Metabolism	Lipid metabolism	Glycerophospholipid metabolism	10	95	0.777503	1	4	ko00564	ncbi_100312967(DGKE);ncbi_100505461(CHKB);ncbi_100519446(PLD1);ncbi_397654(PEMT);ncbi_100217397(LPCAT1);ncbi_100622761(LPGAT1);ncbi_100524423(PNPLA6);ncbi_110255933(PCYT2);ncbi_100623089(MBOAT2);ncbi_110260948(PLA2G15)	K00901+K14156+K01115+K00551+K13510+K13514+K14676+K00967+K13517+K06129	Com_233_pos;Com_6717_pos;Com_634_pos;Com_5747_neg	C00114+C01996+C00670+C00111
Organismal Systems	Endocrine system	Glucagon signaling pathway	10	95	0.777503	1	5	ko04922	ncbi_100188980(PGAM2);ncbi_100310801(PHKG2);ncbi_397548(PHKG1);ncbi_397241(PPP3CA);ncbi_397504(PRKAA2);ncbi_396603(PPP3CB);ncbi_733659(PYGM);ncbi_100286877(PRMT1);ncbi_100515635(CREB5);ncbi_100621536(PYGB)	K01834+K00871+K00871+K04348+K07198+K04348+K00688+K11434+K09047+K00688	Com_489_neg;Com_18786_neg;Com_2068_neg;Com_1305_neg;Com_5238_neg	C00158+C00575+C00074+C00149+C00122
Metabolism	Lipid metabolism	Fatty acid degradation	4	41	0.779335	1	1	ko00071	ncbi_733685(ALDH2);ncbi_100134957(ECI2);ncbi_100312959(ACAA2);ncbi_396932(ACADS)	K00128+K13239+K07508+K00248	Com_6565_neg	C00489
Organismal Systems	Digestive system	Vitamin digestion and absorption	2	22	0.786368	1	11	ko04977	ncbi_100522014(SLC5A6);ncbi_100153685(LMBRD1)	K14386+K14617	Com_226_pos;Com_156_pos;Com_1937_pos;Com_40620_pos;Com_24643_pos;Com_13599_pos;Com_2951_neg;Com_9531_neg;Com_4049_neg;Com_7240_neg;Com_7427_neg	C00153+C00864+C00378+C00187+C00003+C00534+C00255+C00072+C00003+C00016+C00504
Environmental Information Processing	Signal transduction	Phosphatidylinositol signaling system	10	97	0.799122	1	3	ko04070	ncbi_100152339(ITPK1);ncbi_100156264(PTEN);ncbi_100312967(DGKE);ncbi_100462718(INPPL1);ncbi_100510987(INPP5J);ncbi_100621788(SACM1L);ncbi_100623707(PIK3R1);ncbi_100622559(PIK3CB);ncbi_100157745(PLCE1);ncbi_100623115(PI4K2B)	K00913+K01110+K00901+K15909+K01106+K21797+K02649+K00922+K05860+K13711	Com_21121_pos;Com_15334_neg;Com_992_neg	C01204+C01220+C00137
Organismal Systems	Endocrine system	GnRH signaling pathway	9	89	0.808909	1	2	ko04912	ncbi_100519446(PLD1);ncbi_397391(MMP2);ncbi_100518251(KRAS);ncbi_396617(MAP3K1);ncbi_396609(MAPK9);ncbi_100622149(CACNA1S);ncbi_102164433(MAPK7);ncbi_110256149(MAP2K3);ncbi_110259208(HRAS)	K01115+K01398+K07827+K04416+K04440+K04857+K04464+K04432+K02833	Com_18786_neg;Com_5_neg	C00575+C00219
Human Diseases	Infectious diseases	Salmonella infection	8	80	0.809149	1	1	ko05132	ncbi_414904(CXCL2);ncbi_100154462(ARPC5L);ncbi_100626901(DYNC1LI2);ncbi_100512494(PFN1);ncbi_396609(MAPK9);ncbi_100736682(TJP1);ncbi_100620825(LOC100620825);ncbi_100154766(PKN2)	K05505+K05754+K10416+K05759+K04440+K05701+K07863+K06071	Com_3253_neg	C00062
Organismal Systems	Excretory system	Vasopressin-regulated water reabsorption	4	43	0.810467	1	1	ko04962	ncbi_100126235(AQP3);ncbi_100144499(RAB5A);ncbi_100626901(DYNC1LI2);ncbi_100515635(CREB5)	K09876+K07887+K10416+K09047	Com_18786_neg	C00575
Environmental Information Processing	Signal transduction	Phospholipase D signaling pathway	15	144	0.824815	1	2	ko04072	ncbi_100312967(DGKE);ncbi_100519446(PLD1);ncbi_397083(EGF);ncbi_397509(KITLG);ncbi_100156321(SHC1);ncbi_100518251(KRAS);ncbi_100519976(AGTR1);ncbi_100522824(GNA13);ncbi_100623707(PIK3R1);ncbi_100520271(GRM2);ncbi_100622559(PIK3CB);ncbi_102164918(SHC3);ncbi_110259208(HRAS);ncbi_396755(INSR);ncbi_100620989(RAPGEF3)	K00901+K01115+K04357+K05461+K06279+K07827+K04166+K04639+K02649+K04605+K00922+K17448+K02833+K04527+K08014	Com_308_neg;Com_18786_neg	C00025+C00575
Metabolism	Metabolism of cofactors and vitamins	Folate biosynthesis	2	24	0.825778	1	2	ko00790	ncbi_396816(AKR1B1);ncbi_100521367(SPR)	K00011+K00072	Com_7427_neg;Com_6974_neg	C00504+C00415
Organismal Systems	Immune system	Fc gamma R-mediated phagocytosis	8	82	0.830232	1	1	ko04666	ncbi_100154462(ARPC5L);ncbi_100462718(INPPL1);ncbi_100519446(PLD1);ncbi_100156359(LIMK2);ncbi_100522631(PTPRC);ncbi_100623707(PIK3R1);ncbi_100622559(PIK3CB);ncbi_110261011(VASP)	K05754+K15909+K01115+K05744+K06478+K02649+K00922+K06274	Com_5_neg	C00219
Organismal Systems	Immune system	Fc epsilon RI signaling pathway	6	64	0.836053	1	5	ko04664	ncbi_100518251(KRAS);ncbi_396609(MAPK9);ncbi_100623707(PIK3R1);ncbi_110256149(MAP2K3);ncbi_100622559(PIK3CB);ncbi_110259208(HRAS)	K07827+K04440+K02649+K04432+K00922+K02833	Com_7312_pos;Com_7196_pos;Com_13476_pos;Com_4508_neg;Com_5_neg	C05951+C02166+C05952+C00696+C00219
Human Diseases	Immune diseases	Asthma	2	25	0.842923	1	3	ko05310	ncbi_100135040(SLA-DRA);ncbi_100135050(SLA-DMB)	K06752+K06752	Com_7312_pos;Com_7196_pos;Com_4508_neg	C05951+C02166+C00696
Metabolism	Amino acid metabolism	Alanine, aspartate and glutamate metabolism	3	36	0.850939	1	5	ko00250	ncbi_100157072(ALDH5A1);ncbi_100820830(ALDH4A1);ncbi_399525(GLS)	K00139+K00294+K01425	Com_38082_pos;Com_489_neg;Com_308_neg;Com_2837_neg;Com_5238_neg	C03406+C00158+C00025+C00049+C00122
Metabolism	Xenobiotics biodegradation and metabolism	Drug metabolism - cytochrome P450	4	47	0.861954	1	1	ko00982	ncbi_397117(GSTO1);ncbi_397682(GSTA1);ncbi_100510917(LOC100510917);ncbi_100621718(FMO4)	K00799+K00799+K00799+K00485	Com_12270_pos	C16560
Human Diseases	Cancers	Choline metabolism in cancer	9	96	0.872179	1	2	ko05231	ncbi_100312967(DGKE);ncbi_100505461(CHKB);ncbi_100519446(PLD1);ncbi_397083(EGF);ncbi_100518251(KRAS);ncbi_396609(MAPK9);ncbi_100623707(PIK3R1);ncbi_100622559(PIK3CB);ncbi_110259208(HRAS)	K00901+K14156+K01115+K04357+K07827+K04440+K02649+K00922+K02833	Com_233_pos;Com_634_pos	C00114+C00670
Metabolism	Lipid metabolism	Steroid hormone biosynthesis	4	49	0.882876	1	13	ko00140	ncbi_100154372(HSD17B8);ncbi_403103(CYP1A1);ncbi_100525350(LOC100525350);ncbi_102165015(LOC102165015)	K13370+K07408+K12345+K07412	Com_33974_pos;Com_25418_pos;Com_40620_pos;Com_28650_pos;Com_5124_pos;Com_43797_pos;Com_36804_pos;Com_8549_pos;Com_20746_pos;Com_10212_pos;Com_19053_pos;Com_1105_pos;Com_7286_neg	C00280+C00535+C00187+C00523+C00951+C00468+C01953+C00735+C00735+C05285+C05141+C00762+C02140
Environmental Information Processing	Signal transduction	cGMP - PKG signaling pathway	16	162	0.885671	1	4	ko04022	ncbi_100516962(ATP2A1);ncbi_397241(PPP3CA);ncbi_397378(PPP1CB);ncbi_100158185(SLC25A5);ncbi_100152101(SLC8A3);ncbi_396603(PPP3CB);ncbi_100152612(PPIF);ncbi_100519976(AGTR1);ncbi_100271728(TRPC6);ncbi_100522824(GNA13);ncbi_100155958(SRF);ncbi_100515635(CREB5);ncbi_100622149(CACNA1S);ncbi_110255858(IRS2);ncbi_396755(INSR);ncbi_110261011(VASP)	K05853+K04348+K06269+K05863+K05849+K04348+K09565+K04166+K04969+K04639+K04378+K09047+K04857+K07187+K04527+K06274	Com_27274_pos;Com_190_pos;Com_6944_pos;Com_18786_neg	C00020+C00212+C00144+C00575
Metabolism	Carbohydrate metabolism	Citrate cycle (TCA cycle)	2	29	0.897189	1	5	ko00020	ncbi_397039(MDH2);ncbi_397630(PC)	K00026+K01958	Com_489_neg;Com_2068_neg;Com_11743_neg;Com_1305_neg;Com_5238_neg	C00158+C00074+C00417+C00149+C00122
Organismal Systems	Circulatory system	Adrenergic signaling in cardiomyocytes	13	137	0.898192	1	2	ko04261	ncbi_100101925(PPP2R5A);ncbi_397090(PPP2R2A);ncbi_100525377(PPP2R5E);ncbi_396690(MYL2);ncbi_396860(MYH7);ncbi_397378(PPP1CB);ncbi_100519976(AGTR1);ncbi_100621502(KCNE1);ncbi_100515635(CREB5);ncbi_100622149(CACNA1S);ncbi_102160080(PPP2R3A);ncbi_396856(RYR2);ncbi_100620989(RAPGEF3)	K11584+K04354+K11584+K10351+K17751+K06269+K04166+K04894+K09047+K04857+K11583+K04962+K08014	Com_10082_pos;Com_18786_neg	C00788+C00575
Organismal Systems	Nervous system	Synaptic vesicle cycle	5	61	0.899362	1	3	ko04721	ncbi_100271929(CLTC);ncbi_100521769(TCIRG1);ncbi_100736975(ATP6V1E2);ncbi_100621404(UNC13B);ncbi_100187581(CLTA)	K04646+K02154+K02150+K15293+K04644	Com_6717_pos;Com_22_pos;Com_308_neg	C01996+C03758+C00025
Human Diseases	Cancers	Chemical carcinogenesis	5	61	0.899362	1	2	ko05204	ncbi_397117(GSTO1);ncbi_397682(GSTA1);ncbi_403103(CYP1A1);ncbi_100510917(LOC100510917);ncbi_102165015(LOC102165015)	K00799+K00799+K07408+K00799+K07412	Com_10405_pos;Com_11582_pos	C06800+C16453
Organismal Systems	Nervous system	Glutamatergic synapse	10	110	0.903261	1	2	ko04724	ncbi_100156938(TRPC1);ncbi_100519446(PLD1);ncbi_397241(PPP3CA);ncbi_396603(PPP3CB);ncbi_100512353(SHANK1);ncbi_100519996(GRIA3);ncbi_100522202(GNG11);ncbi_100526210(HOMER3);ncbi_100520271(GRM2);ncbi_399525(GLS)	K04964+K01115+K04348+K04348+K15009+K05199+K04546+K15010+K04605+K01425	Com_308_neg;Com_18786_neg	C00025+C00575
Metabolism	Carbohydrate metabolism	Glycolysis / Gluconeogenesis	5	62	0.906955	1	2	ko00010	ncbi_733685(ALDH2);ncbi_100188980(PGAM2);ncbi_100134828(FBP2);ncbi_396924(AKR1A1);ncbi_100154828(ACSS1)	K00128+K01834+K03841+K00002+K01895	Com_5747_neg;Com_2068_neg	C00111+C00074
Organismal Systems	Endocrine system	Estrogen signaling pathway	12	130	0.910154	1	2	ko04915	ncbi_100141417(GABBR1);ncbi_100337672(FKBP4);ncbi_397028(HSP90AA1);ncbi_397391(MMP2);ncbi_100156275(EBAG9);ncbi_100156321(SHC1);ncbi_100518251(KRAS);ncbi_100623707(PIK3R1);ncbi_100515635(CREB5);ncbi_100622559(PIK3CB);ncbi_102164918(SHC3);ncbi_110259208(HRAS)	K04615+K09571+K04079+K01398+K22455+K06279+K07827+K02649+K09047+K00922+K17448+K02833	Com_5124_pos;Com_18786_neg	C00951+C00575
Metabolism	Carbohydrate metabolism	Ascorbate and aldarate metabolism	1	18	0.912397	1	4	ko00053	ncbi_733685(ALDH2)	K00128	Com_4817_neg;Com_992_neg;Com_6759_neg;Com_9531_neg	C00167+C00137+C00259+C00072
Organismal Systems	Nervous system	Cholinergic synapse	10	112	0.914362	1	3	ko04725	ncbi_397201(JAK2);ncbi_100518251(KRAS);ncbi_100526228(KCNQ4);ncbi_100154391(KCNQ5);ncbi_100522202(GNG11);ncbi_100623707(PIK3R1);ncbi_100515635(CREB5);ncbi_100622149(CACNA1S);ncbi_100622559(PIK3CB);ncbi_110259208(HRAS)	K04447+K07827+K04929+K04930+K04546+K02649+K09047+K04857+K00922+K02833	Com_233_pos;Com_6717_pos;Com_18786_neg	C00114+C01996+C00575
Human Diseases	Substance dependence	Amphetamine addiction	5	64	0.920653	1	5	ko05031	ncbi_397241(PPP3CA);ncbi_397378(PPP1CB);ncbi_396603(PPP3CB);ncbi_100519996(GRIA3);ncbi_100515635(CREB5)	K04348+K06269+K04348+K05199+K09047	Com_22_pos;Com_2319_pos;Com_308_neg;Com_71_neg;Com_18786_neg	C03758+C00355+C00025+C00082+C00575
Organismal Systems	Endocrine system	Regulation of lipolysis in adipocyte	4	54	0.923517	1	6	ko04923	ncbi_100623707(PIK3R1);ncbi_110255858(IRS2);ncbi_100622559(PIK3CB);ncbi_396755(INSR)	K02649+K07187+K00922+K04527	Com_27274_pos;Com_190_pos;Com_10082_pos;Com_18786_neg;Com_7286_neg;Com_5_neg	C00020+C00212+C00788+C00575+C02140+C00219
Human Diseases	Infectious diseases	African trypanosomiasis	2	33	0.933562	1	3	ko05143	ncbi_396925(VCAM1);ncbi_397442(THOP1)	K06527+K01392	Com_4186_neg;Com_5515_neg;Com_4508_neg	C00328+C00078+C00696
Organismal Systems	Nervous system	Dopaminergic synapse	11	126	0.934962	1	5	ko04728	ncbi_100101925(PPP2R5A);ncbi_397090(PPP2R2A);ncbi_100525377(PPP2R5E);ncbi_397241(PPP3CA);ncbi_397378(PPP1CB);ncbi_396603(PPP3CB);ncbi_100519996(GRIA3);ncbi_396609(MAPK9);ncbi_100522202(GNG11);ncbi_100515635(CREB5);ncbi_102160080(PPP2R3A)	K11584+K04354+K11584+K04348+K06269+K04348+K05199+K04440+K04546+K09047+K11583	Com_22_pos;Com_2319_pos;Com_71_neg;Com_18786_neg;Com_9194_neg	C03758+C00355+C00082+C00575+C05582
Metabolism	Amino acid metabolism	Phenylalanine metabolism	1	21	0.941655	1	9	ko00360	ncbi_100520329(LOC100520329)	K00276	Com_17_pos;Com_3373_pos;Com_288_neg;Com_43_neg;Com_71_neg;Com_734_neg;Com_28_neg;Com_5238_neg;Com_3341_neg	C00079+C01586+C00423+C05598+C00082+C00805+C02265+C00122+C00166
Organismal Systems	Endocrine system	Melanogenesis	8	99	0.944087	1	2	ko04916	ncbi_414439(ASIP);ncbi_100337669(FZD2);ncbi_100157360(FZD6);ncbi_397509(KITLG);ncbi_100512949(WNT9A);ncbi_100518251(KRAS);ncbi_100519058(FZD5);ncbi_110259208(HRAS)	K08725+K02235+K02376+K05461+K01064+K07827+K02375+K02833	Com_71_neg;Com_18786_neg	C00082+C00575
Organismal Systems	Immune system	Platelet activation	10	120	0.948599	1	3	ko04611	ncbi_100512755(SNAP23);ncbi_397019(ITGB1);ncbi_397378(PPP1CB);ncbi_100522721(RASGRP1);ncbi_100522824(GNA13);ncbi_100623707(PIK3R1);ncbi_100738123(COL1A1);ncbi_100622559(PIK3CB);ncbi_100174945(PRKCI);ncbi_110261011(VASP)	K08508+K05719+K06269+K04350+K04639+K02649+K06236+K00922+K06069+K06274	Com_13965_pos;Com_18786_neg;Com_5_neg	C01312+C00575+C00219
Metabolism	Amino acid metabolism	Histidine metabolism	1	23	0.955508	1	8	ko00340	ncbi_733685(ALDH2)	K00128	Com_20635_pos;Com_11699_pos;Com_30923_pos;Com_754_neg;Com_308_neg;Com_2837_neg;Com_8323_neg;Com_3976_neg	C01152+C05135+C01152+C00135+C00025+C00049+C04677+C00386
Organismal Systems	Endocrine system	Thyroid hormone synthesis	5	71	0.955578	1	2	ko04918	ncbi_396598(GPX3);ncbi_100519184(CANX);ncbi_407060(HSPA5);ncbi_100515635(CREB5);ncbi_100511433(TTF1)	K00432+K08054+K09490+K09047+K15225	Com_28093_pos;Com_18786_neg	C00051+C00575
Organismal Systems	Digestive system	Fat digestion and absorption	2	37	0.957512	1	1	ko04975	ncbi_100152112(ABCA1);ncbi_397118(DGAT1)	K05641+K11155	Com_40620_pos	C00187
Human Diseases	Substance dependence	Nicotine addiction	2	38	0.962058	1	2	ko05033	ncbi_100519996(GRIA3);ncbi_100625298(GABRG3)	K05199+K05186	Com_6717_pos;Com_308_neg	C01996+C00025
Environmental Information Processing	Signal transduction	Calcium signaling pathway	16	183	0.962618	1	2	ko04020	ncbi_396718(RYR1);ncbi_100310801(PHKG2);ncbi_100516962(ATP2A1);ncbi_397548(PHKG1);ncbi_396659(CXCR4);ncbi_397241(PPP3CA);ncbi_100158185(SLC25A5);ncbi_100152101(SLC8A3);ncbi_396603(PPP3CB);ncbi_100152612(PPIF);ncbi_100519976(AGTR1);ncbi_100625720(HRH2);ncbi_100521440(ORAI2);ncbi_100622149(CACNA1S);ncbi_396856(RYR2);ncbi_100157745(PLCE1)	K04961+K00871+K05853+K00871+K04189+K04348+K05863+K05849+K04348+K09565+K04166+K04150+K16057+K04857+K04962+K05860	Com_5511_neg;Com_18786_neg	C13050+C00575
Organismal Systems	Nervous system	GABAergic synapse	6	84	0.963369	1	2	ko04727	ncbi_100141417(GABBR1);ncbi_100521161(PLCL1);ncbi_100522202(GNG11);ncbi_100622149(CACNA1S);ncbi_399525(GLS);ncbi_100625298(GABRG3)	K04615+K15375+K04546+K04857+K01425+K05186	Com_308_neg;Com_18786_neg	C00025+C00575
Cellular Processes	Cellular community - eukaryotes	Gap junction	6	86	0.968923	1	3	ko04540	ncbi_397083(EGF);ncbi_100518251(KRAS);ncbi_100127131(LOC100127131);ncbi_100736682(TJP1);ncbi_102164433(MAPK7);ncbi_110259208(HRAS)	K04357+K07827+K07374+K05701+K04464+K02833	Com_22_pos;Com_308_neg;Com_18786_neg	C03758+C00025+C00575
Organismal Systems	Endocrine system	Renin secretion	4	65	0.971926	1	4	ko04924	ncbi_397241(PPP3CA);ncbi_396603(PPP3CB);ncbi_100519976(AGTR1);ncbi_100622149(CACNA1S)	K04348+K04348+K04166+K04857	Com_27274_pos;Com_190_pos;Com_10082_pos;Com_18786_neg	C00020+C00212+C00788+C00575
Organismal Systems	Digestive system	Carbohydrate digestion and absorption	2	41	0.973062	1	3	ko04973	ncbi_100623707(PIK3R1);ncbi_100622559(PIK3CB)	K02649+K00922	Com_1543_pos;Com_140_pos;Com_98_neg	C00208+C00208+C01835
Organismal Systems	Sensory system	Phototransduction	1	27	0.974133	1	1	ko04744	ncbi_102160209(SLC24A1)	K13749	Com_6944_pos	C00144
Organismal Systems	Digestive system	Pancreatic secretion	6	89	0.975819	1	3	ko04972	ncbi_503546(SLC4A4);ncbi_100156938(TRPC1);ncbi_100516962(ATP2A1);ncbi_100154771(RAB27B);ncbi_100516960(SLC12A2);ncbi_396856(RYR2)	K13575+K04964+K05853+K07886+K10951+K04962	Com_6717_pos;Com_5511_neg;Com_18786_neg	C01996+C13050+C00575
Organismal Systems	Excretory system	Endocrine and other factor-regulated calcium reabsorption	2	42	0.975991	1	2	ko04961	ncbi_100271929(CLTC);ncbi_100187581(CLTA)	K04646+K04644	Com_5124_pos;Com_18786_neg	C00951+C00575
Organismal Systems	Nervous system	Serotonergic synapse	8	111	0.977039	1	14	ko04726	ncbi_100156938(TRPC1);ncbi_100518251(KRAS);ncbi_100514612(BRAF);ncbi_100522202(GNG11);ncbi_100622149(CACNA1S);ncbi_100517307(SLC6A4);ncbi_110259208(HRAS);ncbi_100620989(RAPGEF3)	K04964+K07827+K04365+K04546+K04857+K05037+K02833+K08014	Com_9468_pos;Com_2176_pos;Com_36850_pos;Com_7196_pos;Com_1426_pos;Com_13899_pos;Com_18786_neg;Com_5515_neg;Com_2275_neg;Com_2258_neg;Com_11596_neg;Com_1951_neg;Com_4508_neg;Com_5_neg	C05957+C05954+C05635+C02166+C00643+C05635+C00575+C00078+C05965+C02165+C05953+C05356+C00696+C00219
Human Diseases	Substance dependence	Morphine addiction	6	90	0.977782	1	4	ko05032	ncbi_100141417(GABBR1);ncbi_100152937(GRK5);ncbi_100519668(GRK4);ncbi_100522202(GNG11);ncbi_100170767(ARRB2);ncbi_100625298(GABRG3)	K04615+K08291+K08291+K04546+K04439+K05186	Com_27274_pos;Com_190_pos;Com_22_pos;Com_18786_neg	C00020+C00212+C03758+C00575
Metabolism	Amino acid metabolism	Tryptophan metabolism	2	43	0.978611	1	12	ko00380	ncbi_733685(ALDH2);ncbi_403103(CYP1A1)	K00128+K07408	Com_3922_pos;Com_99_pos;Com_4321_pos;Com_36850_pos;Com_12527_pos;Com_1426_pos;Com_16022_pos;Com_13899_pos;Com_4186_neg;Com_5515_neg;Com_3728_neg;Com_283_neg	C01717+C00954+C02470+C05635+C01598+C00643+C02700+C05635+C00328+C00078+C05643+C00331
Metabolism	Metabolism of cofactors and vitamins	Retinol metabolism	3	57	0.981038	1	1	ko00830	ncbi_397118(DGAT1);ncbi_403103(CYP1A1);ncbi_102165015(LOC102165015)	K11155+K07408+K07412	Com_24341_neg	C16677
Human Diseases	Infectious diseases	Amoebiasis	6	92	0.981274	1	3	ko05146	ncbi_100144499(RAB5A);ncbi_397400(TGFB3);ncbi_100623707(PIK3R1);ncbi_100738123(COL1A1);ncbi_100622559(PIK3CB);ncbi_100737091(COL4A5)	K07887+K13377+K02649+K06236+K00922+K06237	Com_18786_neg;Com_3253_neg;Com_5_neg	C00575+C00062+C00219
Organismal Systems	Endocrine system	Oxytocin signaling pathway	11	148	0.985162	1	3	ko04921	ncbi_396718(RYR1);ncbi_100511150(CAMK1D);ncbi_397241(PPP3CA);ncbi_397378(PPP1CB);ncbi_397504(PRKAA2);ncbi_396603(PPP3CB);ncbi_100518251(KRAS);ncbi_100622149(CACNA1S);ncbi_102164433(MAPK7);ncbi_396856(RYR2);ncbi_110259208(HRAS)	K04961+K08794+K04348+K06269+K07198+K04348+K07827+K04857+K04464+K04962+K02833	Com_5511_neg;Com_18786_neg;Com_5_neg	C13050+C00575+C00219
Organismal Systems	Endocrine system	Ovarian Steroidogenesis	2	47	0.986582	1	9	ko04913	ncbi_403103(CYP1A1);ncbi_396755(INSR)	K07408+K04527	Com_33974_pos;Com_25418_pos;Com_40620_pos;Com_5124_pos;Com_43797_pos;Com_36804_pos;Com_18786_neg;Com_1951_neg;Com_5_neg	C00280+C00535+C00187+C00951+C00468+C01953+C00575+C05356+C00219
Human Diseases	Substance dependence	Cocaine addiction	2	47	0.986582	1	5	ko05030	ncbi_100515635(CREB5);ncbi_100520271(GRM2)	K09047+K04605	Com_22_pos;Com_2319_pos;Com_308_neg;Com_71_neg;Com_18786_neg	C03758+C00355+C00025+C00082+C00575
Metabolism	Lipid metabolism	Arachidonic acid metabolism	3	62	0.988838	1	14	ko00590	ncbi_396598(GPX3);ncbi_100155133(PTGES2);ncbi_102165015(LOC102165015)	K00432+K05309+K07412	Com_14472_pos;Com_9468_pos;Com_2176_pos;Com_13965_pos;Com_1863_pos;Com_7312_pos;Com_7196_pos;Com_13476_pos;Com_2275_neg;Com_2258_neg;Com_11596_neg;Com_1951_neg;Com_4508_neg;Com_5_neg	C14732+C05957+C05954+C01312+C05950+C05951+C02166+C05952+C05965+C02165+C05953+C05356+C00696+C00219
Metabolism	Amino acid metabolism	Tyrosine metabolism	1	35	0.991266	1	11	ko00350	ncbi_100520329(LOC100520329)	K00276	Com_22_pos;Com_19473_pos;Com_10565_pos;Com_10082_pos;Com_13721_pos;Com_14161_pos;Com_2319_pos;Com_71_neg;Com_4434_neg;Com_9194_neg;Com_5238_neg	C03758+C05579+C05589+C00788+C00544+C00146+C00355+C00082+C01179+C05582+C00122
Organismal Systems	Endocrine system	Aldosterone synthesis and secretion	5	92	0.993431	1	8	ko04925	ncbi_100511150(CAMK1D);ncbi_100519976(AGTR1);ncbi_100515635(CREB5);ncbi_100622149(CACNA1S);ncbi_102158891(ATF1)	K08794+K04166+K09047+K04857+K09053	Com_27274_pos;Com_40620_pos;Com_24643_pos;Com_36804_pos;Com_18786_neg;Com_7286_neg;Com_4049_neg;Com_5_neg	C00020+C00187+C00003+C01953+C00575+C02140+C00003+C00219
Organismal Systems	Environmental adaptation	Circadian entrainment	5	94	0.994583	1	3	ko04713	ncbi_396718(RYR1);ncbi_100519996(GRIA3);ncbi_100620648(PER1);ncbi_100522202(GNG11);ncbi_396856(RYR2)	K04961+K05199+K21944+K04546+K04962	Com_12527_pos;Com_308_neg;Com_18786_neg	C01598+C00025+C00575
Organismal Systems	Endocrine system	PPAR signaling pathway	3	71	0.995812	1	1	ko03320	ncbi_574074(FABP5);ncbi_399532(FABP3);ncbi_397553(NR1H3)	K08754+K08752+K08536	Com_2258_neg	C02165
Organismal Systems	Sensory system	Inflammatory mediator regulation of TRP channels	5	97	0.995956	1	4	ko04750	ncbi_397378(PPP1CB);ncbi_396609(MAPK9);ncbi_100623707(PIK3R1);ncbi_110256149(MAP2K3);ncbi_100622559(PIK3CB)	K06269+K04440+K02649+K04432+K00922	Com_18786_neg;Com_2275_neg;Com_2258_neg;Com_5_neg	C00575+C05965+C02165+C00219
Environmental Information Processing	Signal transduction	cAMP signaling pathway	13	195	0.997879	1	7	ko04024	ncbi_100141417(GABBR1);ncbi_100519446(PLD1);ncbi_397378(PPP1CB);ncbi_100519996(GRIA3);ncbi_396609(MAPK9);ncbi_100514612(BRAF);ncbi_100623707(PIK3R1);ncbi_100515635(CREB5);ncbi_100622149(CACNA1S);ncbi_100622559(PIK3CB);ncbi_396856(RYR2);ncbi_100157745(PLCE1);ncbi_100620989(RAPGEF3)	K04615+K01115+K06269+K05199+K04440+K04365+K02649+K09047+K04857+K00922+K04962+K05860+K08014	Com_6717_pos;Com_27274_pos;Com_190_pos;Com_22_pos;Com_10082_pos;Com_13965_pos;Com_18786_neg	C01996+C00020+C00212+C03758+C00788+C01312+C00575
Organismal Systems	Circulatory system	Vascular smooth muscle contraction	6	116	0.997908	1	4	ko04270	ncbi_397155(RAMP2);ncbi_397378(PPP1CB);ncbi_100519976(AGTR1);ncbi_100522824(GNA13);ncbi_100514612(BRAF);ncbi_100622149(CACNA1S)	K08448+K06269+K04166+K04639+K04365+K04857	Com_190_pos;Com_13965_pos;Com_18786_neg;Com_5_neg	C00212+C01312+C00575+C00219
Organismal Systems	Endocrine system	Insulin secretion	3	83	0.998914	1	2	ko04911	ncbi_100515635(CREB5);ncbi_100622149(CACNA1S);ncbi_396856(RYR2)	K09047+K04857+K04962	Com_6717_pos;Com_18786_neg	C01996+C00575
Organismal Systems	Digestive system	Bile secretion	2	68	0.99893	1	31	ko04976	ncbi_503546(SLC4A4);ncbi_396910(ABCB1)	K13575+K05658	Com_233_pos;Com_6717_pos;Com_1160_pos;Com_136_pos;Com_16856_pos;Com_22_pos;Com_2773_pos;Com_40620_pos;Com_8965_pos;Com_9777_pos;Com_92_pos;Com_5_pos;Com_28093_pos;Com_8549_pos;Com_20746_pos;Com_18580_pos;Com_31514_pos;Com_7196_pos;Com_1406_pos;Com_657_neg;Com_3197_neg;Com_734_neg;Com_14443_neg;Com_18786_neg;Com_2700_neg;Com_2258_neg;Com_20674_neg;Com_4463_neg;Com_18982_neg;Com_3874_neg;Com_7427_n…	C00114+C01996+C00318+C00750+C05122+C03758+C06999+C00187+C07184+C09955+C00315+C05551+C00051+C00735+C00735+C07966+C06526+C02166+C03990+C06804+C00366+C00805+C00486+C00575+C03642+C02165+C05466+C01921+C04483+C05465+C00504
Organismal Systems	Digestive system	Salivary secretion	2	75	0.999549	1	3	ko04970	ncbi_100157211(LYZ);ncbi_100516960(SLC12A2)	K13915+K10951	Com_6717_pos;Com_5511_neg;Com_18786_neg	C01996+C13050+C00575
Organismal Systems	Sensory system	Taste transduction	1	67	0.999888	1	11	ko04742	ncbi_100141417(GABBR1)	K04615	Com_6717_pos;Com_27274_pos;Com_1543_pos;Com_140_pos;Com_31514_pos;Com_6944_pos;Com_489_neg;Com_308_neg;Com_28_neg;Com_18786_neg;Com_1305_neg	C01996+C00020+C00208+C00208+C06526+C00144+C00158+C00025+C02265+C00575+C00149
Organismal Systems	Digestive system	Gastric acid secretion	1	72	0.999943	1	2	ko04971	ncbi_100625720(HRH2)	K04150	Com_6717_pos;Com_18786_neg	C01996+C00575
Environmental Information Processing	Signaling molecules and interaction	Neuroactive ligand-receptor interaction	10	273	1	1	15	ko04080	ncbi_396740(NR3C1);ncbi_100141417(GABBR1);ncbi_100048955(C5AR1);ncbi_397488(GHR);ncbi_100519976(AGTR1);ncbi_100519996(GRIA3);ncbi_100625720(HRH2);ncbi_100739757(CHRNB1);ncbi_100520271(GRM2);ncbi_100625298(GABRG3)	K05771+K04615+K04010+K05080+K04166+K05199+K04150+K04812+K04605+K05186	Com_6717_pos;Com_190_pos;Com_22_pos;Com_12527_pos;Com_10082_pos;Com_8549_pos;Com_20746_pos;Com_13965_pos;Com_7312_pos;Com_7196_pos;Com_13476_pos;Com_308_neg;Com_2837_neg;Com_2258_neg;Com_4508_neg	C01996+C00212+C03758+C01598+C00788+C00735+C00735+C01312+C05951+C02166+C05952+C00025+C00049+C02165+C00696
Organismal Systems	Sensory system	Olfactory transduction	3	888	1	1	3	ko04740	ncbi_100152101(SLC8A3);ncbi_100738864(LOC100738864);ncbi_100170767(ARRB2)	K05849+K04257+K04439	Com_27274_pos;Com_6944_pos;Com_18786_neg	C00020+C00144+C00575
